# Supplementary material for: Role of ammonia on fine-particle pH in agricultural regions of China: Comparison between urban and rural sites
Source: Copernicus journal article supplement (doi:10.5194/acp-2019-945), 2019-10-23
Supplement: Supplementary file 1 [file acp-2019-945-supplement.pdf]

1 **Role of ammonia on fine-particle pH in agricultural regions of China:**  
2 **Comparison between urban and rural sites**

3 Shenbo Wang <sup>a</sup>, Lingling Wang <sup>b</sup>, Yuqing Li <sup>c</sup>, Chen Wang <sup>a</sup>, Weisi Wang <sup>b</sup>, Shasha Yin <sup>a</sup>,  
4 \*, Ruiqin Zhang <sup>a, \*</sup>

5 *<sup>a</sup> Research Institute of Environmental Science, College of Chemistry, Zhengzhou*  
6 *University, Zhengzhou, 450001, China*

7 *<sup>b</sup> Department of Environmental Protection of Henan Province, Zhengzhou, 450001,*  
8 *China*

9 *<sup>c</sup> Department of Environment Science and Engineering, Tsinghua University, Beijing*  
10 *100084, China*

11

12

13

14

15

16

17

18

19

20

21

22 Text S1 Calculation of ions balance and equivalent ratio.

23 Fig. S1 Ion balance of water-soluble inorganic ions at five sites (i.e., urban sites at Zhengzhou (U-ZZ)

24 and Anyang (U-AY), rural sites at Anyang (R-AY), Xinxiang (R-XX), and Puyang (R-PY)).

25 Fig. S2 Comparisons of predicted and measured  $\text{NH}_4^+$ ,  $\text{SO}_4^{2-}$ ,  $\text{NO}_3^-$ ,  $\text{NH}_3$ ,  $\text{HNO}_3$  and  $\text{HCl}$  at the five

26 sites.

27 Fig. S3 Comparison of predicted pH by ISORROPIA-II with E-AIM IV at U-ZZ site.

28 Fig. S4 Fig. 2 Temporal variations of temperature (T), relative humidity (RH), wind speed (WS), wind

29 direction (WD), and concentrations of  $\text{NH}_3$  and water-soluble inorganic ions (WSIIs) in three cases at

30 U-AY (a), R-AY (b), R-XX (c), and R-PY (d) sites.

31 Fig. S5 Trajectory frequencies of typical periods during Cases 1 (a), 2(b), and 3 (c).

32 Fig. S6 Sensitivity tests of  $\text{PM}_{2.5}$  pH to  $\text{Na}^+$ ,  $\text{K}^+$ ,  $\text{Ca}^{2+}$  and  $\text{Mg}^{2+}$  in Case 2. The color scale bar represents

33 the pH values. The relative standard deviation (RSD) and range (Range) represent the variation degree

34 and range of pH values in the test.

35 Table S1 Summarized of  $\text{NH}_3$  concentrations in this study and other sites.

36 Table S2 Pearson's correlation coefficients ( $r$ ) between  $\text{H}^+_{\text{air}}$  and input data at the five sites.

37

38

39

40

41

42

43

44 Text S1 Calculation of ions balance and equivalent ratio.

45 The ions balance and equivalent ratio are calculated using following formulas:

46 
$$[\text{cations}] = \frac{[\text{NH}_4^+]}{18} + \frac{[\text{Na}^+]}{23} + \frac{[\text{K}^+]}{39} + \frac{[\text{Ca}^{2+}]}{20} + \frac{[\text{Mg}^{2+}]}{12} \quad (1)$$

47 
$$[\text{anions}] = \frac{[\text{SO}_4^{2-}]}{48} + \frac{[\text{NO}_3^-]}{62} + \frac{[\text{Cl}^-]}{35.5} \quad (2)$$

48 
$$\text{ion balance} = [\text{cations}] - [\text{anions}] \quad (3)$$

49 
$$\text{equivalent ratio} = [\text{cations}]/[\text{anions}] \quad (4)$$

50 where  $[\text{Na}^+]$ ,  $[\text{K}^+]$ ,  $[\text{Ca}^{2+}]$ ,  $[\text{Mg}^{2+}]$ ,  $[\text{NH}_4^+]$ ,  $[\text{SO}_4^{2-}]$ ,  $[\text{NO}_3^-]$ , and  $[\text{Cl}^-]$  are the measured concentrations

51 ( $\mu\text{g}/\text{m}^3$ ) in the atmosphere. The results presented in Fig. S1 show that the observed water-soluble

52 inorganic ions have good balance and are effective as input data for ISORROPIA-II model. In addition,

53 the equivalent ratio suggest that particle was acidic at U-ZZ site and alkaline at other four sites.

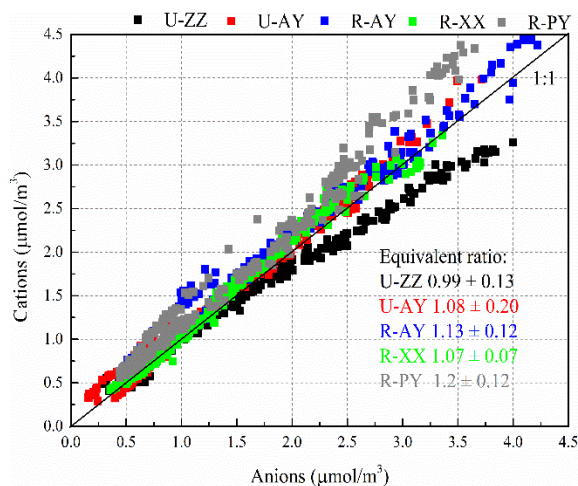

54

55 Fig. S1 Ion balance of water-soluble inorganic ions at five sites (i.e., urban sites at Zhengzhou (U-ZZ)

56 and Anyang (U-AY), rural sites at Anyang (R-AY), Xinxiang (R-XX), and Puyang (R-PY)).

57 .

58

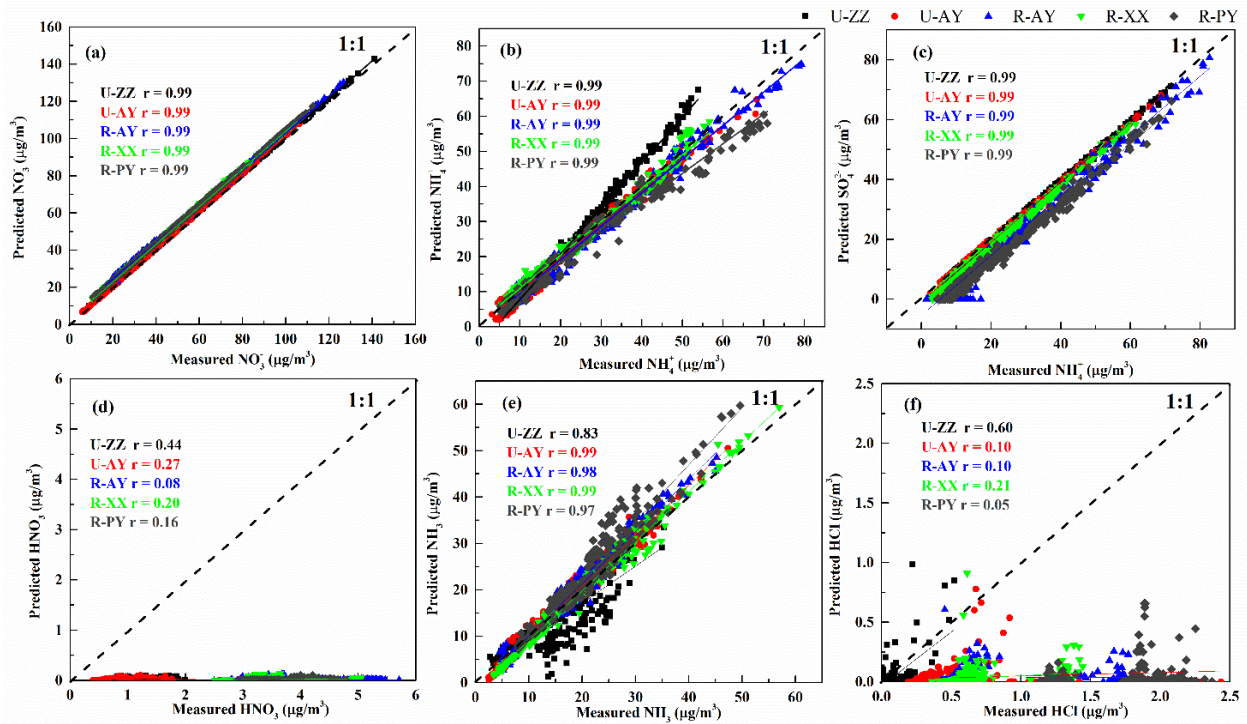

60

61 Fig. S2 Comparisons of predicted and measured  $\text{NH}_4^+$ ,  $\text{SO}_4^{2-}$ ,  $\text{NO}_3^-$ ,  $\text{NH}_3$ ,  $\text{HNO}_3$  and  $\text{HCl}$  at the five

62 sites.

63

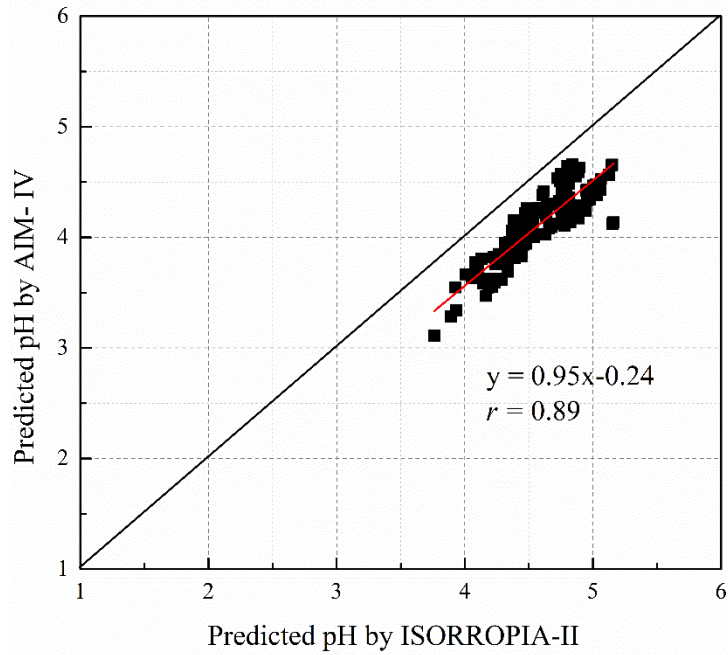

64

65 Fig. S3 Comparison of predicted pH by ISORROPIA-II with E-AIM IV at U-ZZ site.

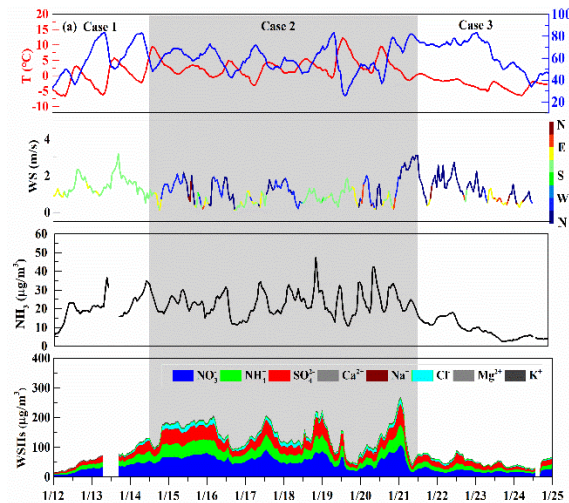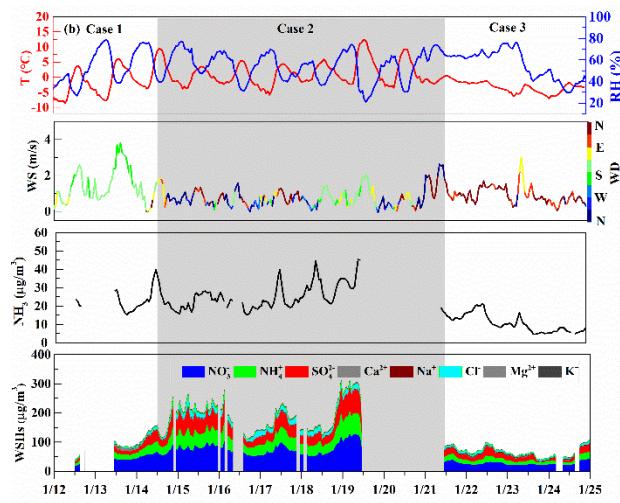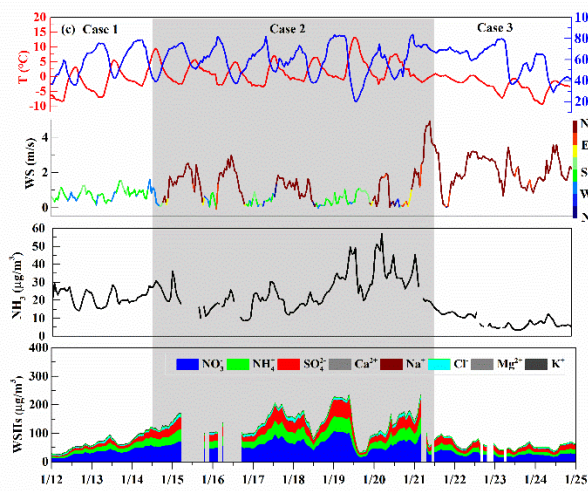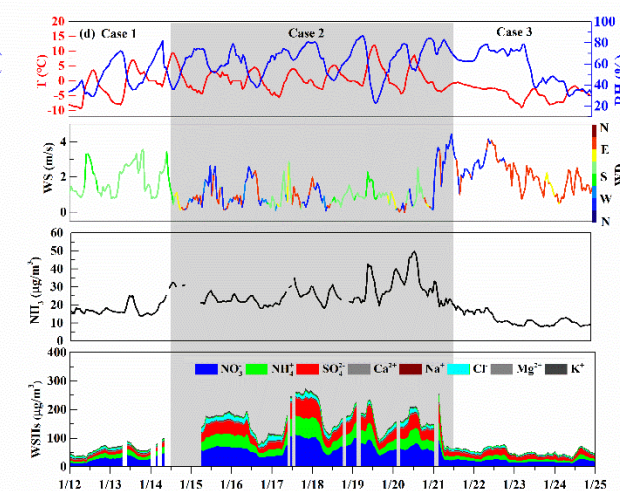

66

67

68 Fig. S4 Fig. 2 Temporal variations of temperature (T), relative humidity (RH), wind speed (WS), wind  
 69 direction (WD), and concentrations of NH<sub>3</sub> and water-soluble inorganic ions (WSIIIs) in three cases at  
 70 U-AY (a), R-AY (b), R-XX (c), and R-PY (d) sites.

71

72

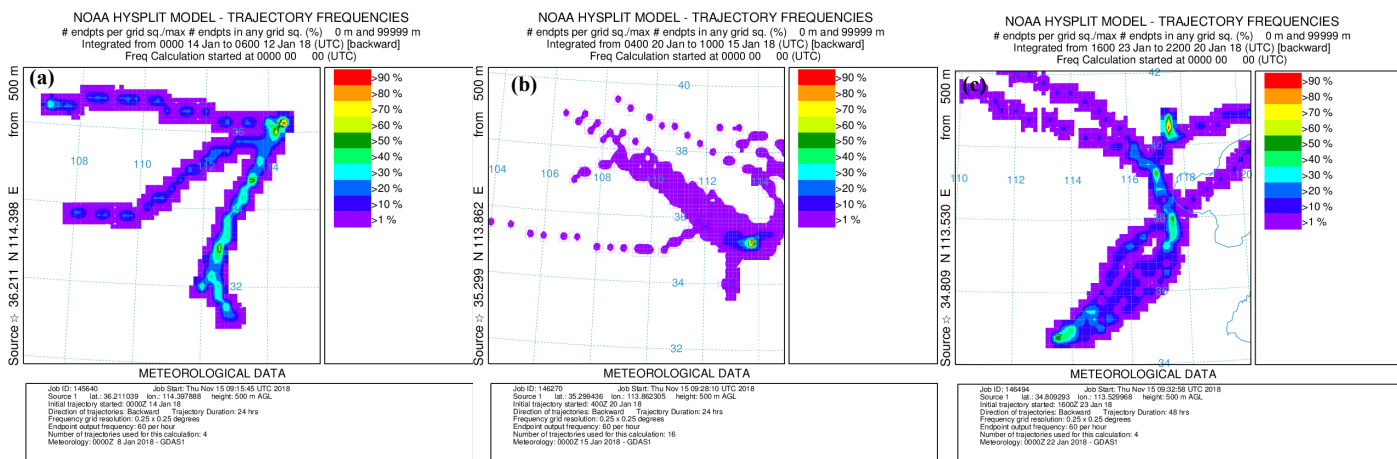

73

74 Fig. S5 Trajectory frequencies of typical periods in Cases 1 (a), 2(b), and 3 (c).

75

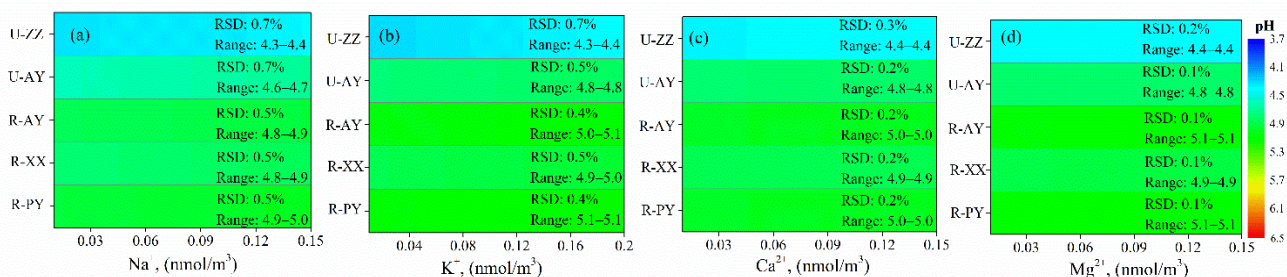

76

77 Fig. S6 Sensitivity tests of PM<sub>2.5</sub> pH to Na<sup>+</sup>, K<sup>+</sup>, Ca<sup>2+</sup> and Mg<sup>2+</sup> in Case 2. The color scale bar represents

78 the pH values. The relative standard deviation (RSD) and range (Range) represent the variation degree

79 and range of pH values in the test.

80

81

82

83

84

85

86

87

88

89 Table S1 Summarized of NH<sub>3</sub> concentrations (μg/m<sup>3</sup>) in this study and other sites.

| Cities                   | Period          | NH <sub>3</sub> | References             |
|--------------------------|-----------------|-----------------|------------------------|
| Zhengzhou, China         | 2018.01         | 22.0 ± 8.9      | This study             |
| Anyang, China            | 2018.01         | 25.3 ± 10.5     | This study             |
| Anyang, China            | 2018.01         | 25.8 ± 12.0     | This study             |
| Xinxiang, China          | 2018.01         | 26.1 ± 14.0     | This study             |
| Puyang, China            | 2018.01         | 27.1 ± 17.3     | This study             |
| Zhengzhou, China         | 2017.03–2018.04 | 11.7            | Wang et al., 2018      |
| Beijing, China           | 2015.01–03      | 7.3             | Zhang et al., 2018     |
| Beijing, China           | 2008.02–2010.07 | 22.8 ± 16.3     | Wang et al., 2018      |
| Beijing, China           | 2007.01–2010.07 | 10.2 ± 10.8     | Wang et al., 2018      |
| Beijing, China           | 2001.07–2001.08 | 16.8–42.2       | Wang et al., 2018      |
| North China Plain, China | 2006.08–2009.09 | 11.7–31.9       | Shen et al., 2011      |
| Xi'an, China             | 2006.04–2007.04 | 18.6            | Wang et al., 2018      |
| Xi'an, China             | 2006.04–2007.04 | 20.3            | Wang et al., 2018      |
| Chengdu, China           | 2014.07–2015.04 | 10.5 ± 4.8      | Wang et al., 2016      |
| Wanzhou, China           | 2014.07–2015.04 | 8.3 ± 4.7       | Wang et al., 2016      |
| shanghai, China          | 2014.05–2015.06 | 7.8             | Chang et al., 2019     |
| Hangzhou, China          | 2012.04–05      | 12.8            | Jansen et al., 2014    |
| Dalian, China            | 2010.09–2012.04 | 1.5             | Luo et al., 2014       |
| Fenghua, China           | 2010.08–2012.05 | 3.7             | Luo et al., 2014       |
| Fujian, China            | 2015.06–2016.05 | 21.0 ± 7.9      | Wang et al., 2018      |
| Fujian, China            | 2015.06–2017.03 | 10.5–13.5       | Wu et al., 2018        |
| Hong Kong, China         | 2003.10–2006.05 | 10.2            | Tanner, 2009           |
| Carolina, USA            | 2000.01–12      | 0.4–3.4         | Walker et al., 2004    |
| Delhi, India             | 2013.01–2015.12 | 25.3 ± 4.6      | Saraswati et al., 2019 |

91 Table S2 Pearson's correlation coefficients ( $r$ ) between  $H^+_{air}$  and input data at the five sites.

|      | TNH <sub>x</sub> | SO <sub>4</sub> <sup>2-</sup> | TNO <sub>3</sub> | TCl     | K <sup>+</sup> | Ca <sup>2+</sup> | Na <sup>+</sup> | Mg <sup>2+</sup> | T       | RH      |
|------|------------------|-------------------------------|------------------|---------|----------------|------------------|-----------------|------------------|---------|---------|
| U-ZZ | 0.650**          | 0.867**                       | 0.828**          | 0.430** | 0.757**        | -0.161*          | 0.306**         | -0.009           | 0.000   | 0.337** |
| U-AY | 0.368**          | 0.625**                       | 0.458**          | 0.406** | 0.388**        | -0.234**         | -0.095          | -0.027           | 0.045   | 0.610** |
| R-AY | 0.544**          | 0.765**                       | 0.607**          | 0.602** | 0.551**        | -0.137*          | 0.098           | -0.018           | -0.138* | 0.631** |
| R-XX | 0.301**          | 0.638**                       | 0.502**          | 0.223** | 0.138*         | -0.248**         | 0.103           | -0.050           | -0.023  | 0.637** |
| R-PY | 0.703**          | 0.811**                       | 0.767**          | 0.419** | 0.485**        | 0.060            | -0.138*         | 0.026            | 0.146*  | 0.658** |

92 \* Correlation is significant at the 0.05 level (two-tailed).

93 \*\* Correlation is significant at the 0.01 level (two-tailed).

94

95

96

97 **References:**

98 Chang, Y., Zou, Z., Zhang, Y., Deng, C., Hu, J., Shi, Z., Dore, A. J., Collett, J. L.: Assessing  
 99 contributions of agricultural and nonagricultural emissions to atmospheric ammonia in a Chinese  
 100 megacity. *Environ. Sci. Technol.*, 53, 1822–1833, 2019.

101 Jansen, R. C., Shi, Y., Chen, J., Hu, Y., Xu, C., Hong, S., Li, J., Zhang, M.: Using hourly measurements  
 102 to explore the role of secondary inorganic aerosol in PM<sub>2.5</sub> during haze and fog in Hangzhou,  
 103 China. *Adv. Atmos. Sci.*, 31, 1427–1434, 2014.

104 Luo, X. S., Tang, A. H., Shi, K., Wu, L. H., Li, W. Q., Shi, W. Q., Shi, X. K., Erisman, J. W., Zhang,  
 105 F., Liu, X. J.: Chinese coastal seas are facing heavy atmospheric nitrogen deposition. *Environ.*  
 106 *Res. Lett.*, 9, 095007, 2014.

107 Saraswati, Sharma, S. K., Saxena, M., Mandal, T. K.: Characteristics of gaseous and particulate  
 108 ammonia and their role in the formation of secondary inorganic particulate matter at Delhi, India.



109 Atmos. Res., 218, 34–49, 2019.

110 Shen, J., Liu, X., Ying, Z., Fangmeier, A., Goulding, K., Zhang, F.: Atmospheric ammonia and  
111 particulate ammonium from agricultural sources in the North China Plain. *Atmos. Environ.*, 45,  
112 5033–5041, 2011.

113 Tanner, P.A.: Vehicle-related ammonia emissions in Hong Kong. *Environ. Chem. Lett.*, 7, 37–40, 2009.

114 Walker, J. T., Whitall, D. R., Robarge, W. P., Paerl, H. W.: Ambient ammonia and ammonium aerosol  
115 across a region of variable ammonia emission density. *Atmos. Environ.*, 38, 1235–1246, 2004.

116 Wang, C., Yin, S., Bai, L., Zhang, X., Gu, X., Zhang, H., Lu, Q., Zhang, R.: High-resolution ammonia  
117 emission inventories with comprehensive analysis and evaluation in Henan, China, 2006–2016.  
118 *Atmos. Environ.*, 193, 11–23, 2018.

119 Wang, H., Yang, F., Shi, G., Tian, M., Zhang, L., Zhang, L., Fu, C.: Ambient concentration and dry  
120 deposition of major inorganic nitrogen species at two urban sites in Sichuan Basin, China. *Environ.*  
121 *Pollut.*, 219, 235–244, 2016.

122 Wu, S., Dai, L., Wei, Y., Zhu, H., Zhang, Y., Schwab, J. J., Yuan, C.: Atmospheric ammonia  
123 measurements along the coastal lines of Southeastern China: Implications for inorganic nitrogen  
124 deposition to coastal waters. *Atmos. Environ.*, 177, 1–11, 2018.

125 Zhang, R., Sun, X., Huang, Y., Shi, A., Yan, J., Nie, T., Yan, X., Li, X.: Secondary inorganic aerosols  
126 formation during haze episodes at an urban site in Beijing, China. *Atmos. Environ.*, 177, 275–  
127 282, 2018.

128

129
