# Supplementary material for: Role of ammonia on fine-particle pH in agricultural regions of China: Comparison between urban and rural sites
Source: Copernicus journal article supplement (doi:10.5194/acp-2019-945), 2019-10-23
Supplement: Supplementary file [file acp-2019-945-AC1-supplement.pdf]

## Responses to the reviewers

**Title:** Role of ammonia on fine-particle pH in agricultural regions of China: Comparison between urban and rural sites.

### General Comments:

This manuscript presents simultaneous measurements of inorganic aerosol composition and key gas-phase species (NH<sub>3</sub>, HCl, HNO<sub>3</sub>) at two urban and three rural sites in Henan Province, China. The measurements occurred during the winter and capture one of the well-documented winter haze episodes. The focus of the manuscript is modeling aerosol pH at the urban-rural sites, and performing sensitivity tests to characterize the factors that most control pH during such polluted conditions. This is a novel and valuable data set that can add important insight to our understanding of aerosol pH. The topic is appropriate for ACP and will be of interest to a broad audience. The manuscript organization and figure quality are generally good, however certain elements of the presentation – namely the English usage – require improvements throughout to bring it up to publication quality. Several analyses and/or results require clarification, and a number of key references are missing. These comments are detailed below.

Thank you for your careful reading of our paper and valuable comments and suggestions. We believe that we have adequately addressed your comments. To facilitate your review, we used yellow highlights for your comments, and red color indicating our own corrections in the manuscript.

### Specific Comments:

Missing from the manuscript is a discussion of measurement uncertainty and statistical significance of the various analyses. For example, throughout the manuscript (line 27–78, 194–195, 203–204, 228–229, 250–254, 260–261) concentrations or values at the five sites are compared and ranked. In some cases, the differences appear to be quite small, and are not likely statistically significant if uncertainty and measurement variability are taken into account.

**Response:** Thanks for the comment. We have added the uncertainty of each instrument based on references or instrument manuals (line 128–146), and pH uncertainty was evaluated by

calculating the input data in two extreme scenarios (see Section 2.4). Considering the measurement uncertainty and statistical significance, we have modified the comparison between urban and rural sites instead of the rank of five sites in the revised version (line 248–250, 254–256, 369–371).

Figures 5, 6, and 7 and the associated discussion in Section 3.3 need clarification. It is not clear how the different sensitivity analyses were performed (What was held constant? What was varied? Which conditions were used for the base simulations?). In some cases, the interpretations also require clarification: e.g., the authors use “%RSD” – how is this actually defined? It seems in the text that they interpret %RSD as actual pH values instead of a percentage, but this could just reinforce the point that this discussion needs to be improved. On the point of RSD, the description in the text does not seem consistent with what is plotted in Fig. 5 or Fig. 7.

**Response:** Sorry for the misunderstanding. We have added a paragraph to describe the sensitivity tests and explain the use of RSD (line 276–290, 310–315): “To explore the dominant factors that determine the local particle pH level and resulting in the high pH at rural sites, sensitivity tests of pH to chemical species (i.e.,  $\text{TNH}_x$ ,  $\text{TH}_2\text{SO}_4$ ,  $\text{TNO}_3$ ,  $\text{TCl}$ ,  $\text{TNa}$ ,  $\text{K}^+$ ,  $\text{Ca}^{2+}$ , and  $\text{Mg}^{2+}$ ) and meteorological parameters (i.e.,  $T$  and  $\text{RH}$ ) were performed. Firstly, the real-time measured values of a variable (e.g.,  $\text{TNH}_x$ ) and average values of other parameters (i.e.,  $\text{TH}_2\text{SO}_4$ ,  $\text{TNO}_3$ ,  $\text{TCl}$ ,  $\text{TNa}$ ,  $\text{K}^+$ ,  $\text{Ca}^{2+}$ ,  $\text{Mg}^{2+}$ ,  $T$  and  $\text{RH}$ ) during Case 2 were input into ISORROPIA-II to investigate the sensitivity of local pH to this variable (i.e.,  $\text{TNH}_x$ ) (Ding et al., 2019), and results are listed in Table 4 and Fig. S10. In addition, a given range for a variable for all sites with corresponding average values of other parameters was simulated to compare its effects on pH among five sites (Figs. 5 and S11). The chosen variation range for each variable was close to the observed minimum and maximum values (Table S4), which aims to better reflect the actual observation conditions. The degree of sensitivity was represented as the relative standard deviation (%RSD) of the re-calculated pH values. RSD calculates the absolute value of the coefficient of variation, which helps us to determine how small or large is the standard deviation when compared to the mean of the re-calculated pH data set. Therefore, when the re-calculated pH data set has a higher RSD value, this variable can change the pH easier and is more important for local pH.”

As stated above, the manuscript requires editing for grammar, English usage, and punctuation. Since this is an issue throughout the manuscript, specific areas for improvement are not identified in ‘Technical Corrections’.

**Response:** We have sought a professional expert to edit our revised manuscript for better flow and readability as well as for correcting some grammatical and editorial errors. In addition, this paper has been re-checked using a professional language editing service (Essaystar Group), Editing Certificate will be provided upon request. Hope it has been improved by correcting the English usage in the revised version.

A number of key references are missing. These need to be cited and the discussion enhanced to include the context they provide. To Sections 3.3 and 3.4 add discussion of Weber et al. (2016), Vasilakos et al. (2018), and Nenes et al. (2019). On the meteorological effects on pH, add discussion of Battaglia et al. (2017) and Tao and Murphy (2019). For recent discussions of aerosol pH importance, definitions, and reported ambient levels, add discussion of Pye et al. (2019). Line 67 refers to several other studies that have examined aerosol pH in agricultural regions of China – the present results should be contrasted with these prior studies.

**Response:** Thanks. We have cited the above-mentioned papers and enhanced the discussion in Sections 3.3 and 3.4. (Line 57–59, 70–73, 82–83, 292–297, 303–306)

Original line 67 (line 80 in the revised version) refers to nearly none of the studies that have examined aerosol pH in agricultural regions of China. In fact, until now, we do not have found a paper focused on the PM<sub>2.5</sub> acidity in agricultural regions of China. Moreover, we add the discussion about the difference of pH at rural sites between the present results and previous studies in the USA (line 252–253).

The discussion of Fig. 3 (line 208–218) needs revision. For Figures 3d, 3e, and 3f, the authors discuss the strong anti-correlated relationships, but why are these separated by case 1, 2, and 3? This is the same location and the measurements are all within a few week span, so the differences in slope and intercept are curious. Discussion of the physical meaning should be provided (e.g., what explanation is there for the greater sensitivity of H<sup>+</sup> to pH in case 1?). It would probably be more instructive to combine these into one plot. For Figures 3g, 3h, and 3i, what explanation do the authors

have for a linear relationship between  $H^+$  and TWSII on a semi-log plot? For a given TWSII concentration, the  $H^+$  level appears to vary by several orders of magnitude, which seems to agree with Guo et al. (2015), Hennigan et al. (2015) and Murphy et al. (2017).

**Response:** Thanks for the suggestion. We have combined the figures 3d, 3e, and 3f into one plot (Fig. S4) and the figures 3g, 3h, and 3i were replaced by Table S2. In addition, we added the underlying reasons for the variations of  $H^+$  for a given TWSII concentration (line 259–262): “Particle hydronium ion aqueous concentration depends on both the presence of ions and the amount of particle AWC (Guo et al., 2015). Moreover,  $H^+$ <sub>air</sub> was closely associated with the  $NH_3$  mixing ratios, and higher  $NH_3$  always corresponded to lower  $H^+$ <sub>air</sub> (Liu et al., 2017)”.

The results in Figure S2 need much more discussion. This is not just limited to the HCl and HNO<sub>3</sub> results, though more explanation should be provided. Typically, the model predictions of pH are validated by the predictions of  $NH_3/NH_4^+$ , HCl/Cl<sup>-</sup>, and HNO<sub>3</sub>/NO<sub>3</sub><sup>-</sup> partitioning in lieu of direct pH measurements. In addition to the problems with HCl and HNO<sub>3</sub> at all sites, it looks like there are systematic differences in  $NH_x$  partitioning between the model and measurements at the U-ZZ and R-PY sites. Why is that and what does this mean for the associated pH predictions at these sites?

**Response:** Thanks for the comments. We have enhanced this discussion (line 199–209): “Correlations between the predicted and measured HNO<sub>3</sub> and HCl are weak. Similar problems were found in the northeast U.S. and Beijing. These discrepancies were potentially due to measurement uncertainties brought about by low gas concentrations, the interference of coarse-mode particles, non-volatile cation measurement artifacts, uncertainties in the thermodynamic constants, and kinetic limitations to mass transfer (Ding et al., 2019, Haskins et al., 2018; Pye et al., 2019; Liu et al., 2017). Pye et al. (2019) suggested that ISORROPIA-II yields a mean activity coefficient of ( $H^+$ , Cl<sup>-</sup>) that may result in the higher predicted HCl concentration. HNO<sub>3</sub> can be partitioned to both fine and coarse modes, thereby affecting predicted fine-mode nitrate concentrations (Nah et al., 2018). The best semi-volatile species for evaluation of pH modeling depend on the fraction of the gas phase. In this work, most of HNO<sub>3</sub> and HCl concentrated in the particle phase, and thus they are not suited to test the model (Guo et al., 2016)”.

In addition, we have added the discussion about the differences in  $NH_x$  partitioning between

the model and measurements at the U-ZZ and R-PY sites (line 185–197): “The differences in the slopes of  $\text{NH}_4^+$  (Fig. S2b) and  $\text{NH}_3$  (Fig. S2e) between U-ZZ and R-PY sites were probably attributed to the unbalanced charge of input WSIs (see Text S1 for more details of calculation) with average equivalent ratios (Fig. S3) of  $0.99 \pm 0.13$  (U-ZZ) and  $1.20 \pm 0.12$  (R-PY). However, Song et al. (2018) argued that ion balance was not a key factor for pH calculation in the forward mode, because the forward mode calculations account for additional constraints imposed by the partitioning of semi-volatile species. To verify this, we adjusted the measured  $\text{NH}_4^+$  concentration, which was most sensitive to pH modeling (see Section 3.3), to fit the ion balance, and reran the pH calculation. As shown in Fig. S4, re-predicted  $\text{NH}_4^+$  and  $\text{NH}_3$  concentrations have better performance ( $r = 0.99$ ,  $0.94 < \text{slopes} < 1.06$ ) with input concentrations at two sites than before. However, re-calculated pH values change slightly, and these deviations are included in the range of pH uncertainty discussed in Section 2.4. Therefore, the little differences in  $\text{NH}_x$  partitioning between the model and measurement among the five sites were acceptable for pH calculation.” Moreover, the reason why the charge of ion was unbalance has been discussed in Text S1: “In addition to the measurement uncertainties, equivalent ratios lower than 1 might be attributed to the loss of cations from the volatilization of ammonium and unmeasured hydrogen ions (Meng et al., 2016). Equivalent ratios higher than 1 were most likely caused by water-soluble organic anions,  $\text{CO}_3^{2-}$  and  $\text{HCO}_3^-$  contents that were not detected in chemical analysis (Tian et al., 2018)”.

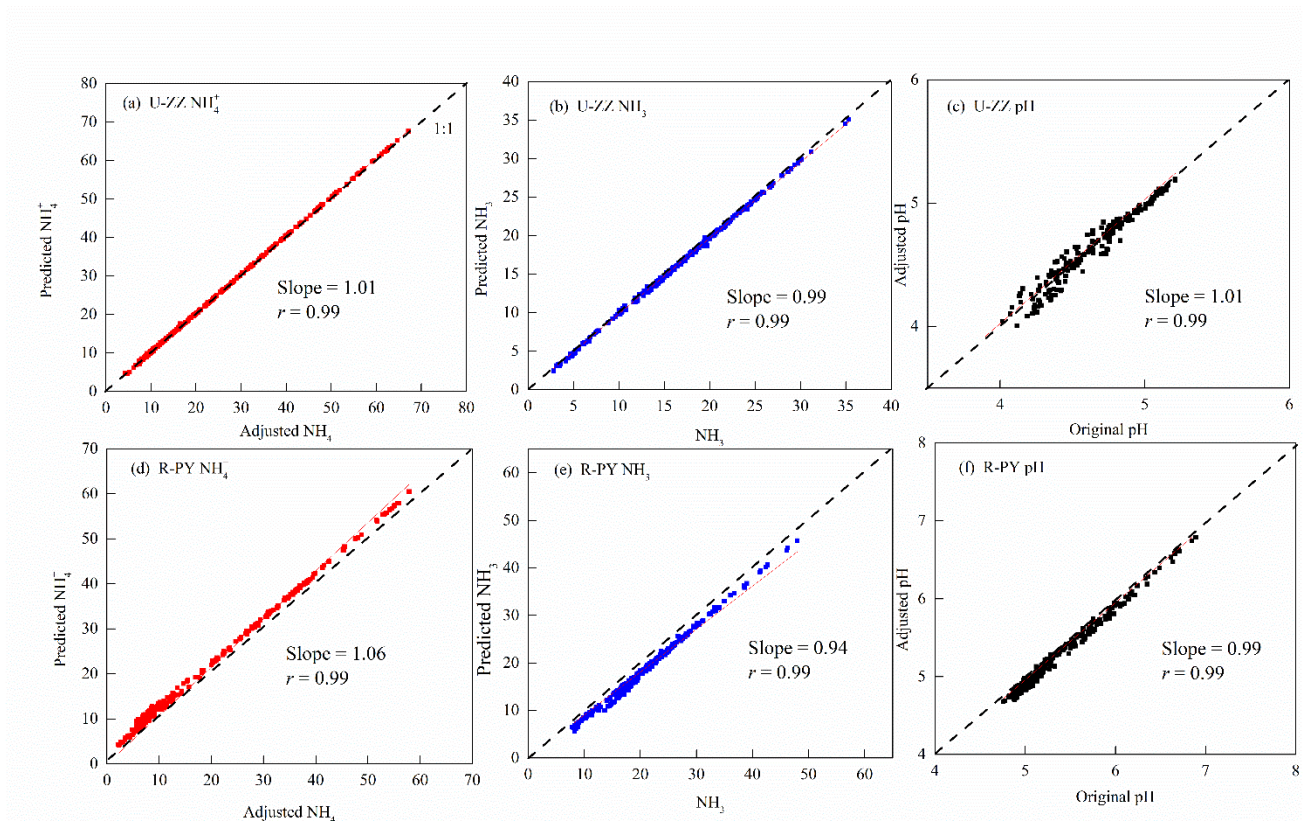

Fig. S4 Comparison between the predicted and input  $\text{NH}_4^+$  (a, d) and  $\text{NH}_3$  (b, c) concentrations, the original and adjusted pH (c, f) of U-ZZ and R-PY sites after adjusting the measured  $\text{NH}_4^+$  concentrations to fit the ion balance.

### Technical Corrections:

A map of the five sites should definitely be included – either in the main manuscript or supplemental.

**Response:** A map has been supplied in the supplemental materials (Fig. S1).

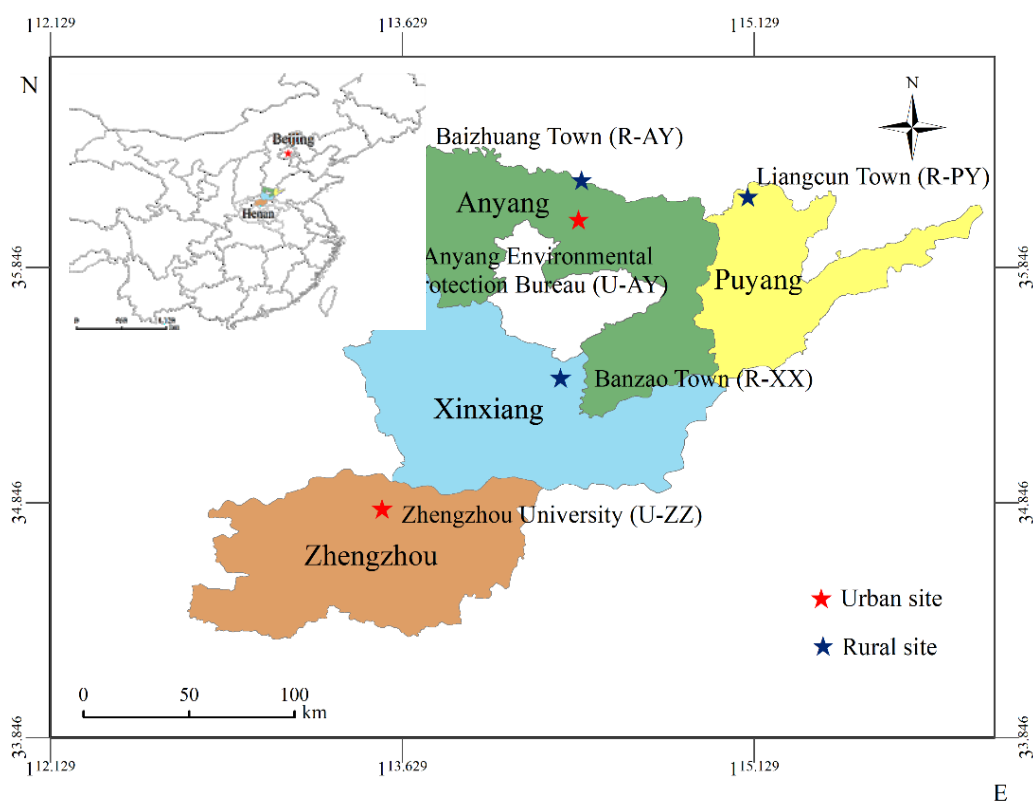

Fig. S1 Locations of the five monitoring stations in Henan Province, China (i.e., urban sites at Zhengzhou (U-ZZ) and Anyang (U-AY), rural sites at Anyang (R-AY), Xinxiang (R-XX), and Puyang (R-PY)). © 2019 National Geomatics Center of China. All rights reserved.

Line 152: ‘distraction’ is not the right term here.

**Response:** The “distraction” has been modified to “interference”. (L 201)

Fig. S5 needs improvement: the scale is not evident from the figures, nor is the relative locations and proximity of the five different sites.

**Response:** A new figure has been supplied to present the trajectory frequencies for each site during three cases with detail discussions in Text S2.



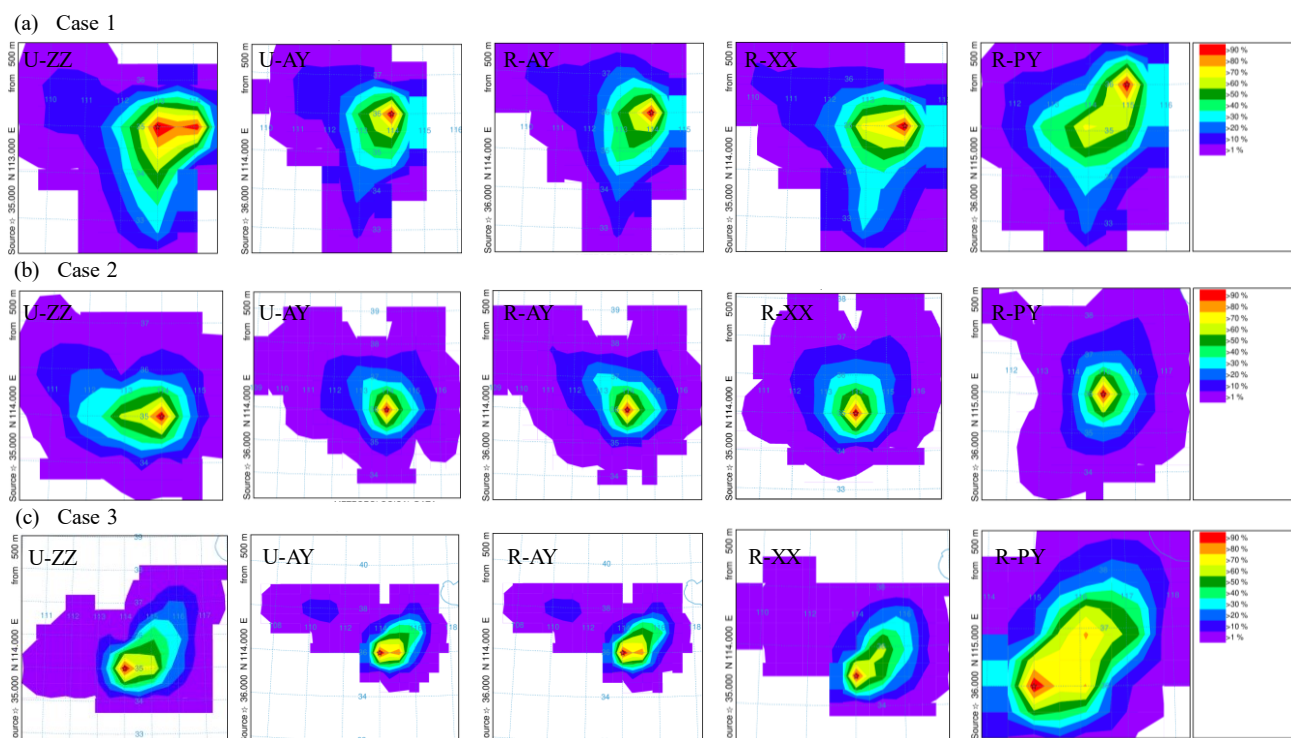

Fig. S5 Trajectory frequencies of typical periods at the five sites during Cases 1(a), 2(b), and 3(c). The color scale bar represents the percentage of trajectories passing through each grid to total trajectories.

Line 238–239: I don’t see where sensitivity of pH to crustal species was analyzed?

**Response:** We have added the discussions on crustal species (line 297–303, 323–325): “TNa, TCl, and crustal ions (i.e.,  $K^+$ ,  $Ca^{2+}$ , and  $Mg^{2+}$ ) have less influence on the predicted pH values, because these species were at low concentrations, together accounting for lower than 10 % of TWSIs. However, since the low volatility of these cations allows them to preferentially neutralize sulfates over  $NH_3$ , the role of crustal dust and sea spray in particle pH cannot be ignored when the mass fraction of these ions are high in typical pollution events (e.g., sandstorm) or areas (e.g., coastland) (Allen et al., 2015; Guo et al., 2018; Vasilakos et al., 2018)”, and “The crustal cations and sea spray have limited effects on pH, but a 10-fold increase in these species still can increase predicted pH values by about 0.1 units”.

Line 262–263: yes, but these are presumably correlated?

**Response:** This sentence has been modified to “Excess- $NH_x$  concentrations may drive the pH values of rural sites higher than those of urban sites”. (Line 371–372)



Line 270–271: this comment is misguided - see Weber et al (2016) for more context and explanation.

**Response:** This comment has been removed.

Line 286: suggest removing ‘obviously’.

**Response:** Done.

Lines 291-292: what is the physical meaning of these equations?

**Response:** These equations have been deleted and discussions on these equations have been cut down.

Line 298-299: this sentence is confusing – I suggest re-writing.

**Response:** This sentence has been removed.

Line 306: I’m not sure the evidence supports this statement. What about meteorology? Also, differences in local vs. regional emissions would need to be accounted for.

**Response:** This sentence has been modified to (line 374–378): “From the above discussion, the differences of pH among three cases indicate that the underlying influence of regional transport on local particle pH cannot be neglected by differing the chemical components of PM<sub>2.5</sub> and meteorological conditions. In particular, the median pH values (Table S2) of Case 1, during when the air masses transported from the south of sampling regions, increased by 0.2–0.9 units than those during Cases 2 and 3”.

Line 333: consider changing ‘promote’ to ‘perturb’?

**Response:** Done.

1 **Role of ammonia on fine-particle pH in agricultural regions of China:**  
2 **Comparison between urban and rural sites**

3 Shenbo Wang <sup>a</sup>, Lingling Wang <sup>b</sup>, Yuqing Li <sup>c</sup>, Chen Wang <sup>a</sup>, Weisi Wang <sup>b</sup>, Shasha Yin <sup>a</sup>,  
4 \*, Ruiqin Zhang <sup>a, \*</sup>

5 *<sup>a</sup> Research Institute of Environmental Science, College of Chemistry, Zhengzhou*  
6 *University, Zhengzhou, 450001, China*

7 *<sup>b</sup> Department of Environmental Protection of Henan Province, Zhengzhou, 450001,*  
8 *China*

9 *<sup>c</sup> Department of Environment Science and Engineering, Tsinghua University, Beijing*  
10 *100084, China*

11

12 \* Corresponding authors: Shasha Yin and Ruiqin Zhang

13 E-mail addresses: shashayin@zzu.edu.cn; rqzhang@zzu.edu.cn

14

15

16

17

18

19

20

21

22 **Abstract:** Particle acidity is a fundamental property that affects atmospheric particulate chemistry.  
23 Synchronous online monitoring was performed in two urban sites (e.g., Zhengzhou (U-ZZ) and  
24 Anyang (U-AY)) and three rural sites (e.g., Anyang (R-AY), Xinxiang (R-XX), and Puyang (R-PY))  
25 in Henan Province during a haze episode to investigate the pH value and its driving factors in the  
26 agricultural regions of China. The pH values of particles calculated by ISORROPIA-II model at rural  
27 sites were slightly higher than those at urban sites, with the median (min–max) values of 5.2 (4.8–6.9,  
28 R-PY), 5.1 (4.7–6.5, R-AY), 4.9 (4.1–6.8, R-XX), 4.8 (3.9–5.9, U-AY), and 4.5 (3.8–5.2, U-ZZ).  
29 Sensitivity tests show that  $\text{TNH}_x$  (total ammonium (gas + aerosol)), followed by total sulfate, were the  
30 important factors that influenced the predicted pH. Generally, particle pH increased with the cation  
31 increasing and the decrease in the anion, temperature, and relative humidity. Similar pH values (~3.0)  
32 at the required  $\text{NH}_x$  concentrations for the five sites indicated that the presence of excess  $\text{NH}_x$  was  
33 likely important for the less acidic of  $\text{PM}_{2.5}$  during the severe haze episodes in this region. Moreover,  
34 the concentrations of excess  $\text{NH}_x$  may drive the higher pH values at rural sites, because of the higher  
35 excess  $\text{NH}_x$  concentrations at rural sites than those at urban sites. The underlying influence of regional  
36 transport on local particle pH cannot be neglected by differing the chemical components of  $\text{PM}_{2.5}$  and  
37 meteorological conditions. Air masses transported from rural and agricultural regions may enhance the  
38 particle pH value in urban aerosols given the high pH of particles and high ammonia levels. These  
39 results suggest that ammonia is urgently needed to be involved in the regional strategy for the  
40 improvement of air quality in China.  
41 **Keywords:** ISORROPIA-II model, Particle acidity, Ammonia, Sensitivity test, Regional transport.

## 42 1 Introduction

43 High concentrations of acids and bases contained in the aqueous phase define the acidity of  
44 aerosols (Spurny, 1990). Particle acidity or pH value is an important parameter for atmospheric  
45 particulate chemistry, such as the gas-particle partitioning of semi-volatile and volatile species (e.g.,  
46  $\text{NH}_3(\text{g})/\text{NH}_4(\text{aq})^+$ ,  $\text{HCl}(\text{g})/\text{Cl}(\text{aq})^-$ , and  $\text{HNO}_3(\text{g})/\text{NO}_3(\text{aq})^-$ ), the formation of secondary inorganic and organic  
47 aerosols, and the dissolution of metallic elements (Bougiatioti et al., 2016; Meskhidze et al., 2003;  
48 Seinfeld and Pandis, 2006; Shi et al., 2019; Shi et al., 2010; Surratt et al., 2010; Wang et al., 2018b).  
49 Particle acidity can affect the ecosystem through its influence on wet/dry deposition, atmospheric  
50 visibility, and radiative balance (Boucher and Anderson, 1995; Larssen et al., 2006; Pye et al., 2019;  
51 Watson, 2002). In addition, high particle acidity has an adverse impact on public health, especially for  
52 the cardiopulmonary and respiration system of humans (Dockery et al., 1996; Ostro et al., 1991).

53 Direct measurements on particle pH are challenging because of the small size and nonideality of  
54 chemical species in solvated aerosols. Therefore, thermodynamic models, such as E-AIM  
55 (<http://www.aim.env.uea.ac.uk/aim/aim.php>) and ISORROPIA-II (<http://isorro피아.eas.gatech.edu>)  
56 (Clegg et al., 1998; Nenes et al., 1998), which rely on the measurements of particulate and gaseous  
57 species, are widely used in estimating particle pH. Generally, the global distribution of fine particulate  
58 matter ( $\text{PM}_{2.5}$ , aerodynamic diameter  $\leq 2.5 \mu\text{m}$ ) pH is bimodal with a population of particles having a  
59 mean pH of 1–3 and another population having an average pH closer to 4–5 (Pye et al., 2019). Table  
60 1 shows that  $\text{PM}_{2.5}$  in mainland China were moderately acidic with pH values that ranged from 3.4–  
61 5.7 (Ding et al., 2019; Guo et al., 2017; Liu et al., 2017; Shi et al., 2017, 2019; Song et al., 2018; Wang  
62 et al., 2019a), which were 3–5 units higher than those reported in other regions, such as Hong Kong,

63 Singapore, USA, and Greece (Behera et al., 2013; Bougiatioti et al., 2016; Guo et al., 2016; Guo et al.,  
64 2014; Pathak et al., 2004).

65 High atmospheric ammonia ( $\text{TNH}_x$ , gas  $\text{NH}_3$  plus particle  $\text{NH}_4^+$ ) is a dominant factor that drives  
66 the high  $\text{PM}_{2.5}$  pH in megacities of China because it suppresses the production of particle hydronium  
67 (Cheng et al., 2016; Wang et al., 2016). Liu et al. (2017) argued that excess  $\text{NH}_3$  and elevated aerosol  
68 water content (AWC) were responsible for the high pH in Beijing. Nevertheless, Guo et al. (2017) and  
69 Song et al. (2018) demonstrated that high levels of ammonia did not increase the  $\text{PM}_{2.5}$  pH into a fully  
70 neutralized condition in Beijing and Xi'an, China. Weber et al. (2016) calculated that only large  
71 increases in  $\text{NH}_3$  together with sulfate reductions can lead to an increase in pH. Correspondingly,  
72 higher pH by about 1 unit than urban aerosols was observed in locations of intensive agriculture with  
73 high  $\text{NH}_3$  concentrations in the southeastern US (Nah et al., 2018). The primary sources for ammonia  
74 include agricultural emissions, such as livestock waste, N-fertilizer application, and biomass burning,  
75 as well as traffic and industrial emissions (Huang et al., 2012; Shen et al., 2011; Wang et al., 2018a).  
76 Field studies have reported that elevated  $\text{NH}_3$  and  $\text{NH}_4^+$  concentrations were recorded at rural sites in  
77 the North China Plain (Meng et al., 2011; Meng et al., 2017; Shen et al., 2011; Wen et al., 2015).  
78 Therefore, studying in an agriculturally developed region is needed to obtain insight into the role of  
79 ammonia in particle pH. Unfortunately, previous studies mainly concentrated on calculating the  
80 particle pH in the megacity of China, and few studies focused on the agricultural regions of China. In  
81 addition to ammonia, particle pH can also be influenced by other chemical compositions and  
82 meteorological conditions, such as sulfate, AWC, temperature (T), and relative humidity (RH). Sulfate  
83 is often the main acid component of aerosols, and largely determines the acidity of  $\text{PM}_{2.5}$  (Weber et al.,

84 2016). Sensitivity tests in Beijing suggested that sulfate,  $\text{TNH}_x$ , and T were the common driving factors,  
85 and  $\text{Ca}^{2+}$  and RH were the unique factors in special seasons (Ding et al., 2019). The pH sensitivity  
86 based on the 10-year record in Canada showed that chemical compositions had various effects on  
87 particle pH under different meteorological conditions; moreover, careful examination for any  
88 particular region is needed (Tao and Murphy, 2019).

89 Henan Province is situated in Central China; it has a dense rural population and is a top-ranking  
90 province in China in terms of agricultural production and chemical fertilizer consumption (NBS, 2016).  
91  $\text{NH}_3$  emission inventory for Henan Province reported that approximately 1031.6 Gg  $\text{NH}_3$  was released  
92 in Henan in 2015, thereby contributing to approximately 10 % of China's total emissions  
93 (approximately 10 Tg) (Huang et al., 2012; Wang et al., 2018a). Livestock waste and N-fertilizer  
94 application were major sources for ammonia emissions, which may increase  $\text{TNH}_x$  concentrations at  
95 rural sites than in urban sites. Furthermore, Henan Province is a severely  $\text{PM}_{2.5}$ -polluted region in  
96 China. In January 2018, a large-scale and long-lasting haze episode that caused  $\text{PM}_{2.5}$  concentration to  
97 reach  $400 \mu\text{g}/\text{m}^3$  occurred in this region (Wang et al., 2019c). An experiment was performed in two  
98 urban and three rural sites in Henan Province to investigate the particle acidity and its driving factor.  
99 ISORROPIA-II model was utilized to estimate  $\text{PM}_{2.5}$  pH using a high-time-resolution dataset. The  
100 novelty of the work addressed in the present study is that this study is the first on  $\text{PM}_{2.5}$  acidity by  
101 comparing urban and rural sites in the agricultural regions of China. The specific objectives of the  
102 study were presented as follows: (1) Estimation and comparison of the  $\text{PM}_{2.5}$  pH at the five monitoring  
103 sites, (2) identification of the factors that determine the pH, and (3) discussion of the role of ammonia  
104 on pH. Our results are helpful to understand the factors that determine particle acidity better.

## 105 **2 Experiment and methods**

### 106 **2.1 Site descriptions**

107 Field sampling was synchronously conducted from January 12 to 24, 2018 at five sites (i.e., two  
108 urban sites located in the center of Zhengzhou (U-ZZ) and Anyang (U-AY), and three sites located in  
109 the rural areas of Anyang (R-AY), Xinxiang (R-XX), and Puyang (R-PY)). Locations of the five sites  
110 (Fig. S1) with brief descriptions are listed in Table 2. U-ZZ site is surrounded by busy roads, and two  
111 freeways are located 3 km to the south and 7 km to the east. Moreover, this site is near a coal-fired  
112 power plant; a gas-fired power plant; and several small-scale industries, such as pharmaceutical  
113 companies, **electronic factories**, and equipment manufacturing. U-AY site is surrounded by busy roads,  
114 and Anyang steelwork is located 8 km to the west. R-AY site is surrounded by farmland and is 1 km  
115 west of the Jing-Gang-Ao freeway and 1 km north of a belt freeway. R-XX and R-PY sites are  
116 surrounded by farmland without other prominent anthropogenic emission sources.

### 117 **2.2 Instrumentations**

118 The hourly mass concentrations of water-soluble inorganic ions (WSIIs) in  $PM_{2.5}$ , such as  $NH_4^+$ ,  
119  $SO_4^{2-}$ ,  $NO_3^-$ ,  $Cl^-$ ,  $Na^+$ ,  $Mg^{2+}$ ,  $Ca^{2+}$ , and  $K^+$  and their gaseous precursors (i.e.,  $NH_3$ ,  $HNO_3$ , and  $HCl$ )  
120 were measured using an ambient ion monitor (URG-9000D, Thermal Fisher Scientific, USA) in U-ZZ  
121 site and the monitor for aerosols and gases (MARGA, Metrohm, Switzerland) in other sites. Both  
122 instruments have been successfully deployed in several other field experiments (Li et al., 2017; Shi et  
123 al., 2017; Wang 2019b), and detailed information is available elsewhere (Markovic et al., 2012;  
124 Rumsey et al., 2014). As a brief summary, ambient air is drawn into the systems at a flow rate of 16.7  
125 L/min. Subsequently, particles and gases are collected by two aerosol sample collectors through a wet



126 parallel plate or wet rotating denuder. Aqueous solution samples are quantified by using two ion  
127 chromatography analyzers. Detection limits for all species during the sampling periods were less than  
128  $0.1 \mu\text{g}/\text{m}^3$ . Measurement uncertainties were assumed to 10 % for URG-9000D here by reference to  
129 10 % of Markovic et al. (2012) and 12 % in Hu et al. (2014). For the MARGA instrument, Song et al.  
130 (2018) took 20 % as overall relative uncertainties for major species, and Rumsey et al. (2014) reported  
131 that the analytical biases were lower than 10 % for  $\text{SO}_4^{2-}$ ,  $\text{NO}_3^-$ , and  $\text{HNO}_3$ , but higher than 15 % for  
132  $\text{NH}_3$  and  $\text{NH}_4^+$ . Therefore, overall uncertainties were estimated to be 20 % for  $\text{NH}_3$  and  $\text{NH}_4^+$  and 10 %  
133 for other species. The combined uncertainties for  $\text{TNH}_x$  were calculated to be 14 % and 23 % for U-  
134 ZZ and other sites, respectively, and 14 % uncertainties of  $\text{TNO}_3$  ( $\text{NO}_3(\text{aq})^- + \text{HNO}_3(\text{g})$ ) and  $\text{TCl}$  ( $\text{Cl}(\text{aq})^-$   
135  $+ \text{HCl}(\text{g})$ ) for all sites. Because of the complex interference during sampling periods at the five sites,  
136 such as the slope from the internal calibration, the solution volume, temperature, pressure, and airflow  
137 rate, the actual uncertainties might be different from the estimated value. Hourly elemental carbon (EC)  
138 and organic carbon (OC) concentrations in  $\text{PM}_{2.5}$  were simultaneously obtained by the semi-  
139 continuous carbon analyzers (Model 4, Sunset Laboratory Inc, USA) in the same place, except for the  
140 U-ZZ site, of which data were provided by the Department of Environmental Protection of Henan  
141 Province. Detailed information on this instrument can be found in Panteliadis et al. (2014). Briefly,  
142  $\text{PM}_{2.5}$  collected by the device was oxidized to carbon dioxide and analyzed by a nondispersive infrared  
143 detector. The relative measurement uncertainty for this instrument was estimated to be 20 % (Liu et  
144 al., 2013; Healy et al., 2013). Meteorological parameters, including T, RH, wind direction, and wind  
145 speed, were recorded by smart weather sensor (LUFFT-WS500, Sutron Corporation, Germany), with  
146 the accuracies of  $\pm 0.2 \text{ }^\circ\text{C}$ ,  $\pm 2 \%$ ,  $< 3 \text{ }^\circ$ , and  $0.1 \text{ m/s}$ , respectively.

## 147 2.3 pH prediction

148 Particle pH was estimated using the ISORROPIA-II thermodynamic model. Input data, including  
149 RH, T, concentrations of  $K^+$ ,  $Ca^{2+}$ ,  $Mg^{2+}$ ,  $TNH_x$ , total sulfate ( $TH_2SO_4$ , replaced by observed  $SO_4^{2-}$ ),  
150 total sodium (TNa, replaced by observed  $Na^+$ ), TCl, and  $TNO_3$ , were used to calculate the particle  
151 hydronium ion concentration per volume of air ( $H^+_{air}$ ) and particle water associated with inorganics  
152 ( $AWC_{inorg}$ ) by computing the equilibrium composition for the  $Na^+$ - $K^+$ - $Ca^{2+}$ - $Mg^{2+}$ - $NH_4^+$ - $SO_4^{2-}$ - $NO_3^-$ -  
153  $Cl^-$ - $H_2O$  aerosol system. Considering that forward mode is less sensitive to measurement error than  
154 the reverse mode and high RH levels were recorded in sampling periods, ISORROPIA-II was run in  
155 the forward model for the aerosol system in the metastable condition (Ding et al, 2019; Guo et al.,  
156 2015; Hennigan et al., 2015). Moreover, we excluded data with  $RH < 30\%$ , a condition where  
157 predicted to observed partitioning of nitrate between the gas and particle phase are in weak correlation,  
158 and thus uncertainties in the pH prediction are expected to be high (Ding et al., 2019; Guo et al., 2016).

159 Aerosol pH was calculated according to the formula (Bougiatioti et al., 2016):

$$160 \quad pH = -\log_{10} H^+_{aq} = -\log_{10} \frac{1000H^+_{air}}{AWC_{inorg} + AWC_{org}}, \quad (1)$$

161 where the modeled concentrations for  $AWC_{inorg}$  and  $H^+_{air}$  are  $\mu g/m^3$ , and  $AWC_{org}$  is the particle water  
162 associated with the organics predicted using the method:

$$163 \quad AWC_{org} = \frac{m_s}{\rho_s} \frac{k_{org}}{\left(\frac{1}{RH} - 1\right)}, \quad (2)$$

164 where  $m_s$  is the mass concentrations of organic matter ( $OC \times 1.6$ ),  $\rho_s$  is the organic density ( $1.35 \text{ g/cm}^3$ ),  
165 and  $k_{org}$  is the organic hygroscopicity parameter (0.06) (Liu et al., 2017).

## 166 2.4 pH uncertainty

167 Two extreme scenarios were evaluated to estimate the pH uncertainty based on the measurement

168 uncertainties of input data (Murphy et al., 2017). Sensitivity tests of pH to input data (see Section 3.3)  
169 suggest that simulated pH increase with the cation concentrations (i.e.,  $\text{TNH}_x$ ,  $\text{TNa}$ ,  $\text{K}^+$ ,  $\text{Ca}^{2+}$ , and  $\text{Mg}^{2+}$ )  
170 increasing as well as the anion concentrations (i.e.,  $\text{TH}_2\text{SO}_4$ ,  $\text{TNO}_3$ , and  $\text{TCl}$ ),  $T$  and  $\text{RH}$  decreasing.  
171 Moreover, the pH value has a positive correlation with OC concentrations via Eqs. (1 and 2). Therefore,  
172 cation and OC concentrations were adjusted up to within their maximum positive uncertainties, and  
173 anions,  $\text{RH}$  and  $T$  were adjusted down within their maximum negative uncertainties, which represented  
174 the  $\text{pH}_{\text{max}}$  case; for  $\text{pH}_{\text{min}}$  case, cations and OC concentrations were adjusted down, and anions,  $\text{RH}$   
175 and  $T$  were adjusted up. Figure 1 suggests that  $\text{pH}_{\text{max}}$  cases lead to 6 % (slope = 1) errors for all sites,  
176 and  $\text{pH}_{\text{min}}$  cases can result in approximately 10 % deviations. Thus, pH uncertainties were set to be  
177 -9-6 %, -13-6 %, -12-6 %, -11-6 %, and -10-5 % for U-ZZ, U-AY, R-AY, R-XX, and R-PY sites,  
178 respectively.

## 179 2.5 Model validation

180 The reliability of pH estimation using the ISORROPIA-II thermodynamic model depends on  
181 several assumptions, such as the equilibrated gas and particle phases (Pye et al., 2019). Thus, the  
182 predicted and observed semi-volatile species (e.g.,  $\text{NH}_3(\text{g})/\text{NH}_4(\text{aq})^+$ ,  $\text{HCl}(\text{g})/\text{Cl}(\text{aq})^-$ , and  $\text{HNO}_3(\text{g})/\text{NO}_3(\text{aq})^-$ )  
183 are compared in Fig. S2. Observed and predicted  $\text{NH}_4^+$ ,  $\text{Cl}^-$ , and  $\text{NO}_3^-$  exhibit significant correlations,  
184 have correlation coefficients ( $r$ ) above 0.95 and slopes near 1 at the five sites. In addition,  $\text{NH}_3$   
185 concentrations are in good agreement ( $r > 0.95$ ) with slopes between 0.89 (U-ZZ) and 1.13 (R-PY).  
186 These results suggest the excellent performance of ISORROPIA-II for modeling these species. The  
187 differences in the slopes of  $\text{NH}_4^+$  (Fig. S2b) and  $\text{NH}_3$  (Fig. S2e) between U-ZZ and R-PY sites were  
188 probably attributed to the unbalanced charge of input WSIs (see Text S1 for more details of calculation)

189 with average equivalent ratios (Fig. S3) of  $0.99 \pm 0.13$  (U-ZZ) and  $1.20 \pm 0.12$  (R-PY). However, Song  
190 et al. (2018) argued that ion balance was not a key factor for pH calculation in the forward mode,  
191 because the forward mode calculations account for additional constraints imposed by the partitioning  
192 of semi-volatile species. To verify this, we adjusted the measured  $\text{NH}_4^+$  concentration, which was most  
193 sensitive to pH modeling (see Section 3.3), to fit the ion balance, and reran the pH calculation. As  
194 shown in Fig. S4, re-predicted  $\text{NH}_4^+$  and  $\text{NH}_3$  concentrations have better performance ( $r = 0.99, 0.94$   
195  $< \text{slopes} < 1.06$ ) with input concentrations at two sites than before. However, re-calculated pH values  
196 change slightly, and these deviations are included in the range of pH uncertainty discussed in Section  
197 2.4. Therefore, the little differences in  $\text{NH}_x$  partitioning between the model and measurement among  
198 the five sites were acceptable for pH calculation.

199 Correlations between the predicted and measured  $\text{HNO}_3$  and  $\text{HCl}$  are weak. Similar problems  
200 were found in the northeast U.S. and Beijing. These discrepancies were potentially due to measurement  
201 uncertainties brought about by low gas concentrations, the interference of coarse-mode particles, non-  
202 volatile cation measurement artifacts, uncertainties in the thermodynamic constants, and kinetic  
203 limitations to mass transfer (Ding et al., 2019, Haskins et al., 2018; Pye et al., 2019; Liu et al., 2017).  
204 Pye et al. (2019) suggested that ISORROPIA-II yields a mean activity coefficient of ( $\text{H}^+, \text{Cl}^-$ ) that may  
205 result in the higher predicted  $\text{HCl}$  concentration.  $\text{HNO}_3$  can be partitioned to both fine and coarse modes,  
206 thereby affecting predicted fine-mode nitrate concentrations (Nah et al., 2018). The best semi-volatile  
207 species for evaluation of pH modeling depend on the fraction of the gas phase. In this work, most of  
208  $\text{HNO}_3$  and  $\text{HCl}$  concentrated in the particle phase, and thus they are not suited to test the model (Guo  
209 et al., 2016).

210 The PM<sub>2.5</sub> pH was also calculated by the E-AIM (Version IV) model to evaluate the performance  
211 of ISORROPIA-II using the observed data (RH > 60 %) of the U-ZZ site as an example. Close  
212 correlation ( $r = 0.89$ ) is found between two models with a slope of 0.95 (Fig. S5). The pH values in  
213 ISORROPIA-II are  $0.46 \pm 0.15$  units higher than those in E-AIM. These values are comparable to the  
214 founding by Liu et al. (2017) and Song et al. (2018), **which is possibly due to the differences of activity**  
215 **coefficient values between the ISORROPIA-II and E-AIM models (Pye et al., 2019)**. Overall, the  
216 predicted pH values using ISORROPIA-II are effective in this work.

### 217 **3 Results and discussion**

#### 218 **3.1 Haze episodes**

219 During the sampling periods, five monitoring sites simultaneously experienced a long-lasting and  
220 large-scale haze episode. Time series of the concentrations of major species (i.e., NH<sub>3</sub>, NH<sub>4</sub><sup>+</sup>, SO<sub>4</sub><sup>2-</sup>,  
221 and NO<sub>3</sub><sup>-</sup>) and meteorological parameters at the U-ZZ site as an example are presented in Fig. 2, and  
222 other sites are integrated into Fig S6 with the mean values listed in Table 3. Three study cases were  
223 classified on the basis of similar meteorological conditions and WSIs levels at the five sites. The  
224 WSIs concentration, T, and RH gradually increased in the southern wind during Case 1 (January  
225 12–14). Case 3 (January 21–25) was characterized by decreased WSII concentrations, T, and RH with  
226 the northeastern wind. Even though the total WSIs (TWSIs) concentrations were comparable, the  
227 chemical components of WSIs were various between Cases 1 and 3 (Table 3). In particular, NO<sub>3</sub><sup>-</sup>,  
228 NH<sub>4</sub><sup>+</sup>, and NH<sub>3</sub> concentrations in Case 1 were higher than those in Case 3 at all sites. Conversely,  
229 SO<sub>4</sub><sup>2-</sup> concentrations in Case 1 were lower than those in Case 3. Wang et al. (2018a) reported that the  
230 southern cities of Henan Province (e.g., Nanyang, Shangqiu, Zhoukou, and Zhumadian) had relatively

231 higher ammonia emissions than the cities involved in this study. Moreover, the northeastern air masses  
232 from the Jing–Jin–Ji regions were easily enriched with sulfate (Wang et al., 2019b; Wang et al., 2018c).  
233 Evidently, back trajectory frequency analysis (see Text S2 for more details of the discussion) confirmed  
234 that sampling sites during Cases 1 and 3 (Figs. S7a and c) were predominantly influenced by the  
235 southern and northeastern air masses, respectively.

236 Elevated WSIs concentrations during Case 2 (January 14–21) were under high T and RH  
237 conditions with variable wind directions. In this case, local emissions played a key role in WSIs (Fig.  
238 S7b) with average  $\text{NH}_4^+$ ,  $\text{SO}_4^{2-}$ , and  $\text{NO}_3^-$  concentrations that ranged from  $31.9 \pm 12.5 \mu\text{g}/\text{m}^3$  (U-ZZ)  
239 to  $47.6 \pm 13.1 \mu\text{g}/\text{m}^3$  (R-AY),  $32.9 \pm 12.5 \mu\text{g}/\text{m}^3$  (R-XX) to  $46.8 \pm 16.9 \mu\text{g}/\text{m}^3$  (R-AY), and  $58.0 \pm 18.3$   
240  $\mu\text{g}/\text{m}^3$  (U-AY) to  $76.8 \pm 21.1 \mu\text{g}/\text{m}^3$  (R-AY), respectively. Note that higher concentrations of  $\text{NH}_4^+$ ,  
241  $\text{NH}_3$ , and  $\text{TNH}_x$  during Case 2 were recorded at rural sites than those at urban sites. Moreover,  $\text{NH}_3$   
242 levels in this work were higher than those in other studies summarized in Table S1. Agricultural  
243 emissions, including livestock waste, N-fertilizer application, and humans, were the top three ammonia  
244 contributors in Henan Province (Wang et al., 2018a), which may result in elevated ammonia  
245 concentrations at rural sites.

### 246 3.2 pH of $\text{PM}_{2.5}$ at the urban and rural sites

247 Figure 3 exhibits the predicted  $\text{PM}_{2.5}$  pH values,  $\text{H}^+_{\text{air}}$ , and AWC at the five sites, pH uncertainties  
248 based on the  $\text{pH}_{\text{max}}$  and  $\text{pH}_{\text{min}}$  calculations are presented in Fig. S8.  $\text{PM}_{2.5}$  have consistent moderate  
249 acidity during this haze episode, with median (min–max) pH values of 4.5 (3.8–5.2), 4.8 (3.9–5.8), 4.9  
250 (4.1–6.2), 5.1 (4.7–6.3), and 5.2 (4.8–6.5,) at U-ZZ, U-AY, R-XX, R-AY, and R-PY, respectively. As  
251 summarized in Table 1,  $\text{PM}_{2.5}$  pH values were close to the results of other cities in China (e.g., Beijing,

252 Xi'an, and Tianjin), but higher than other countries (e.g., Singapore, USA, and Greece). Compared to  
253 the rural sites in the USA, pH values were roughly 3 units higher at the R-AY, R-XX, and R-PY sites.  
254 Moreover, statistical values of pH (Table S2) during three cases show higher pH values at rural sites  
255 than those at urban sites, especially for the U-ZZ and R-PY sites during Case 1 despite their pH  
256 uncertainties (Section 2.4).

257 The pH values (Table S2) of the five sites during Cases 2 and 3 were comparable but slightly  
258 lower than those during Case 1. As shown in Fig. S9, predicted pH values present better correlations  
259 with  $H^+_{\text{air}}$  concentrations rather than AWC. Particle hydronium ion aqueous concentration depends on  
260 both the presence of ions and the amount of particle AWC (Guo et al., 2015). Moreover,  $H^+_{\text{air}}$  was  
261 closely associated with the  $\text{NH}_3$  mixing ratios, and higher  $\text{NH}_3$  always corresponded to lower  $H^+_{\text{air}}$  (Liu  
262 et al., 2017). High correlations ( $r > 0.5$ ) between  $H^+_{\text{air}}$  and TWSIIs (Table S3) imply that local pH was  
263 significantly affected by the TWSIIs levels, and probably resulting in the high acidity during Case 2.  
264  $H^+_{\text{air}}$  was also correlated with individual chemical species (e.g.,  $\text{TNH}_x$ ,  $\text{TH}_2\text{SO}_4$ ,  $\text{TNO}_3$ , and  $\text{TCl}$ ).  
265 Therefore, the diversity of pH in Cases 1 and 3 may be partly owing to the different proportions of  
266 particle- and gas-phase constituents that will be discussed in detail below. In addition, high correlations  
267 between RH and  $H^+_{\text{air}}$  (Table S3) suggest the major role of meteorological conditions in particle pH.  
268 Given the Case 2 was less affected by regional transport, the diurnal patterns of median pH values of  
269 the five sites (Fig. 4) indicate that pH values during nighttime were 0.3 (R-PY)–0.5 (U-ZZ) units higher  
270 than those during the daytime. Similar results were also found in other cities (e.g., Beijing, Tianjin,  
271 southern Canada, and the USA) (Battaglia et al., 2017; Ding et al., 2019; Guo et al., 2015; Murphy et  
272 al., 2017; Shi et al., 2019), resulting from the diurnal trends of T and RH (Fig. 4f). After sunrise, high



273 T facilitated the dissociation of particle-phase ammonium (e.g.,  $\text{NH}_4\text{NO}_3$ ) and led to a rapid loss of  
274 AWC (Guo et al., 2015; Saraswati et al., 2019).

### 275 3.3 Sensitivity tests of pH

276 To explore the dominant factors that determine the local particle pH level and resulting in the high  
277 pH at rural sites, sensitivity tests of pH to chemical species (i.e.,  $\text{TNH}_x$ ,  $\text{TH}_2\text{SO}_4$ ,  $\text{TNO}_3$ ,  $\text{TCl}$ ,  $\text{TNa}$ ,  $\text{K}^+$ ,  
278  $\text{Ca}^{2+}$ , and  $\text{Mg}^{2+}$ ) and meteorological parameters (i.e., T and RH) were performed. Firstly, the real-time  
279 measured values of a variable (e.g.,  $\text{TNH}_x$ ) and average values of other parameters (i.e.,  $\text{TH}_2\text{SO}_4$ ,  $\text{TNO}_3$ ,  
280  $\text{TCl}$ ,  $\text{TNa}$ ,  $\text{K}^+$ ,  $\text{Ca}^{2+}$ ,  $\text{Mg}^{2+}$ , T and RH) during Case 2 were input into ISORROPIA-II to investigate the  
281 sensitivity of local pH to this variable (i.e.,  $\text{TNH}_x$ ) (Ding et al., 2019), and results are listed in Table 4  
282 and Fig. S10. In addition, a given range for a variable for all sites with corresponding average values  
283 of other parameters was simulated to compare its effects on pH among five sites (Figs. 5 and S11). The  
284 chosen variation range for each variable was close to the observed minimum and maximum values  
285 (Table S4), which aims to better reflect the actual observation conditions. The degree of sensitivity  
286 was represented as the relative standard deviation (%RSD) of the re-calculated pH values. RSD  
287 calculates the absolute value of the coefficient of variation, which helps us to determine how small or  
288 large is the standard deviation when compared to the mean of the re-calculated pH data set. Therefore,  
289 when the re-calculated pH data set has a higher RSD value, this variable can change the pH easier and  
290 is more important for local pH.

291 As shown in Table 4, the most important factor that influenced particle pH during Case 2 was  
292  $\text{TNH}_x$ , followed by  $\text{TH}_2\text{SO}_4$  at the five sites, and the U-ZZ site was also affected by  $\text{TNO}_3$ . The acidity  
293 of  $\text{PM}_{2.5}$  is governed by the phase partitioning of semi-volatile gases such as  $\text{NH}_3$ ,  $\text{HNO}_3$ , and  $\text{HCl}$

294 (Pye et al., 2019).  $(\text{NH}_4)_2\text{SO}_4$ ,  $\text{NH}_4\text{HSO}_4$ , and  $\text{NH}_4\text{NO}_3$ , which are mainly formed through  
295 neutralization reactions between  $\text{NH}_3$  with  $\text{SO}_4^{2-}$  and  $\text{HNO}_3$  orderly according to the regime of local  
296 ammonia, are the most abundant components of  $\text{PM}_{2.5}$  in winter haze in this region (Wang et al., 2019c;  
297 Pathak et al., 2008). Therefore, particle pH was driven by  $\text{TNH}_x$ ,  $\text{TH}_2\text{SO}_4$ , and  $\text{TNO}_3$ .  $\text{TNa}$ ,  $\text{TCl}$ , and  
298 crustal ions (i.e.,  $\text{K}^+$ ,  $\text{Ca}^{2+}$ , and  $\text{Mg}^{2+}$ ) have less influence on the predicted pH values, because these  
299 species were at low concentrations, together accounting for lower than 10 % of TWSIIs. However,  
300 since the low volatility of these cations allows them to preferentially neutralize sulfates over  $\text{NH}_3$ , the  
301 role of crustal dust and sea spray in particle pH cannot be ignored when the mass fraction of these ions  
302 are high in typical pollution events (e.g., sandstorm) or areas (e.g., coastland) (Allen et al., 2015; Guo  
303 et al., 2018; Vasilakos et al., 2018). In addition to chemical species, T was more sensitive to local pH  
304 than RH at the five sites, which is similar to the finding in Beijing and Canada (Ding et al., 2019; Tao  
305 and Murphy, 2019). This result can be explained by the remarkable influence of T on the solubility and  
306 dissociation constants of the partitioning of  $\text{NH}_{3(\text{g})}/\text{NH}_{4(\text{aq})}^+$  (Hennigan et al., 2015).

307 Figures 5 and S11 compare the sensitive degrees of pH to input data among different sites. Except  
308 for  $\text{TNH}_x$ , the sensitivities of pH to  $\text{TH}_2\text{SO}_4$ ,  $\text{TNO}_3$ , and other ions at urban sites were more significant  
309 than those at rural sites, particularly at U-ZZ sites of 7.2 % and 14.8 % of RSD to  $\text{TH}_2\text{SO}_4$  and  $\text{TNO}_3$ ,  
310 respectively. To gain insight into the differences of pH sensitivity among the five sites, sensitivity tests  
311 of pH to  $\text{TH}_2\text{SO}_4$ ,  $\text{TNO}_3$ , and  $\text{TNH}_x$  were calculated using the fixed  $\text{TNO}_3$  ( $67.5 \mu\text{g}/\text{m}^3$ ) and  $\text{TH}_2\text{SO}_4$   
312 ( $36.5 \mu\text{g}/\text{m}^3$ ) concentrations under the average meteorological conditions of five sites (i.e.,  $T = 2.5 \text{ }^\circ\text{C}$   
313 and  $\text{RH} = 60 \%$ ). These chosen values were close to the average values of the five sites during Case 2  
314 (i.e.,  $36.4 \pm 15.4 \mu\text{g}/\text{m}^3$  for  $\text{SO}_4^{2-}$ ,  $67.5 \pm 23.5 \mu\text{g}/\text{m}^3$  for  $\text{TNO}_3$ ,  $2.5 \pm 1.5 \text{ }^\circ\text{C}$  for T, and  $59.3 \pm 14.0 \%$

315 for RH), and other chemical species were set to be zero. As shown in Fig. 6, sensitivities of pH to  
316 TH<sub>2</sub>SO<sub>4</sub> and TNO<sub>3</sub> increase with the decrease in TNH<sub>x</sub> concentration, particularly when the TNH<sub>x</sub>  
317 concentrations are lower than 60 µg/m<sup>3</sup> and 40 µg/m<sup>3</sup>, respectively. Therefore, the pH changes tended  
318 to become more sensitive to TH<sub>2</sub>SO<sub>4</sub> and TNO<sub>3</sub> at the U-ZZ site (Fig. 5e, f) with the lowest TNH<sub>x</sub>  
319 concentrations (46.8 ± 14.7 µg/m<sup>3</sup>). All these results may be explained by the presence of excess  
320 ammonia that will be discussed below.

321 Sensitivity tests suggest (Fig. 5, S10, and S11) that particle pH gradually grows with increased  
322 cation and decreased anion concentrations. Specifically, the TNH<sub>x</sub> concentration that increased from  
323 25 µg/m<sup>3</sup> to 90 µg/m<sup>3</sup> can promote particle pH by 3.5 (U-ZZ)–4.5 (R-AY) units. The crustal cations  
324 and sea spray have limited effects on pH, but a 10-fold increase in these species still can increase  
325 predicted pH values by about 0.1 units. TH<sub>2</sub>SO<sub>4</sub>, and TNO<sub>3</sub> that increased from 10 µg/m<sup>3</sup> to 80 µg/m<sup>3</sup>,  
326 and 1 µg/m<sup>3</sup> to 125 µg/m<sup>3</sup> can reduce the pH values by 1.5 (R-PY)–4.0 (U-ZZ), and 0.2 (R-AY)–1.4  
327 (U-ZZ) units, respectively. In addition, a 20 °C (–5 °C to 15 °C) and 65 % (30 % to 95 %) increase  
328 drops the pH by approximately 1.3 and 2.7 units at the five sites, respectively. Corresponding to the  
329 observed data during Case 2 (Table 3), lower TNH<sub>x</sub> concentrations and higher T values were probably  
330 responsible for the higher acidity at urban sites than those at rural sites. Moreover, Figure 6 shows that  
331 particle pH increase with decreasing TH<sub>2</sub>SO<sub>4</sub> (Fig. 6a) or increasing TNO<sub>3</sub> (Fig. 6b), particularly when  
332 the TNH<sub>x</sub> is at high concentration. These results indicate that predicted pH will be enhanced by  
333 increasing the TNO<sub>3</sub>/TH<sub>2</sub>SO<sub>4</sub> ratio, which is consistent with the observation in Beijing (Xie et al.,  
334 2019). All these may be due to the elevated ammonia partitioning with nitrate fraction increase, and  
335 nitrate-rich particles would absorb more water compared to the sulfate-rich particles (Xie et al., 2019).

336 Based on the above, higher  $\text{TNH}_x$  (Table 3) and  $\text{TNO}_3/\text{TH}_2\text{SO}_4$  ratios ( $2.9 \pm 0.6$  and  $1.7 \pm 0.6$  for Cases  
337 1 and 3 respectively) during Case 1 may lead to the higher pH values than those during Case 3, even  
338 though the TWSIIs levels were comparable. In the long run, the decreasing sulfate concentration in  
339  $\text{PM}_{2.5}$  accompanied with increasing nitrate concentration has been recorded during haze episodes in  
340 China, because strong actions were taken to reduce the coal consumption in recent years (Tian et al.,  
341 2017; Wang et al., 2017). Considering the ammonia in the atmosphere of North China might still be  
342 increasing (Liu et al., 2018), future acidity of  $\text{PM}_{2.5}$  during winter haze episodes is expected to become  
343 increasingly less acidic in this area. A more careful analysis is needed to test this inference, however,  
344 because fine-mode particle remains a relatively constant pH of 0–2 despite a 70 % reduction in sulfates  
345 in the USA (Vasilakos et al., 2018; Weber et al., 2016).

#### 346 **3.4 Role of ammonia on pH**

347 It has been suggested that unusually high levels of  $\text{NH}_3$  can increase pH, on average, a 5-fold to  
348 10-fold increase in the  $\text{NH}_3$  levels leads to a one-unit change in pH (Nah et al., 2018; Weber et al.,  
349 2016; Guo et al., 2017). To examine the effects of major indicators of ammonia (i.e.,  $\text{TNH}_x$ , Required-  
350  $\text{NH}_x$ , and Excess- $\text{NH}_x$ , see Text S3 for more details of calculation) on aerosol acidity, particle pH was  
351 calculated by using a wide range of  $\text{TNH}_x$  ( $25\text{--}130 \mu\text{g}/\text{m}^3$ ) and average values of other parameters  
352 during Case 2 (Table 3) of each site. Simultaneously, the concentrations of  $\text{TNH}_x$ , Required- $\text{NH}_x$ ,  
353 Excess- $\text{NH}_x$ , and corresponding pH values are illustrated in Fig. 7. An “S-curve” growth trend of pH  
354 to increasing  $\text{TNH}_x$  appears with the inflection point around the Required- $\text{NH}_x$  concentration. In the  
355 case when the input  $\text{TNH}_x$  concentration is lower than the Required- $\text{NH}_x$ , the growth rate of pH  
356 increase with  $\text{TNH}_x$  increasing, otherwise, the pH growth flattens out, which is similar to the findings

357 of Weber et al. (2016) and Bougiatioti et al. (2016). In the process of increasing  $\text{NH}_3$  concentration,  
358  $\text{NH}_3$  reacted with  $\text{SO}_4^{2-}$  and  $\text{HNO}_3$  orderly, during when large amounts of  $\text{H}^+$  were consumed and pH  
359 values rapidly increased. Theoretically, the Required- $\text{NH}_x$  plus nonvolatile cations can neutralize all  
360 anions regardless of the phase partitioning and bisulfate formation, and thus changes in  $\text{TNH}_x$  around  
361 the Required- $\text{NH}_x$  concentrations have a significant impact on particle pH. Subsequently, dissolving  
362 Excess- $\text{NH}_x$  into the particles became difficult, and pH values increased slowly (Ding et al., 2019;  
363 Seinfeld and Pandis, 2016). Therefore, the underlying reason why  $\text{TNH}_x$  concentrations lower than 60  
364  $\mu\text{g}/\text{m}^3$  and 40  $\mu\text{g}/\text{m}^3$  elevated the pH sensitivities (Fig. 6) to  $\text{TH}_2\text{SO}_4$  and  $\text{TNO}_3$  is that the Excess- $\text{NH}_x$   
365 will be exhausted under the case of  $\text{TH}_2\text{SO}_4$  and  $\text{TNO}_3$  that ranged from 10  $\mu\text{g}/\text{m}^3$  to 100  $\mu\text{g}/\text{m}^3$ ,  
366 respectively. On the other hand, the pH values of the five sites at the Required- $\text{NH}_x$  concentrations are  
367 near 3.0, which is in coincidence with the pH value of Beijing in the no-excess- $\text{NH}_x$  cases (Liu et al.,  
368 2017). Therefore, the presence of Excess- $\text{NH}_x$  in the aerosol was likely important for the less acidic of  
369  $\text{PM}_{2.5}$  and can enhance the pH values by 1.5 (U-ZZ)–2 (R-PY) units. Considering that the Excess- $\text{NH}_x$   
370 concentrations at rural sites (e.g.,  $30.1 \pm 6.2 \mu\text{g}/\text{m}^3$  at R-PY) were higher than those at urban sites (e.g.,  
371  $14.8 \pm 4.1 \mu\text{g}/\text{m}^3$  at U-ZZ), and thus Excess- $\text{NH}_x$  concentrations may drive the pH values of rural sites  
372 higher than those of urban sites.

### 373 3.5 Implications of regional transport

374 From the above discussion, the differences of pH among three cases indicate that the underlying  
375 influence of regional transport on local particle pH cannot be neglected by differing the chemical  
376 components of  $\text{PM}_{2.5}$  and meteorological conditions. In particular, the median pH values (Table S2) of  
377 Case 1, during when the air masses transported from the south of sampling regions, increased by 0.2–

378 0.9 units than those during Cases 2 and 3. Aqueous formations of sulfate are strongly dependent on  
379 particle pH. Chen et al. (2016) reported that the aqueous-phase sulfate production rates from NO<sub>2</sub> and  
380 O<sub>3</sub> oxidation of SO<sub>2</sub> had a positive correlation with particle pH during the Beijing haze events. When  
381 pH exceeded approximately 4.5 (higher than this value at rural sites in this work), NO<sub>2</sub>-oxidation  
382 dominated the sulfate formation, and its reaction rate increased by one order of magnitude with the  
383 rise of pH by one unit. Thus, air masses transported from rural and agricultural regions may promote  
384 the sulfate formation in urban aerosols. In addition to sulfate, higher aerosol pH favors partitioning of  
385 TNO<sub>3</sub> toward aerosol NO<sub>3</sub> rather than gaseous HNO<sub>3</sub> and thus elevating the particle mass  
386 concentration (Nenes et al., 2019; Weber et al., 2016). Sampling regions in this study are located in the  
387 transport route for Beijing (MEP, 2017), thereby frequently affecting its local particle pH. The lifetimes  
388 of NH<sub>3</sub> (1–5 days or less) and NH<sub>4</sub><sup>+</sup> (1–15 days) in the atmosphere are sufficient for transporting to  
389 Beijing during a haze episode (Aneja, 2000; Lefer et al., 1999; Warneck, 1988). Ding et al. (2019)  
390 have also observed that PM<sub>2.5</sub> pH from the southwest direction was generally higher than that from the  
391 northern direction in Beijing. Therefore, the particle pH in Beijing may be enhanced when southern  
392 air masses from this region accompany elevated-pH particles and high ammonia levels.

#### 393 4 Conclusions

394 An experiment was performed using a series of high-time-resolution instruments in two urban  
395 (i.e., U-ZZ and U-AY) and three rural sites (i.e., R-AY, R-XX, and R-PY) in Henan Province during a  
396 large-scale and long-lasting haze episode. The ISORROPIA-II model was used to investigate the pH  
397 value and its driving factors. PM<sub>2.5</sub> exhibited moderate acidity with median pH values of 4.5 (3.8–5.2),  
398 4.8 (3.9–5.8), 4.9 (4.1–6.2), 5.1 (4.7–6.3), and 5.2 (4.8–6.5,) at U-ZZ, U-AY, R-XX, R-AY, and R-PY,

399 respectively. The pH values at rural sites were slightly higher than those at urban sites.

400 The predicted pH values of  $PM_{2.5}$  were significantly affected by the WSIs levels, different  
401 proportions of particle- and gas-phase constituents, and meteorological parameters. Sensitivity tests  
402 show that  $TNH_x$ , followed by  $TH_2SO_4$ , were the important factors that influenced the predicted pH at  
403 the five sites. In addition, T was more sensitive to local pH than RH. Generally, particle pH rose with  
404 the increase in cation and the decrease in the anion, T, and RH. Further study suggests that predicted  
405 pH will be enhanced by increasing the  $TNO_3/TH_2SO_4$  ratio. Therefore, elevated  $TNH_x$  concentrations  
406 and lower T were probably responsible for the higher pH values at rural sites than those at urban sites,  
407 and higher  $TNH_x$  and  $TNO_3/TH_2SO_4$  ratios during Case 1 may lead to the higher pH values than those  
408 during Case 3.

409 An “S-curve” growth trend of pH to increasing  $TNH_x$  was found with the inflection point around  
410 the Required- $NH_x$  concentration. Moreover, the pH values of the five sites at the Required- $NH_x$   
411 concentrations are near 3.0, and the presence of Excess- $NH_x$  in the aerosol can enhance the pH values  
412 by 1.5 (U-ZZ)–2 (R-PY) units, and thus Excess- $NH_x$  was likely important for the less acidic of  $PM_{2.5}$   
413 during the severe haze episodes in this region. Considering that the Excess- $NH_x$  concentrations at rural  
414 sites were higher than those at urban sites, Excess- $NH_x$  concentrations may drive the pH values of rural  
415 sites higher than those of urban sites.

416 The underlying influence of regional transport on local particle pH cannot be neglected by  
417 differing the chemical components of  $PM_{2.5}$  and meteorological conditions. Air masses transported  
418 from rural and agricultural regions with elevated pH particles and high ammonia levels may promote  
419 the secondary particle formation in urban aerosols. Therefore, ammonia should be involved in the



420 regional strategy for improving the air quality in China.

421

422 *Data availability. All data in this work are available by contacting the corresponding author Shasha*

423 *Yin ([shashayin@zzu.edu.cn](mailto:shashayin@zzu.edu.cn))*

424

425 *Author contributions. Shasha Yin and Ruiqin Zhang designed and led this study. Shasha Yin was*

426 *responsible for all observations and data collection. Lingling Wang, Yuqing Li, Chen Wang, and Weisi*

427 *Wang interpreted the data and discussed the results. Shenbo Wang wrote the paper.*

428

429 *Competing interests. The authors declare that they have no conflict of interest.*

#### 430 **Acknowledgment**

431 This work was supported by the National Key R&D Program of China (No. 2017YFC0212403)

432 and the National Natural Science Foundation of China (No. 41907187). We thank Qi Hao and Liuming

433 Yang for their contributions to the field observations.

#### 434 **References**

435 Allen, H. M., Draper, D. C., Ayres, B. R., Ault, A., Bondy, A., Takahama, S., Modini, R. L., Baumann,

436 K., Edgerton, E., Knote, C., Laskin, A., Wang, B., and Fry, J. L.: Influence of crustal dust and sea

437 spray supermicron particle concentrations and acidity on inorganic  $\text{NO}_3^-$  aerosol during the 2013

438 Southern Oxidant and Aerosol Study. *Atmos. Chem. Phys.*, 15, 10669–10685, 2015.

439 Aneja, V. P., Chauhan, J. P., Walker, J. T.: Characterization of atmospheric ammonia emissions from

440 swine waste storage and treatment lagoons. *J. Geophys. Res.-Atmos.*, 105, 11535–11545, 2000.

441 Battaglia, M. A., Douglas, S., and Hennigan, C. J.: Effect of the urban heat island on aerosol pH,  
442 Environ. Sci. Technol., 51, 13095–13103, 2017.

443 Behera, S. N., Betha, R., Liu, P., Balasubramanian, R.: A study of diurnal variations of PM<sub>2.5</sub> acidity  
444 and related chemical species using a new thermodynamic equilibrium model. Sci. Total Environ.,  
445 452, 286–295, 2013.

446 Boucher, O., Anderson, T. L.: General circulation model assessment of the sensitivity of direct climate  
447 forcing by anthropogenic sulfate aerosols to aerosol size and chemistry. J. Geophys. Res.-Atmos.,  
448 100, 26117–26134, 1995.

449 Bougiatioti, A., Nikolaou, P., Stavroulas, I., Kouvarakis, G., Weber, R., Nenes, A., Kanakidou, M.,  
450 Mihalopoulos, N.: Particle water and pH in the eastern Mediterranean: source variability and  
451 implications for nutrient availability. Atmos. Chem. Phys., 16, 4579–4591, 2016.

452 Bureau of Statistics of Henan (NBH), 2018. Henan Statistical Yearbook. China Statistics Press, Beijing.  
453 Accessed date: Dec. 2019.

454 Cheng, Y., Zheng, G., Wei, C., Mu, Q., Zheng, B., Wang, Z., Gao, M., Zhang, Q., He, K., Carmichael,  
455 G.: Reactive nitrogen chemistry in aerosol water as a source of sulfate during haze events in China.  
456 Sci. Adv., 2, e1601530–e1601530, 2016.

457 Clegg, S. L., Brimblecombe, P., Wexler, A. S.: The thermodynamic model of the system  
458 H<sup>+</sup>–NH<sub>4</sub><sup>+</sup>–SO<sub>4</sub><sup>2-</sup>–NO<sub>3</sub><sup>-</sup>–H<sub>2</sub>O at tropospheric temperatures. J. Phys. Chem. A, 102, 2137–2154,  
459 1998.

460 Ding, J., Zhao, P., Su, J., Dong, Q., Du, X., Zhang, Y.: Aerosol pH and its driving factors in Beijing.  
461 Atmos. Chem. Phys., 19, 7939–7954, 2019.

462 Dockery, D. W., Cunningham, J., Damokosh, A. L., Neas, L. M., Spengler, J. D., Koutrakis, P., Ware,  
463 J. H., Raizenne, M., Speizer, F. E.: Health effects of acid aerosols on North American children:  
464 respiratory symptoms. *Environ. Health Persp.*, 104, 500–505, 1996.

465 Guo, H., Sullivan, A. P., Campuzanojost, P., Schroder, J. C., Lopezhilfiker, F. D., Dibb, J. E., Jimenez,  
466 J. L., Thornton, J. A., Brown, S. S., Nenes, A.: Fine particle pH and the partitioning of nitric acid  
467 during winter in the northeastern United States. *J. Geophys. Res.-Atmos.*, 121, 10–355, 2016.

468 Guo, H., Weber, R. J., Nenes, A.: High levels of ammonia do not raise fine particle pH sufficiently to  
469 yield nitrogen oxide-dominated sulfate production. *Sci. Rep.*, 7, 12109, 2017.

470 Guo, H., Xu, L., Bougiatioti, A., Cerully, K. M., Capps, S. L., Hite, J. R., Carlton, A. G., Lee, S., Bergin,  
471 M. H., Ng, N. L.: Fine-particle water and pH in the southeastern United States. *Atmos. Chem.*  
472 *Phy.*, 15, 5211–5228, 2015.

473 Guo, H., Nenes, A., and Weber, R. J.: The underappreciated role of nonvolatile cations on aerosol  
474 ammonium-sulfate molar ratios, *Atmos. Chem. Phys.*, 18, 17307–17323, 2018.

475 Haskins, J. D., Jaegle, L., Shah, V., Lee, B. H., Lopez-Hilfiker, F. D., Campuzano-Jost, P., Schroder, J.  
476 C., Day, D. A., Guo, H. Y., Sullivan, A. P., Weber, R., Dibb, J., Campos, T., Jimenez, J. L., Brown,  
477 S. S., and Thornton, J. A.: Wintertime gas-particle partitioning and speciation of inorganic  
478 chlorine in the lower troposphere over the northeast United States and coastal ocean, *J. Geophys.*  
479 *Res.-Atmos.*, 123, 12897–12916, 2018

480 Healy, R. M., Sciare, J., Poulain, L., Crippa, M., Wiedensohler, A., Prévôt, A. S. H., Baltensperger, U.,  
481 Sarda-Estève, R., McGuire, M. L., Jeong, C.-H., McGillicuddy, E., O'Connor, I. P., Sodeau, J. R.,  
482 Evans, G. J., and Wenger, J. C.: Quantitative determination of carbonaceous particle mixing state

483 in Paris using single-particle mass spectrometer and aerosol mass spectrometer measurements,  
484 *Atmos. Chem. Phys.*, 13, 9479–9496, 2013.

485 Hennigan, C. J., Izumi, J., Sullivan, A. P., Weber, R. J., and Nenes, A.: A critical evaluation of proxy  
486 methods used to estimate the acidity of atmospheric particles, *Atmos. Chem. Phys.*, 15, 2775–  
487 2790, 2015.

488 Hu, G., Zhang, Y., Sun, J., Zhang, L., Shen, X., Lin, W., Yang, Y.: Variability, formation and acidity of  
489 water-soluble ions in PM<sub>2.5</sub> in Beijing based on the semi-continuous observations. *Atmos. Res.*,  
490 145, 1–11, 2014.

491 Huang, X., Song, Y., Li, M., Li, J., Huo, Q., Cai, X., Zhu, T., Hu, M., Zhang, H.: A high-resolution  
492 ammonia emission inventory in China. *Global Biogeochem. Cy.*, 26, GB1030, 2012.

493 Larssen, T., Lydersen, E., Tang, D., He, Y., Gao, J., Liu, H., Duan, L., Seip, H .M., Vogt, R. D., Mulder,  
494 J.: Acid rain in China. *Environ. Sci. Technol.*, 40, 418–425, 2006.

495 Lefer, B. L., Talbot, R. W., Munger, J. W.: Nitric acid and ammonia at a rural northeastern US site. *J.*  
496 *Geophys. Res.-Atmos.*, 104, 1645–1661, 1999.

497 Li, Y. J., Sun, Y., Zhang, Q., Li, X., Li, M., Zhou, Z., Chan, C. K.: Real-time chemical characterization  
498 of atmospheric particulate matter in China: A review. *Atmos. Environ.*, 158, 270–304, 2006.

499 Liu, J., Bergin, M., Guo, H., King, L., Kotra, N., Edgerton, E., Weber, R. J.: Size-resolved  
500 measurements of brown carbon in water and methanol extracts and estimates of their contribution  
501 to ambient fine-particle light absorption. *Atmos. Chem. Phys.*, 13, 12389–12404, 2013.

502 Liu, M., Song, Y., Zhou, T., Xu, Z., Yan, C., Zheng, M., Wu, Z., Hu, M., Wu, Y., Zhu, T.: Fine particle  
503 pH during severe haze episodes in northern China. *Geophys. Res. Lett.*, 44, 5213–5221, 2017.

504 Liu, W., Lin, S., and Hu, G.: Characterizing remarkable changes of severe haze events and chemical  
505 compositions in multi-size airborne particles (PM<sub>1</sub>, PM<sub>2.5</sub> and PM<sub>10</sub>) from January 2013 to  
506 2016–2017 winter in Beijing, China, *Atmos. Environ.*, 189, 133–144, 2018.

507 Markovic, M. Z., Vandenboer, T. C., Murphy, J. G.: Characterization and optimization of an online  
508 system for the simultaneous measurement of atmospheric water-soluble constituents in the gas  
509 and particle phases. *J Environ. Monitor.*, 14, 1872–1884, 2012.

510 Meng, Z., Lin, W., Jiang, X., Yan, P., Wang, Y., Zhang, Y. M., Jia, X. F., Yu, X. L.: Characteristics of  
511 atmospheric ammonia over Beijing, China. *Atmos. Chem. Phys.*, 11, 6139–6151, 2011.

512 Meng, Z., Xu, X., Lin, W., Ge, B., Xie, Y., Song, B., Jia, S., Zhang, R., Peng, W., Wang, Y.: Role of  
513 ambient ammonia in particulate ammonium formation at a rural site in the North China Plain.  
514 *Atmos. Chem. Phys.*, 18, 167–184, 2017.

515 MEP: 2017 air pollution prevention and management plan for the Beijing-Tianjin-Hebei region and its  
516 surrounding areas, [http://dqhj.mee.gov.cn/dtxx/201703/t20170323\\_408663.shtml](http://dqhj.mee.gov.cn/dtxx/201703/t20170323_408663.shtml) (last access: 18  
517 August 2019), 2017.

518 Meskhidze, N., Chameides, W. L., Nenes, A., Chen, G.: Iron mobilization in mineral dust: Can  
519 anthropogenic SO<sub>2</sub> emissions affect ocean productivity? *Geophys. Res. Lett.*, 30, 2003.

520 Murphy, J. G., Gregoire, P. K., Tevlin, A. G., Wentworth, G. R., Ellis, R. A., Markovic, M. Z.,  
521 VandenBoer, T. C.: Observational constraints on particle acidity using measurements and  
522 modelling of particles and gases, *Faraday Discuss.*, 200, 379–395, 2017.

523 Nah, T., Guo, H., Sullivan, A. P., Chen, Y., Tanner, D. J., Nenes, A., Russell, A., Ng, L. N., Huey, L.  
524 G., Weber, R. J.: Characterization of aerosol composition, aerosol acidity, and organic acid

525 partitioning at an agriculturally intensive rural southeastern US site. *Atmos. Chem. Phys.* 18,  
526 11471–11491. 2018.

527 National Bureau of Statistics (NBS), 2016. *China Statistical Yearbook*. China Statistics Press, Beijing.  
528 Accessed date: Sept. 2019.

529 Nenes, A., Pandis, S. N., Pilinis, C.: ISORROPIA: A new thermodynamic equilibrium model for  
530 multiphase multicomponent inorganic aerosols. *Aquat. Geochem.*, 4, 123–152, 1998.

531 Nenes, A., Pandis, S. N., Weber, R. J., and Russell, A.: Aerosol pH and liquid water content determine  
532 when particulate matter is sensitive to ammonia and nitrate availability, *Atmos. Chem. Phys.*  
533 *Discuss.*, in review, 2019.

534 Ostro, B., Lipsett, M., Wiener, M.B., Selner, J.C.: Asthmatic responses to airborne acid aerosols. *Am.*  
535 *J. Public Health*, 81, 694–702, 1991.

536 Panteliadis, P., Hafkenscheid, T., Cary, B., Diapouli, E., Fischer, A., Favez, O., Quincey, P., Viana, M.,  
537 Hitzenberger, R., Vecchi, R.: ECOC comparison exercise with identical thermal protocols after  
538 temperature offset correction: instrument diagnostics by in-depth evaluation of operational  
539 parameters. *Atmos. Meas. Tech.*, 8, 779–792, 2014.

540 Pathak, R. K., Louie, P. K., Chan, C. K.: Characteristics of aerosol acidity in Hong Kong. *Atmos.*  
541 *Environ.*, 38, 2965–2974, 2004.

542 Pathak, R.K., Wu, W.S., Wang, T.: Summertime PM<sub>2.5</sub> ionic species in four major cities of China:  
543 nitrate formation in an ammonia-deficient atmosphere. *Atmos. Chem. Phys.* 9, 1711–1722, 2008.

544 Pye, H. O. T., Nenes, A., Alexander, B., Ault, A. P., Barth, M. C., Clegg, S. L., Collett Jr., J. L., Fahey,  
545 K. M., Hennigan, C. J., Herrmann, H., Kanakidou, M., Kelly, J. T., Ku, I.-T., McNeill, V. F.,

546 Riemer, N., Schaefer, T., Shi, G., Tilgner, A., Walker, J. T., Wang, T., Weber, R., Xing, J., Zaveri,  
547 R. A., and Zuend, A.: The acidity of atmospheric particles and clouds, *Atmos. Chem. Phys.*  
548 *Discuss., in review*, 2019.

549 Rumsey, I. C., Cowen, K. A., Walker, J. T., Kelly, T. J., Hanft, E. A., Mishoe, K., Rogers, C., Proost,  
550 R., Beachley, G. M., Lear, G.: An assessment of the performance of the Monitor for AeRosols  
551 and GAses in ambient air (MARGA): a semi-continuous method for soluble compounds. *Atmos.*  
552 *Chem. Phy.*, 14, 5639–5658, 2014.

553 Saraswati, Sharma, S. K., Saxena, M., Mandal, T. K.: Characteristics of gaseous and particulate  
554 ammonia and their role in the formation of secondary inorganic particulate matter at Delhi, India.  
555 *Atmos. Res.*, 218, 34–49, 2019.

556 Seinfeld, J. H. and Pandis, S. N.: *Atmospheric Chemistry and Physics: From Air Pollution to Climate*  
557 *Change*, 2nd Edition, John Wiley and Sons, Inc., Hoboken, New Jersey, USA, 2006.

558 Seinfeld, J. H. and Pandis, S. N.: *Atmospheric Chemistry and Physics: From Air Pollution to Climate*  
559 *Change* (3rd edition), John Wiley and Sons, Inc., Hoboken, New Jersey, USA, 2016.

560 Shen, J., Liu, X., Ying, Z., Fangmeier, A., Goulding, K., Zhang, F.: Atmospheric ammonia and  
561 particulate ammonium from agricultural sources in the North China Plain. *Atmos. Environ.*, 45,  
562 5033–5041, 2011.

563 Shi, G., Xu, J., Peng, X., Xiao, Z., Chen, K., Tian, Y., Guan, X., Feng, Y., Yu, H., Nenes, A.: pH of  
564 aerosols in a polluted atmosphere: source contributions to highly acidic aerosol. *Environ. Sci.*  
565 *Technol.*, 51, 4289–4296, 2017.

566 Shi, X., Nenes, A., Xiao, Z., Song, S., Yu, H., Shi, G., Zhao, Q., Chen, K., Feng, Y., Russell, A. G.:

567 High-resolution data sets unravel the effects of sources and meteorological conditions on nitrate  
568 and its gas-particle partitioning. *Environ. Sci. Technol.*, 53, 3048–3057, 2019.

569 Shi, Z., Bonneville, S., Krom, M. D., Carslaw, K. S., Jickells, T. D., Baker, A. R., Benning, L. G.: Iron  
570 dissolution kinetics of mineral dust at low pH during simulated atmospheric processing. *Atmos.*  
571 *Chem. Phys.*, 11, 995–1007, 2010.

572 Song, S., Gao, M., Xu, W., Shao, J., Shi, G., Wang, S., Wang, Y., Sun, Y., Mcelroy, M. B.: Fine particle  
573 pH for Beijing winter haze as inferred from different thermodynamic equilibrium models. *Atmos.*  
574 *Chem. Phys.*, 18, 7423–7438, 2018.

575 Spurny, K. R.: Atmospheric acidic aerosols (review). *J Aerosol Sci.*, 21, 1990.

576 Surratt, J. D., Chan, A. W. H., Eddingsaas, N. C., Chan, M. N., Loza, C. L., Kwan, A. J., Hersey, S.,  
577 Flagan, R. C., Wennberg, P. O., Seinfeld, J. H.: Reactive intermediates revealed in secondary  
578 organic aerosol formation from isoprene. *P. Natl. Acad. Sci. USA.*, 107, 6640–6645, 2010.

579 Tao, Y. and Murphy, J. G.: The sensitivity of PM<sub>2.5</sub> acidity to meteorological parameters and chemical  
580 composition changes: 10-year records from six Canadian monitoring sites. *Atmos. Chem. Phys.*  
581 19, 9309–9320, 2019.

582 Tian, M., Wang, H., Chen, Y., Zhang, L., Shi, G., Liu, Y., Yu, J., Zhai, C., Wang, J., Yang, F.: Highly  
583 time-resolved characterization of water-soluble inorganic ions in PM<sub>2.5</sub> in a humid and acidic  
584 mega city in Sichuan Basin, China. *Sci. Total Environ.*, 580, 224–234, 2017.

585 Vasilakos, P., Russell, A., Weber, R., and Nenes, A.: Understanding nitrate formation in a world with  
586 less sulfate, *Atmos. Chem. Phys.*, 18, 12765–12775, 2018.

587 Wang, C., Yin, S., Bai, L., Zhang, X., Gu, X., Zhang, H., Lu, Q., Zhang, R.: High-resolution ammonia



588 emission inventories with comprehensive analysis and evaluation in Henan, China, 2006–2016.  
589 *Atmos. Environ.*, 193, 11–23, 2018a.

590 Wang, G., Zhang, F., Peng, J., Duan, L., Ji, Y., Marreroortiz, W., Wang, J., Li, J., Wu, C., Cao, C.:  
591 Particle acidity and sulfate production during severe haze events in China cannot be reliably  
592 inferred by assuming a mixture of inorganic salts. *Atmos. Chem. Phys.*, 18, 1–23, 2018b.

593 Wang, G., Zhang, R., Gomez, M. E., Yang, L., Levy, Z. M., Hu, M., Lin, Y., Peng, J., Guo, S., Meng,  
594 J.: Persistent sulfate formation from London Fog to Chinese haze. *P. Natl. Acad. Sci. USA.*, 113,  
595 13630–13635, 2016.

596 Wang, H., Ding, J., Xu, J., Wen, J., Han, J., Wang, K., Shi, G., Feng, Y., Ivey, C., Wang, Y.: Aerosols  
597 in an arid environment: The role of aerosol water content, particulate acidity, precursors, and  
598 relative humidity on secondary inorganic aerosols. *Sci. Total Environ.*, 646, 564–572, 2019a.

599 Wang, J., Zhao, B., Wang, S., Yang, F., Xing, J., Morawska, L., Ding, A., Kulmala, M., Kerminen, V.,  
600 Kujansuu, J.: Particulate matter pollution over China and the effects of control policies. *Sci. Total*  
601 *Environ.*, 584, 426–447, 2017.

602 Wang, S., He, B., Yuan, M., Su, F., Yin, S., Yan, Q., Jiang, N., Zhang, R., Tang, X.: Characterization  
603 of individual particles and meteorological conditions during the cold season in Zhengzhou using  
604 a single particle aerosol mass spectrometer. *Atmos. Res.*, 219, 13–23, 2019b.

605 Wang, S., Yan, Q., Yu, F., Wang, Q., Yang, L., Zhang, R., Yin, S., Wang, S., Yan, Q., Yu, F.: Distribution  
606 and source of chemical elements in size-resolved particles in Zhengzhou, China: Effects of  
607 regional transport. *Aerosol Air Qual. Res.*, 18, 371–385, 2018c.

608 Wang, S., Yin, S., Zhang, R., Yang, L., Zhao, Q., Zhang, L., Yan, Q., Jiang, N., Tang, X.: Insight into

609 the formation of secondary inorganic aerosol based on high-time-resolution data during haze  
610 episodes and snowfall periods in Zhengzhou, China. *Sci. Total Environ.*, 660, 47–56, 2019c.

611 Warneck, P.: *Chemistry of the Natural Atmosphere*, Academic Press, San Diego, CA, 1988.

612 Watson, J. G.: Visibility: science and regulation. *J Air Waste Manage.*, 52, 973–999, 2002.

613 Weber, R. J., Guo, H., Russell, A. G., and Nenes, A.: High aerosol acidity despite declining  
614 atmospheric sulfate concentrations over the past 15 years, *Nat. Geosci.*, 9, 282–285, 2016.

615 Wen, L., Chen, J., Yang, L., Wang, X., Xu, C., Sui, X., Yao, L., Zhu, Y., Zhang, J., Zhu, T.: Enhanced  
616 formation of fine particulate nitrate at a rural site on the North China Plain in summer: The  
617 important roles of ammonia and ozone. *Atmos. Environ.*, 101, 294–302, 2015.

618 Xie, Y., Wang, G., Wang, X., Chen, J., Chen, Y., Tang, G., Wang, L., Ge, S., Xue, G., Wang, Y., and  
619 Gao, J.: Observation of nitrate dominant PM<sub>2.5</sub> and particle pH elevation in urban Beijing during  
620 the winter of 2017, *Atmos. Chem. Phys. Discuss.*, in review, 2019.

621

622 **Figure lists:**

623 Fig. 1 pH uncertainties of the five sites based on two extreme scenarios of measurement uncertainty.  
624 Cations and organic carbon concentrations (OC) were adjusted up to within their maximum positive  
625 uncertainties, anions, relative humidity (RH) and temperature (T) were adjusted down within their  
626 maximum negative uncertainties, which represented the  $\text{pH}_{\text{max}}$  case; for  $\text{pH}_{\text{min}}$  case, cations and OC  
627 concentrations were adjusted down, and anions, RH and T were adjusted up. The color scale bar  
628 represents adjusted RH.

629 Fig. 2 Temporal variations of T, RH, wind speed (WS), wind direction (WD), and concentrations of  
630  $\text{NH}_3$ ,  $\text{NH}_4^+$ ,  $\text{SO}_4^{2-}$ , and  $\text{NO}_3^-$  during three cases at the Zhengzhou (U-ZZ) site. The shaded areas  
631 represent the measurement uncertainties.

632 Fig. 3 Time series and box plot of predicted  $\text{PM}_{2.5}$  pH,  $\text{H}^+_{\text{air}}$ , and aerosol water content (AWC) at the  
633 five sites. In each box, the top, middle and bottom lines represent the 75th, 50th, and 25th percentile  
634 of statistical data, respectively; the upper and lower whiskers represent the maximum and minimum  
635 values, respectively.

636 Fig. 4 (a)–(e) Diurnal patterns of median pH values, (f) average RH, and T of the five sites in Case 2.  
637 The upper and lower ends of the line represent the maximum and minimum values of pH,  
638 respectively. The color scale bar represents AWC concentration.

639 Fig. 5 Comparison of the sensitivities of  $\text{PM}_{2.5}$  pH to T, RH, TCl ( $\text{HCl}_{(\text{g})} + \text{Cl}_{(\text{aq})}^-$ ),  $\text{TNH}_x$  ( $\text{NH}_{3(\text{g})} +$   
640  $\text{NH}_{4(\text{aq})}^+$ ),  $\text{TNO}_3$  ( $\text{HNO}_{3(\text{g})} + \text{NO}_{3(\text{aq})}^-$ ), and  $\text{TH}_2\text{SO}_4$  (replaced by observed  $\text{SO}_4^{2-}$ ) among the five  
641 sites. A given range for a variable for all sites with corresponding average values of other parameters  
642 was used as input to the ISORROPIA-II model. The range of the x-axis is close to the observed

643 minimum and maximum values in Case 2 (Table S4). The color scale bar represents the pH values.  
644 The relative standard deviation (RSD) and range (Range) represent the sensitivity degree of pH to  
645 this variable and range (min–max) of the re-predicted pH value in the test, respectively. The square  
646 plots on the graph represent the average values of each variable observed in Case 2 with standard  
647 deviation as an error bar.

648 Fig. 6 Particle pH calculated with fixed meteorological parameters ( $T = 275.5$  K and  $RH = 60$  %)  
649 under different combinations of  $TNH_x$  and (a)  $TH_2SO_4$  (Fixed  $TNO_3 = 67.5$   $\mu g/m^3$ ) and (b)  $TNO_3$   
650 (Fixed  $TH_2SO_4 = 36.5$   $\mu g/m^3$ ). The color scale bar represents the pH values. The markers on the  
651 graph represent the average concentrations of  $TNH_x$ ,  $TH_2SO_4$ , and  $TNO_3$  at the five sites during Case  
652 2 with standard deviation as error bar.

653 Fig. 7 Particle pH corresponds to increasing  $TNH_x$  at the five sites to examine the effects of major  
654 indicators of  $NH_3$  (i.e.,  $TNH_x$ , Required- $NH_x$ , and Excess- $NH_x$ ) on aerosol acidity. Particle pH was  
655 calculated by using a wide range of  $TNH_x$  (25–130  $\mu g/m^3$ ) and average values of other parameters  
656 during Case 2 of each site. The concentrations of  $TNH_x$ , Required- $NH_x$ , and Excess- $NH_x$  with  
657 corresponding pH values are marked by a hollow box, hollow circle, and arrow respectively. The  
658 yellow and blue background colors correspond to the  $NH_x$ -poor and  $NH_x$ -rich, respectively.

659

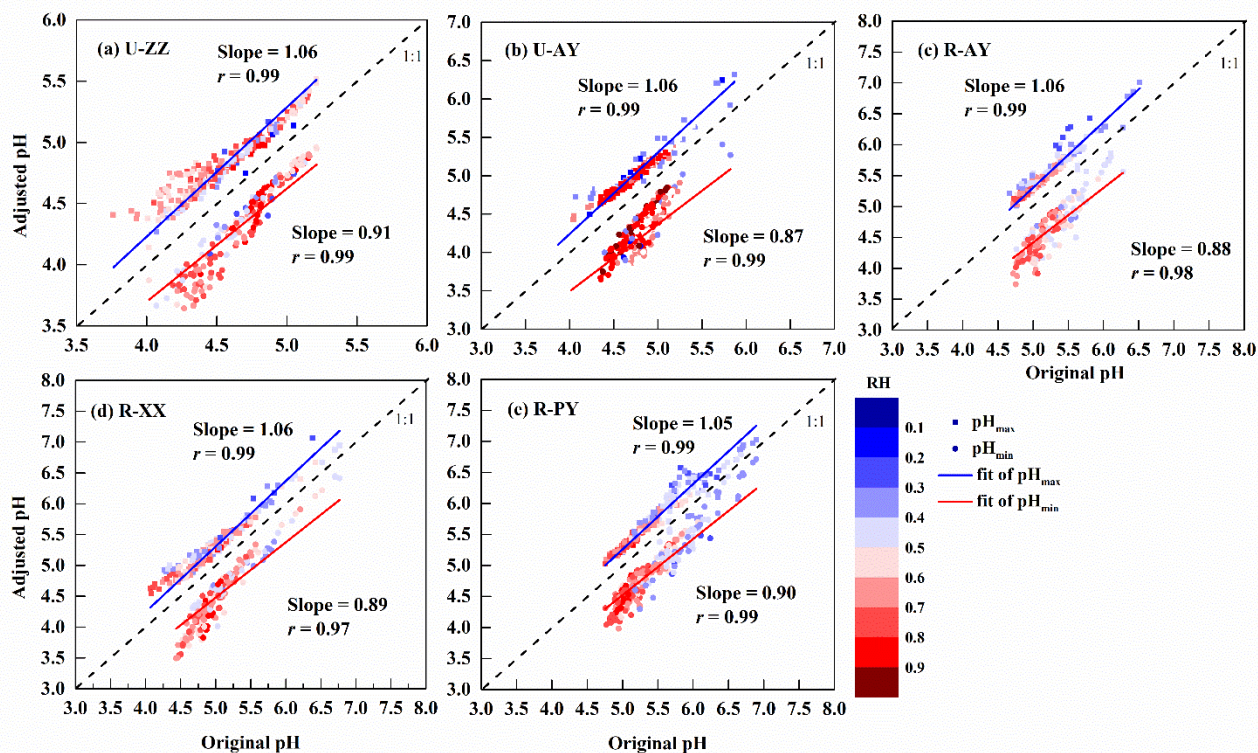

660

661 Fig. 1 pH uncertainties of the five sites based on two extreme scenarios of measurement uncertainty.

662 Cations and organic carbon concentrations (OC) were adjusted up to within their maximum positive

663 uncertainties, anions, relative humidity (RH) and temperature (T) were adjusted down within their

664 maximum negative uncertainties, which represented the  $pH_{max}$  case; for  $pH_{min}$  case, cations and OC

665 concentrations were adjusted down, and anions, RH and T were adjusted up. The color scale bar

666 represents adjusted RH.

667

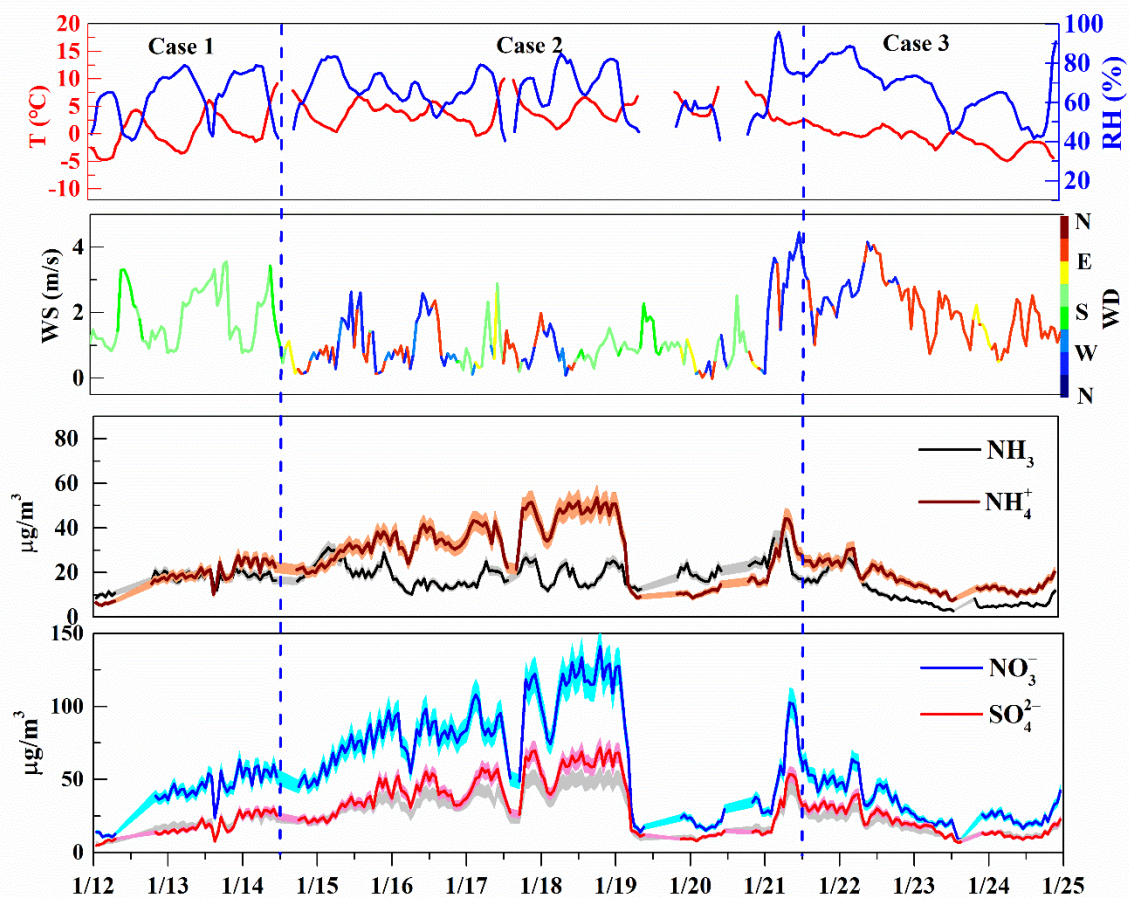

668

669 Fig. 2 Temporal variations of T, RH, wind speed (WS), wind direction (WD), and concentrations of

670  $\text{NH}_3$ ,  $\text{NH}_4^+$ ,  $\text{SO}_4^{2-}$ , and  $\text{NO}_3^-$  during three cases at the Zhengzhou (U-ZZ) site. The shaded areas

671 represent the measurement uncertainties.

672

673

674



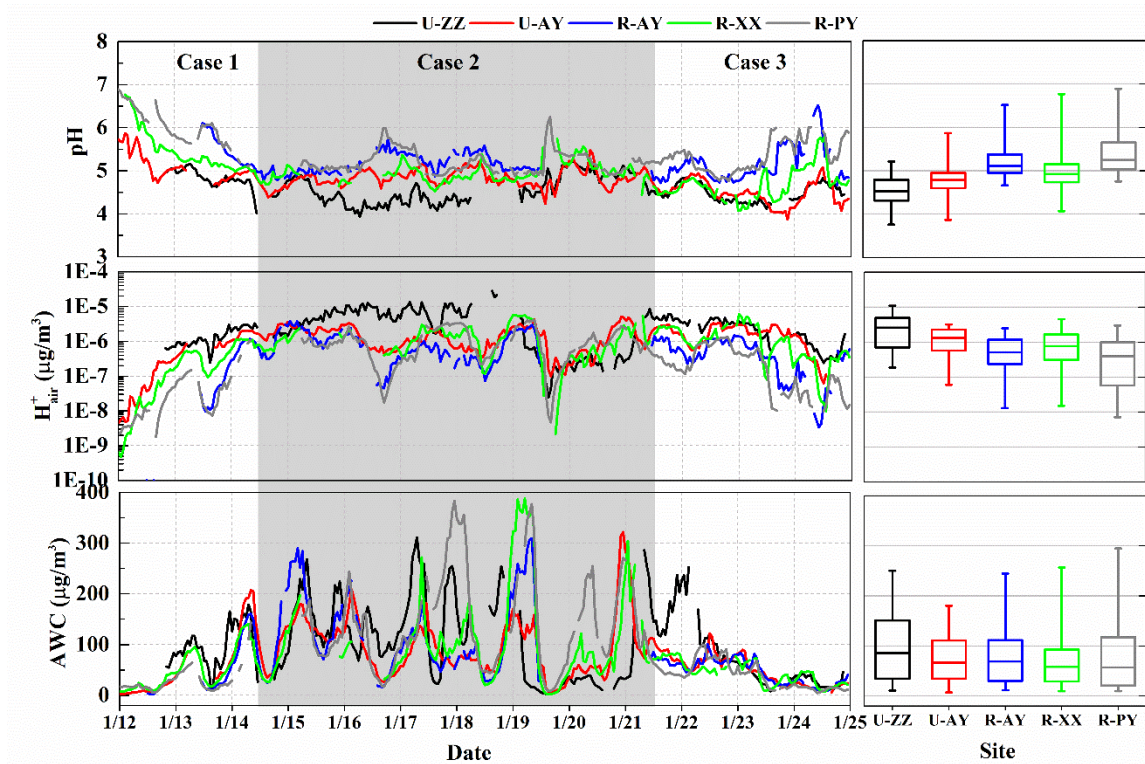

675

676 Fig. 3 Time series and box plot of predicted  $PM_{2.5}$  pH,  $H^+_{air}$ , and aerosol water content (AWC) at the  
 677 five sites. In each box, the top, middle and bottom lines represent the 75th, 50th, and 25th percentile  
 678 of statistical data, respectively; the upper and lower whiskers represent the maximum and minimum  
 679 values, respectively.

680

681

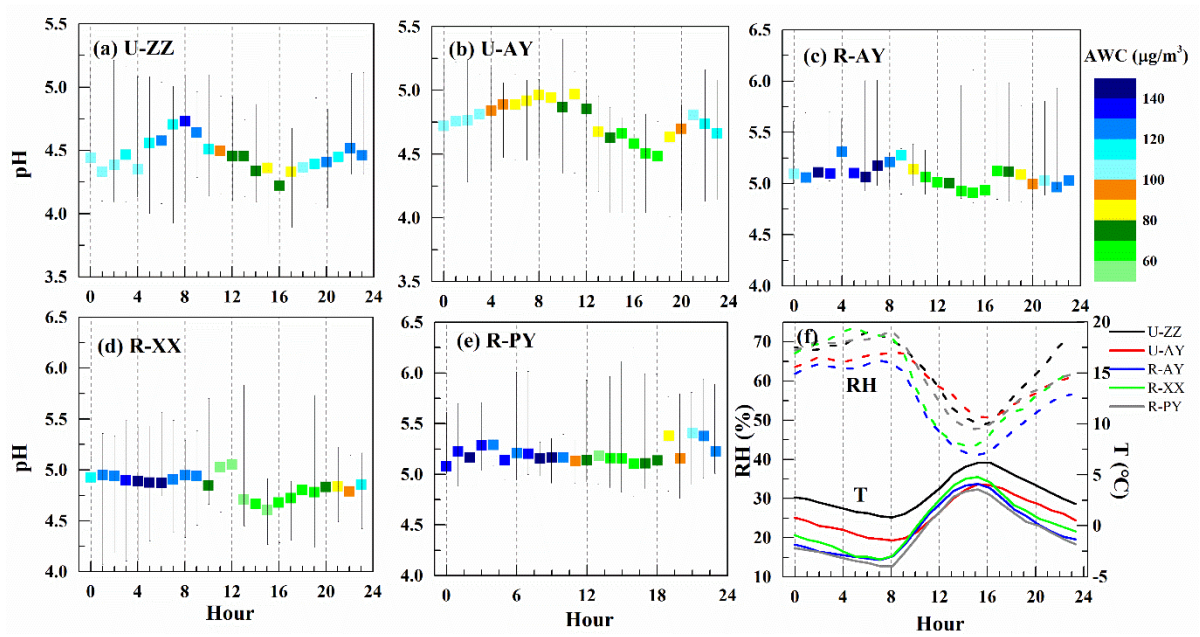

682

683 Fig. 4 (a)–(e) Diurnal patterns of median pH values, (f) average RH, and T of the five sites in Case 2.

684 The upper and lower ends of the line represent the maximum and minimum values of pH,

685 respectively. The color scale bar represents AWC concentration.

686

687

688

689



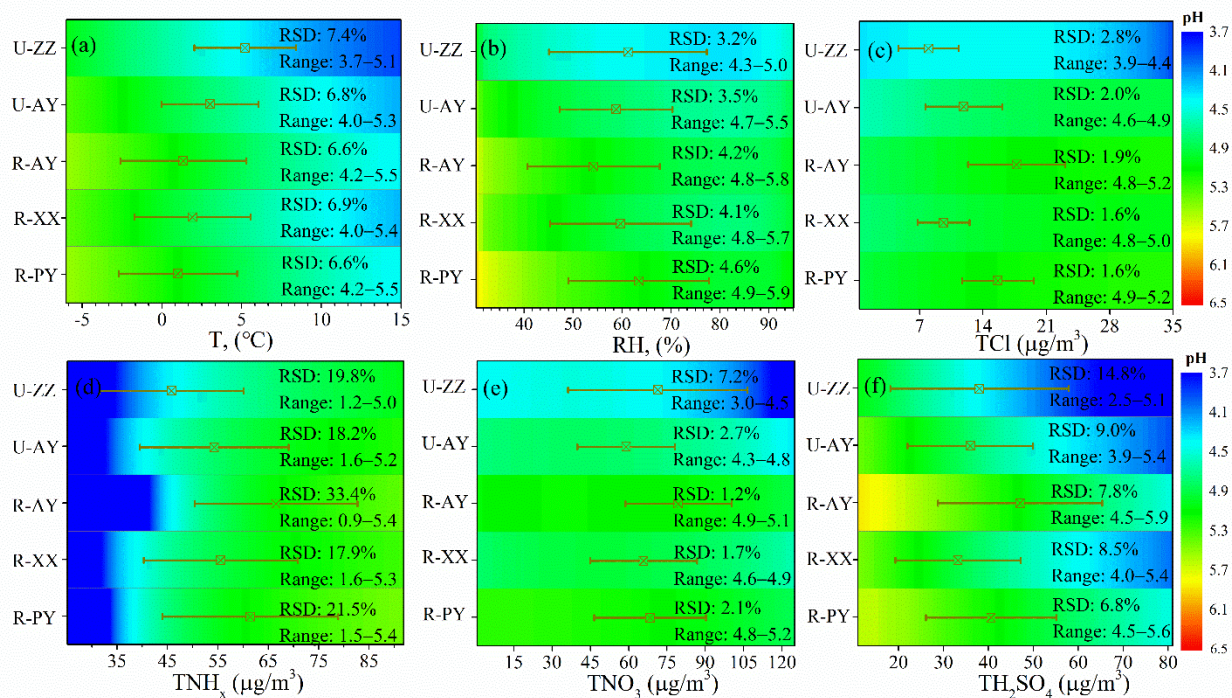

690

691 Fig. 5 Comparison of the sensitivities of PM<sub>2.5</sub> pH to T, RH, TCl (HCl<sub>(g)</sub> + Cl<sub>(aq)</sub><sup>-</sup>), TNH<sub>x</sub> (NH<sub>3(g)</sub> +

692 NH<sub>4(aq)</sub><sup>+</sup>), TNO<sub>3</sub> (HNO<sub>3(g)</sub> + NO<sub>3(aq)</sub><sup>-</sup>), and TH<sub>2</sub>SO<sub>4</sub> (replaced by observed SO<sub>4</sub><sup>2-</sup>) among the five

693 sites. A given range for a variable for all sites with corresponding average values of other parameters

694 was used as input to the ISORROPIA-II model. The range of the x-axis is close to the observed

695 minimum and maximum values in Case 2 (Table S4). The color scale bar represents the pH values.

696 The relative standard deviation (RSD) and range (Range) represent the sensitivity degree of pH to

697 this variable and range (min–max) of the re-predicted pH value in the test, respectively. The square

698 plots on the graph represent the average values of each variable observed in Case 2 with standard

699 deviation as an error bar.

700

701

702

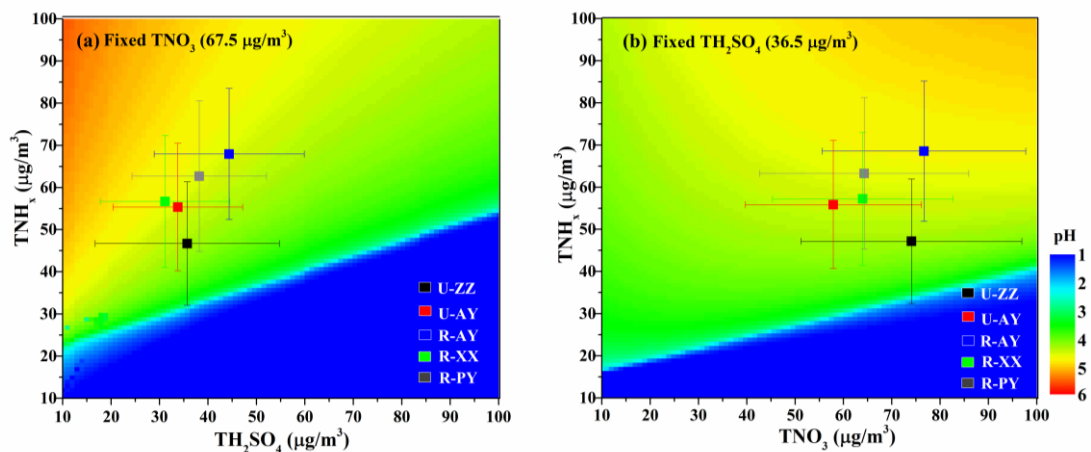

703

704 Fig. 6 Particle pH calculated with fixed meteorological parameters ( $T = 275.5 \text{ K}$  and  $\text{RH} = 60 \%$ )

705 under different combinations of  $\text{TNH}_x$  and (a)  $\text{TH}_2\text{SO}_4$  (Fixed  $\text{TNO}_3 = 67.5 \mu\text{g}/\text{m}^3$ ) and (b)  $\text{TNO}_3$

706 (Fixed  $\text{TH}_2\text{SO}_4 = 36.5 \mu\text{g}/\text{m}^3$ ). The color scale bar represents the pH values. The markers on the

707 graph represent the average concentrations of  $\text{TNH}_x$ ,  $\text{TH}_2\text{SO}_4$ , and  $\text{TNO}_3$  at the five sites during Case

708 2 with standard deviation as error bar.

709

710

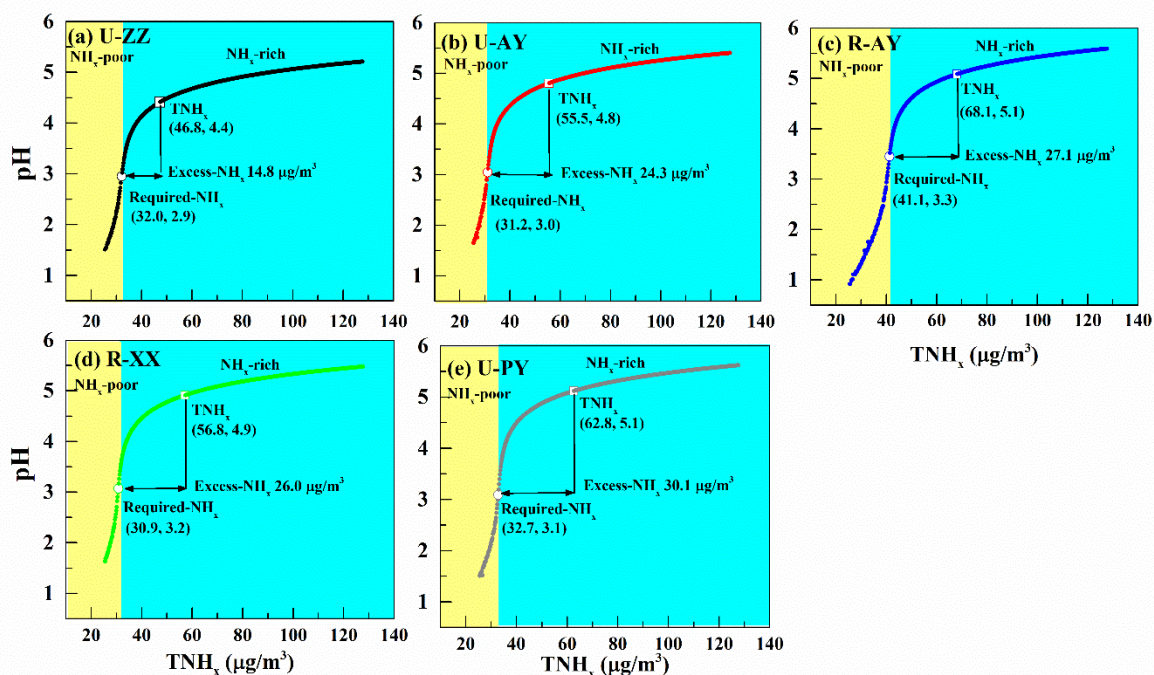

711

712 Fig. 7 Particle pH corresponds to increasing TNH<sub>x</sub> at the five sites to examine the effects of major

713 indicators of NH<sub>3</sub> (i.e., TNH<sub>x</sub>, Required-NH<sub>x</sub>, and Excess-NH<sub>x</sub>) on aerosol acidity. Particle pH was

714 calculated by using a wide range of TNH<sub>x</sub> (25–130 μg/m<sup>3</sup>) and average values of other parameters

715 during Case 2 of each site. The concentrations of TNH<sub>x</sub>, Required-NH<sub>x</sub>, and Excess-NH<sub>x</sub> with

716 corresponding pH values are marked by a hollow box, hollow circle, and arrow respectively. The

717 yellow and blue background colors correspond to the NH<sub>x</sub>-poor and NH<sub>x</sub>-rich, respectively.

718

719

**Table lists:**

Table 1 Comparison of the particle pH values in this study (median, min–max) and other sites (mean  $\pm$  standard deviation).

Table 2 Descriptions of the five sampling sites.

Table 3 Summary (mean  $\pm$  standard deviation) of gaseous precursors ( $\mu\text{g}/\text{m}^3$ ), water-soluble inorganic ions ( $\mu\text{g}/\text{m}^3$ ), T ( $^{\circ}\text{C}$ ), and RH (%) during three cases of haze periods at five monitoring sites.

Table 4 Sensitivity of pH to input data. The real-time measured values of a variable and the average values of other parameters during Case 2 were input into the ISORROPIA II. The degree of sensitivity was represented as the relative standard deviation (%RSD) of the re-calculated pH values, higher RSD implied higher sensitivity of this factor to pH and thus is more important for local pH.

Table 1 Comparison of the particle pH values in this study (median, min–max) and other sites (mean  $\pm$  standard deviation).

|                 | Observation site           | Period                  | pH              | Model        | Reference            |
|-----------------|----------------------------|-------------------------|-----------------|--------------|----------------------|
| This study      | Zhengzhou, China (Urban)   | Jan 2018                | 4.5 (3.8–5.2)   |              |                      |
|                 | Anyang, China (Urban)      | Jan 2018                | 4.8 (3.9–5.8)   |              |                      |
|                 | Anyang, China (Rural)      | Jan 2018                | 4.9 (4.1–6.2)   | ISORROPIA-II |                      |
|                 | Xinxiang, China (Rural)    | Jan 2018                | 5.1 (4.7–6.3)   |              |                      |
|                 | Puyang, China (Rural)      | Jan 2018                | 5.2 (4.8–6.5)   |              |                      |
| China           | Beijing, China (Urban)     | Feb 2017                | 4.5 $\pm$ 0.7   | ISORROPIA-II | Ding et al., 2019    |
|                 | Beijing, China (Urban)     | Dec 2016                | 4.3 $\pm$ 0.4   | ISORROPIA-II | Liu et al., 2017     |
|                 | Beijing, China (Urban)     | Jan–Feb 2015            | 4.5             | ISORROPIA-II | Guo et al., 2017     |
|                 | Xi'an, China (Urban)       | Nov–Dec 2012            | 5.0             | ISORROPIA-II | Guo et al., 2017     |
|                 | Tianjin, China (Urban)     | Dec–Jun 2015            | 4.9 $\pm$ 1.4   | ISORROPIA-II | Shi et al., 2017     |
|                 | Tianjin, China (Urban)     | Aug 2015                | 3.4 $\pm$ 0.5   | ISORROPIA-II | Shi et al., 2019     |
|                 | Hohhot, China              | Winter 2015             | 5.7             | ISORROPIA-II | Wang et al., 2019    |
|                 | PRD, China (Rural)         | Fall-winter season 2012 | 0.81 $\pm$ 0.24 | AIM-II model | Fu et al., 2015      |
|                 | Hong Kong, China (Urban)   | 2001                    | 0.25            | AIM-II model | Pathak et al., 2004  |
|                 | Singapore (Urban)          | Sep–Nov 2011            | 0.60            | AIM-IV model | Sailesh et al., 2013 |
| Other countries | Northeastern US (Urban)    | Feb–Mar 2015            | 0.07 $\pm$ 0.96 | ISORROPIA-II | Guo et al., 2016     |
|                 | Alabama, USA (Rural)       | Jun–Jul 2013            | 1.94 $\pm$ 0.59 | ISORROPIA-II | Guo et al., 2015     |
|                 | Georgia, USA (Rural)       | Aug–Oct 2016            | 2.2 $\pm$ 0.6   | ISORROPIA-II | Nah et al., 2018     |
|                 | Crete, Greece (Background) | Aug–Nov 2012            | 1.25 $\pm$ 1.14 | ISORROPIA-II | Boucher et al., 2016 |

Table 2 Descriptions of the five sampling sites.

| City      | Classification | Site | Coordinate         | Location                                                             | Surrounding environment                                         | Emission (Gg)                |                               |                               |
|-----------|----------------|------|--------------------|----------------------------------------------------------------------|-----------------------------------------------------------------|------------------------------|-------------------------------|-------------------------------|
|           |                |      |                    |                                                                      |                                                                 | NH <sub>3</sub> <sup>*</sup> | SO <sub>2</sub> <sup>**</sup> | NO <sub>x</sub> <sup>**</sup> |
| Zhengzhou | Urban          | U-ZZ | 34.82° N 113.54° E | West to the Zhengzhou downtown (Zhengzhou University)                | Densely occupied residences, light industry, freeways and roads | 39.2                         | 36.7                          | 31.8                          |
| Anyang    | Urban          | U-AY | 36.09° N 114.41° E | East to the Anyang downtown (Anyang Environmental Protection Bureau) | Occupied residences, heavy industry and traffic roads           | 57.8                         | 46.9                          | 37.1                          |
|           | Rural          | R-AY | 36.22° N 114.39° E | 15 km north of Anyang city (Baizhuang town)                          | High ways, small villages, and cropland                         |                              |                               |                               |
| Xinxiang  | Rural          | R-XX | 35.38° N 114.30° E | 35 km northeast of Xinxiang city (Banzao town)                       | Small villages and cropland                                     | 72.1                         | 8.9                           | 19.6                          |
| Puyang    | Rural          | R-PY | 36.15° N 115.10° E | 44 km north of Puyang city (Liangcun town)                           | Small villages and cropland                                     | 39.6                         | 3.4                           | 3.2                           |

\* Data from a 2015-based NH<sub>3</sub> emission inventory (Wang et al., 2018a).

\*\* Data from Henan Statistical Yearbook of 2018 (BSH, 2018).

Table 3 Summary (mean  $\pm$  standard deviation) of gaseous precursors ( $\mu\text{g}/\text{m}^3$ ), water-soluble inorganic ions ( $\mu\text{g}/\text{m}^3$ ), T ( $^{\circ}\text{C}$ ), and RH (%) during three cases of haze periods at five sites.

|                               | Case 1 (January 12–14) |                 |                 |                 |                 | Case 2 (January 14–21) |                 |                 |                 |                 | Case 3 (January 21–25) |                 |                 |                |                |
|-------------------------------|------------------------|-----------------|-----------------|-----------------|-----------------|------------------------|-----------------|-----------------|-----------------|-----------------|------------------------|-----------------|-----------------|----------------|----------------|
|                               | U-ZZ                   | U-AY            | R-AY            | R-XX            | R-PY            | U-ZZ                   | U-AY            | R-AY            | R-XX            | R-PY            | U-ZZ                   | U-AY            | R-AY            | R-XX           | R-PY           |
| HNO <sub>3</sub>              | 0.9 $\pm$ 0.2          | 0.7 $\pm$ 0.2   | 3.1 $\pm$ 0.2   | 3.0 $\pm$ 0.1   | 3.9 $\pm$ 0.1   | 1.3 $\pm$ 0.3          | 1.1 $\pm$ 0.3   | 3.7 $\pm$ 0.4   | 3.7 $\pm$ 0.5   | 4.2 $\pm$ 0.2   | 0.9 $\pm$ 0.3          | 0.7 $\pm$ 0.2   | 4.9 $\pm$ 1.0   | 3.3 $\pm$ 0.2  | 3.3 $\pm$ 0.2  |
| NH <sub>3</sub>               | 17.0 $\pm$ 3.7         | 19.6 $\pm$ 8.0  | 22.9 $\pm$ 6.3  | 21.6 $\pm$ 4.1  | 17.8 $\pm$ 3.7  | 19.5 $\pm$ 5.2         | 23.6 $\pm$ 6.5  | 25.2 $\pm$ 6.5  | 24.7 $\pm$ 9.9  | 26.5 $\pm$ 6.7  | 10.5 $\pm$ 6.9         | 8.8 $\pm$ 4.7   | 10.6 $\pm$ 4.7  | 8.4 $\pm$ 3.5  | 12.1 $\pm$ 3.5 |
| HCl                           | 0.1 $\pm$ 0.0          | 0.7 $\pm$ 0.6   | 0.5 $\pm$ 0.1   | 0.6 $\pm$ 0.1   | 1.8 $\pm$ 0.1   | 0.1 $\pm$ 0.1          | 0.4 $\pm$ 0.1   | 0.6 $\pm$ 0.2   | 0.6 $\pm$ 0.1   | 2.0 $\pm$ 0.1   | 0.1 $\pm$ 0.1          | 0.5 $\pm$ 0.1   | 1.7 $\pm$ 0.1   | 1.0 $\pm$ 0.4  | 1.5 $\pm$ 0.4  |
| NO <sub>3</sub> <sup>-</sup>  | 41.5 $\pm$ 14.6        | 28.0 $\pm$ 14.6 | 43.0 $\pm$ 12.5 | 32.8 $\pm$ 12.9 | 25.2 $\pm$ 9.1  | 74.2 $\pm$ 32.9        | 58.0 $\pm$ 18.3 | 76.8 $\pm$ 21.1 | 64.1 $\pm$ 18.7 | 64.4 $\pm$ 21.7 | 32.4 $\pm$ 13.5        | 18.9 $\pm$ 5.4  | 26.0 $\pm$ 5.8  | 25.1 $\pm$ 6.7 | 18.8 $\pm$ 4.3 |
| NH <sub>4</sub> <sup>+</sup>  | 18.6 $\pm$ 6.2         | 15.9 $\pm$ 8.3  | 21.8 $\pm$ 8.0  | 14.9 $\pm$ 6.2  | 12.8 $\pm$ 4.5  | 31.9 $\pm$ 12.5        | 35.2 $\pm$ 12.0 | 47.6 $\pm$ 13.1 | 35.6 $\pm$ 10.4 | 39.9 $\pm$ 14.9 | 17.4 $\pm$ 6.0         | 11.6 $\pm$ 4.4  | 14.3 $\pm$ 4.4  | 12.9 $\pm$ 4.0 | 10.1 $\pm$ 2.9 |
| SO <sub>4</sub> <sup>2-</sup> | 17.8 $\pm$ 7.2         | 14.4 $\pm$ 9.0  | 13.7 $\pm$ 10.0 | 10.0 $\pm$ 5.5  | 8.6 $\pm$ 2.3   | 38.3 $\pm$ 18.0        | 34.5 $\pm$ 13.0 | 46.8 $\pm$ 16.9 | 32.9 $\pm$ 12.5 | 39.2 $\pm$ 13.6 | 19.8 $\pm$ 8.6         | 15.1 $\pm$ 6.1  | 15.1 $\pm$ 7.3  | 14.4 $\pm$ 4.8 | 13.3 $\pm$ 4.0 |
| Ca <sup>2+</sup>              | 0.7 $\pm$ 0.5          | 0.5 $\pm$ 0.3   | 5.0 $\pm$ 2.2   | 0.8 $\pm$ 0.2   | 3.4 $\pm$ 0.3   | 0.5 $\pm$ 0.4          | 0.4 $\pm$ 0.4   | 2.2 $\pm$ 1.2   | 1.0 $\pm$ 0.3   | 3.3 $\pm$ 0.6   | 0.1 $\pm$ 0.1          | 0.2 $\pm$ 0.2   | 1.8 $\pm$ 0.7   | 0.5 $\pm$ 0.1  | 2.4 $\pm$ 0.5  |
| Na <sup>+</sup>               | 1.5 $\pm$ 0.2          | 1.0 $\pm$ 0.0   | 1.4 $\pm$ 0.4   | 0.7 $\pm$ 0.1   | 2.2 $\pm$ 0.1   | 1.6 $\pm$ 0.2          | 1.0 $\pm$ 0.1   | 1.4 $\pm$ 0.4   | 0.8 $\pm$ 0.1   | 2.2 $\pm$ 0.0   | 1.1 $\pm$ 0.2          | 1.0 $\pm$ 0.2   | 2.2 $\pm$ 0.4   | 1.3 $\pm$ 0.4  | 2.2 $\pm$ 0.2  |
| Cl <sup>-</sup>               | 7.5 $\pm$ 2.5          | 2.7 $\pm$ 3.4   | 6.6 $\pm$ 2.5   | 5.4 $\pm$ 1.5   | 6.3 $\pm$ 1.2   | 8.5 $\pm$ 3.2          | 12.0 $\pm$ 4.2  | 18.5 $\pm$ 5.0  | 9.7 $\pm$ 2.6   | 14.4 $\pm$ 3.8  | 3.3 $\pm$ 1.5          | 4.5 $\pm$ 1.6   | 6.9 $\pm$ 1.6   | 4.7 $\pm$ 0.9  | 5.4 $\pm$ 1.4  |
| Mg <sup>2+</sup>              | 0.2 $\pm$ 0.0          | 0.1 $\pm$ 0.0   | 0.4 $\pm$ 0.1   | 0.1 $\pm$ 0.0   | 0.5 $\pm$ 0.0   | 0.2 $\pm$ 0.0          | 0.1 $\pm$ 0.0   | 0.4 $\pm$ 0.4   | 0.1 $\pm$ 0.0   | 0.5 $\pm$ 0.1   | 0.2 $\pm$ 0.0          | 0.1 $\pm$ 0.0   | 0.4 $\pm$ 0.1   | 0.1 $\pm$ 0.1  | 0.4 $\pm$ 0.1  |
| K <sup>+</sup>                | 2.9 $\pm$ 0.7          | 1.4 $\pm$ 0.5   | 1.6 $\pm$ 0.6   | 1.6 $\pm$ 0.4   | 2.5 $\pm$ 0.6   | 4.4 $\pm$ 1.7          | 2.4 $\pm$ 0.7   | 2.9 $\pm$ 0.7   | 1.9 $\pm$ 0.6   | 3.7 $\pm$ 1.1   | 1.9 $\pm$ 0.7          | 0.9 $\pm$ 0.3   | 0.8 $\pm$ 0.3   | 0.8 $\pm$ 0.2  | 1.2 $\pm$ 0.4  |
| T                             | 0.3 $\pm$ 3.1          | -0.9 $\pm$ 3.7  | -1.8 $\pm$ 4.4  | -2.0 $\pm$ 3.9  | -1.7 $\pm$ 4.8  | 4.2 $\pm$ 2.2          | 2.6 $\pm$ 2.5   | 0.1 $\pm$ 2.8   | 1.2 $\pm$ 2.9   | 0.4 $\pm$ 3.0   | -0.8 $\pm$ 1.8         | -2.7 $\pm$ 1.8  | -3.2 $\pm$ 1.9  | -2.8 $\pm$ 2.6 | -4 $\pm$ 2.3   |
| RH                            | 63.7 $\pm$ 12.1        | 60.3 $\pm$ 15.4 | 54.0 $\pm$ 16.0 | 58.5 $\pm$ 13.5 | 49.7 $\pm$ 14.5 | 66.0 $\pm$ 11.4        | 60.1 $\pm$ 9.9  | 58.6 $\pm$ 9.9  | 62.7 $\pm$ 11.6 | 65.8 $\pm$ 11.7 | 67 $\pm$ 13.1          | 63.7 $\pm$ 13.8 | 55.9 $\pm$ 13.6 | 59 $\pm$ 13.7  | 56.8 $\pm$ 16  |

Table 4 Sensitivity of pH to input data. The real-time measured values of a variable and the average values of other parameters during Case 2 were input into the ISORROPIA II. The degree of sensitivity was represented as the relative standard deviation (%RSD) of the re-calculated pH values, higher RSD implied higher sensitivity of this factor to pH and thus is more important for local pH.

|      | TH <sub>2</sub> SO <sub>4</sub> | TNH <sub>x</sub> | TNO <sub>3</sub> | TNa   | TCl   | Ca <sup>2+</sup> | K <sup>+</sup> | Mg <sup>2+</sup> | RH    | T     |
|------|---------------------------------|------------------|------------------|-------|-------|------------------|----------------|------------------|-------|-------|
| U-ZZ | 12.1 %                          | 12.8 %           | 6.1 %            | 0.1 % | 0.3 % | 3.3 %            | 0.3 %          | 0.2 %            | 1.3 % | 2.7 % |
| U-AY | 5.8 %                           | 7.4 %            | 1.0 %            | 0.1 % | 1.1 % | 0.4 %            | 0.3 %          | 0.0 %            | 1.6 % | 2.8 % |
| R-AY | 6.5 %                           | 10.9 %           | 1.4 %            | 0.1 % | 0.7 % | 1.2 %            | 0.2 %          | 0.3 %            | 1.9 % | 2.7 % |
| R-XX | 5.4 %                           | 11.1 %           | 1.1 %            | 0.1 % | 0.7 % | 0.4 %            | 0.2 %          | 0.1 %            | 2.0 % | 2.9 % |
| R-PY | 4.7 %                           | 9.4 %            | 1.5 %            | 0.0 % | 0.7 % | 0.5 %            | 0.4 %          | 0.1 %            | 2.3 % | 3.1 % |



## 1 Supplement materials:

2

### 3 Text S1 Calculation of ions balance and equivalent ratio.

### 4 Text S2 Backward trajectory frequency analysis

### 5 Text S3 NH<sub>x</sub> calculation

6

### 7 Text S1 Calculation of ions balance and equivalent ratio.

8 The ions balance and equivalent ratio are calculated using the following formulas:

$$9 \quad [\text{cations}] = \frac{[\text{NH}_4^+]}{18} + \frac{[\text{Na}^+]}{23} + \frac{[\text{K}^+]}{39} + \frac{[\text{Ca}^{2+}]}{20} + \frac{[\text{Mg}^{2+}]}{12} \quad (1)$$

$$10 \quad [\text{anions}] = \frac{[\text{SO}_4^{2-}]}{48} + \frac{[\text{NO}_3^-]}{62} + \frac{[\text{Cl}^-]}{35.5} \quad (2)$$

$$11 \quad \text{ion balance} = [\text{cations}] - [\text{anions}] \quad (3)$$

$$12 \quad \text{equivalent ratio} = [\text{cations}]/[\text{anions}] \quad (4)$$

13 where [Na<sup>+</sup>], [K<sup>+</sup>], [Ca<sup>2+</sup>], [Mg<sup>2+</sup>], [NH<sub>4</sub><sup>+</sup>], [SO<sub>4</sub><sup>2-</sup>], [NO<sub>3</sub><sup>-</sup>], and [Cl<sup>-</sup>] are the measured concentrations

14 (μg/m<sup>3</sup>) in the atmosphere. In addition to the measurement uncertainties, equivalent ratios lower than

15 1 might be attributed to the loss of cations from the volatilization of ammonium and unmeasured

16 hydrogen ions (Meng et al., 2016). Equivalent ratios higher than 1 were most likely caused by water-

17 soluble organic anions, CO<sub>3</sub><sup>2-</sup> and HCO<sub>3</sub><sup>-</sup> contents that were not detected in chemical analysis (Tian et

18 al., 2018).

19

### 20 Text S2 Backward trajectory frequency analysis

21 The Hybrid Single-Particle Lagrangian Integrated Trajectory (HYSPLIT) Web version of the

22 National Oceanic and Atmospheric Administration Air Resources Laboratory (Stein et al., 2015) was  
23 used to calculate backward trajectories from gridded meteorological data (at 500 m above ground level)  
24 at regular time intervals (12 h). For modeling the trajectory frequency, the system will start a trajectory  
25 from a single location and height every 6 hours and then sum the frequency that the trajectory passed  
26 over a grid cell and then normalize by either the total number of trajectories or endpoints. The grid  
27 resolution was selected as 1° according to the scale of the desired result. The frequency distribution  
28 maps (Fig. S7) of the five sampling sites recorded during the three cases support our findings: the  
29 southern regions of Henan Province (e.g., Xuchang and Zhumadian cities) were a high probability (>  
30 20 %) source for the five sites during Case 1 (Fig. S7a); the trajectory frequency during Case 2 (Fig.  
31 S7b) uniformly distributed around the receptor sites is most probably connected to local emissions;  
32 and the five sites during Case 3 (Fig. S7c) were affected by the air masses from northeastern areas  
33 (e.g., Dezhou and Liaocheng cities) with the frequencies higher than 20 %.

34

### 35 **Text S3 NH<sub>x</sub> calculation**

36 With respect to measurements of semi-volatile gases, the concentrations of NH<sub>3</sub> were extremely  
37 higher than HNO<sub>3</sub> and HCl, consistent with the Song et al. (2018) and Liu et al. (2017). TNH<sub>x</sub>, required  
38 NH<sub>x</sub> (Required-NH<sub>x</sub>), and excess NH<sub>x</sub> (Excess-NH<sub>x</sub>) concentrations were calculated using the  
39 following formulas:

$$40 \quad \text{Total NH}_x = 17 \times \left( \frac{[\text{NH}_4^+]}{18} + \frac{[\text{NH}_3]}{17} \right), \quad (5)$$

$$\text{Required NH}_x = 17 \times \left( \frac{[\text{SO}_4^{2-}]}{48} + \frac{[\text{NO}_3^-]}{63} + \frac{[\text{Cl}^-]}{35.5} + \frac{[\text{HNO}_3]}{64} + \frac{[\text{HCl}]}{36.5} \right) - 17 \times \left( \frac{[\text{Na}^+]}{23} + \frac{[\text{K}^+]}{39} + \frac{[\text{Ca}^{2+}]}{20} + \frac{[\text{Mg}^{2+}]}{12} \right), \quad (6)$$

$$\text{Excess NH}_x = \text{total NH}_x - \text{required NH}_x, \quad (7)$$

where  $[\text{Na}^+]$ ,  $[\text{K}^+]$ ,  $[\text{Ca}^{2+}]$ ,  $[\text{Mg}^{2+}]$ ,  $[\text{NH}_4^+]$ ,  $[\text{SO}_4^{2-}]$ ,  $[\text{NO}_3^-]$ ,  $[\text{Cl}^-]$ ,  $[\text{NH}_3]$ ,  $[\text{HNO}_3]$ , and  $[\text{HCl}]$  are the measured mass concentrations ( $\mu\text{g}/\text{m}^3$ ) of these species. Excess- $\text{NH}_x$  in this study represents a part of  $\text{TNH}_x$  (gas  $\text{NH}_3$  + particle  $\text{NH}_4^+$ ), while the other  $\text{NH}_x$  plus nonvolatile cations have been equivalent to all anions (Blanchard et al., 2000). If Excess- $\text{NH}_x$  is above 0, then the system is considered  $\text{NH}_x$ -

rich. Otherwise, the system is under the  $\text{NH}_x$ -poor condition.

#### Figure lists:

Fig. S1 Locations of the five monitoring stations in Henan Province, China (i.e., urban sites at Zhengzhou (U-ZZ) and Anyang (U-AY), rural sites at Anyang (R-AY), Xinxiang (R-XX), and Puyang (R-PY)). © 2019 National Geomatics Center of China. All rights reserved.

Fig. S2 Comparison between the predicted and measured  $\text{NH}_4^+$ ,  $\text{NO}_3^-$ ,  $\text{Cl}^-$ ,  $\text{NH}_3$ ,  $\text{HNO}_3$  and  $\text{HCl}$  at the five sites.

Fig. S3 Ion balance of water-soluble inorganic ions at the five sites.

Fig. S4 Comparison between the predicted and input  $\text{NH}_4^+$  (a, d) and  $\text{NH}_3$  (b, c) concentrations, the original and adjusted pH (c, f) of U-ZZ and R-PY sites after adjusting the measured  $\text{NH}_4^+$  concentrations to fit the ion balance.

Fig. S5 Comparison of predicted pH by ISORROPIA-II with E-AIM IV at the U-ZZ site.

Fig. S6 Temporal variations of temperature (T), relative humidity (RH), wind speed (WS), wind direction (WD), and concentrations of  $\text{NH}_3$ ,  $\text{NH}_4^+$ ,  $\text{SO}_4^{2-}$ , and  $\text{NO}_3^-$  during three cases at U-AY (a), R-

62 AY (b), R-XX (c), and R-PY (d) sites. The shaded areas represent the measurement uncertainties.

63 Fig. S7 Trajectory frequencies of typical periods at the five sites during Cases 1(a), 2(b), and 3(c).

64 The color scale bar represents the percentage of trajectories passing through each grid to total

65 trajectories.

66 Fig. S8 Time series of predicted  $PM_{2.5}$  pH at the five sites. The shaded areas show the range of

67 uncertainty in pH for the  $pH_{max}$  and  $pH_{min}$  calculations.

68 Fig. S9 Correlations between pH and  $H^+_{air}$  during sampling periods at the five sites. The color scale

69 bar represents the aerosol water content (AWC) concentration.

70 Fig. S10 Sensitivity tests of  $PM_{2.5}$  pH to input data. The real-time measured values of a variable and

71 the average values of other parameters during Case 2 were input into the ISORROPIA II model.

72 Fig. S11 Comparisons of the sensitivities of  $PM_{2.5}$  pH to TNa,  $K^+$ ,  $Ca^{2+}$ , and  $Mg^{2+}$  among the five sites.

73 The color scale bar represents the pH values. The relative standard deviation (RSD) and range (Range)

74 represent the sensitivity degree of pH to this variable and range (min–max) of the re-predicted pH

75 value in the test, respectively.

76

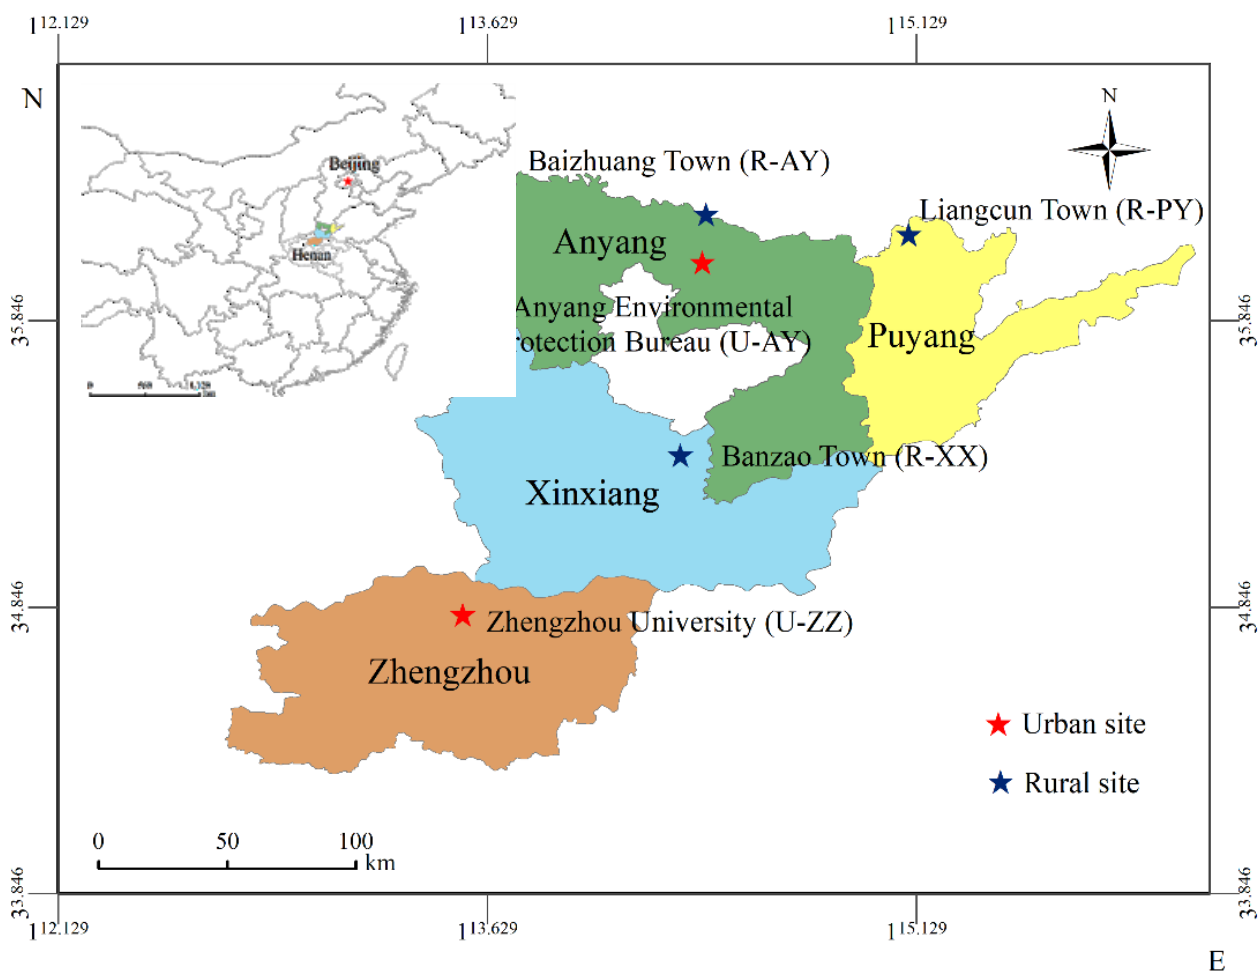

77

78 Fig. S1 Locations of the five monitoring stations in Henan Province, China (i.e., urban sites at  
 79 Zhengzhou (U-ZZ) and Anyang (U-AY), rural sites at Anyang (R-AY), Xinxiang (R-XX), and Puyang  
 80 (R-PY)). © 2019 National Geomatics Center of China. All rights reserved.

81

82

83

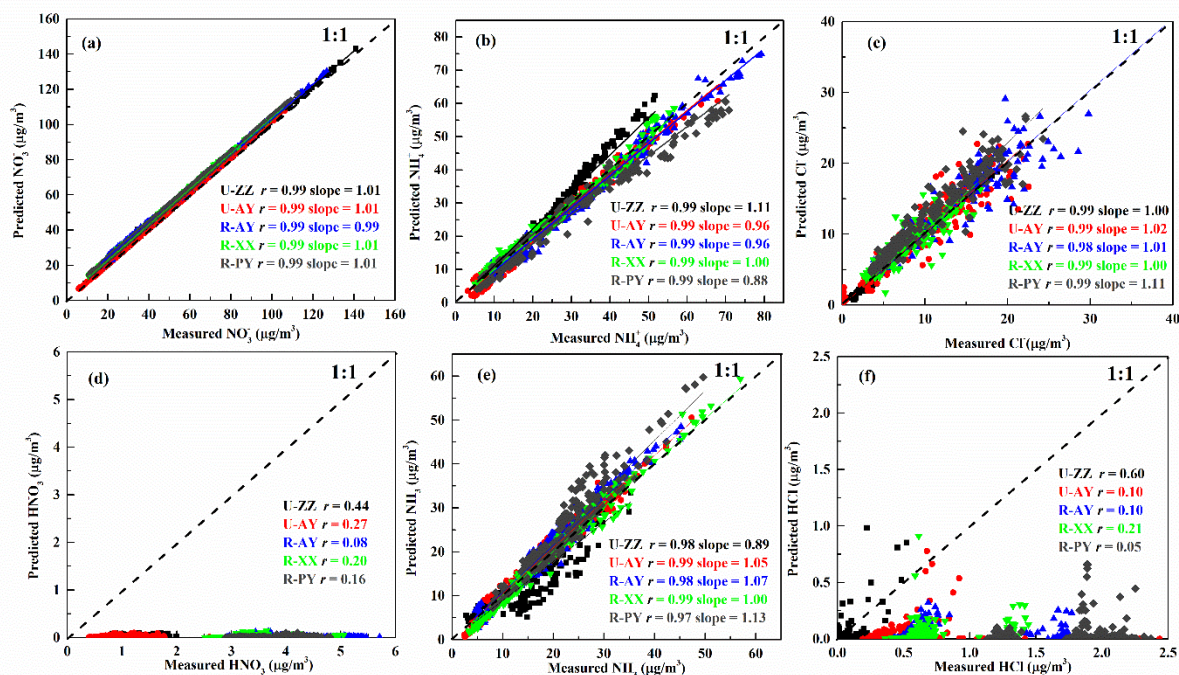

84

85 Fig. S2 Comparison between the predicted and measured  $\text{NH}_4^+$ ,  $\text{NO}_3^-$ ,  $\text{Cl}^-$ ,  $\text{NH}_3$ ,  $\text{HNO}_3$  and  $\text{HCl}$  at the

86 five sites.

87

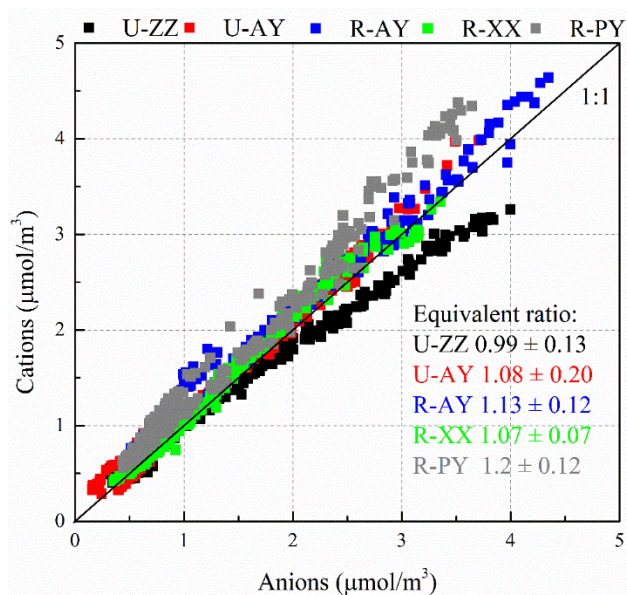

88

89 Fig. S3 Ion balance of water-soluble inorganic ions at the five sites.



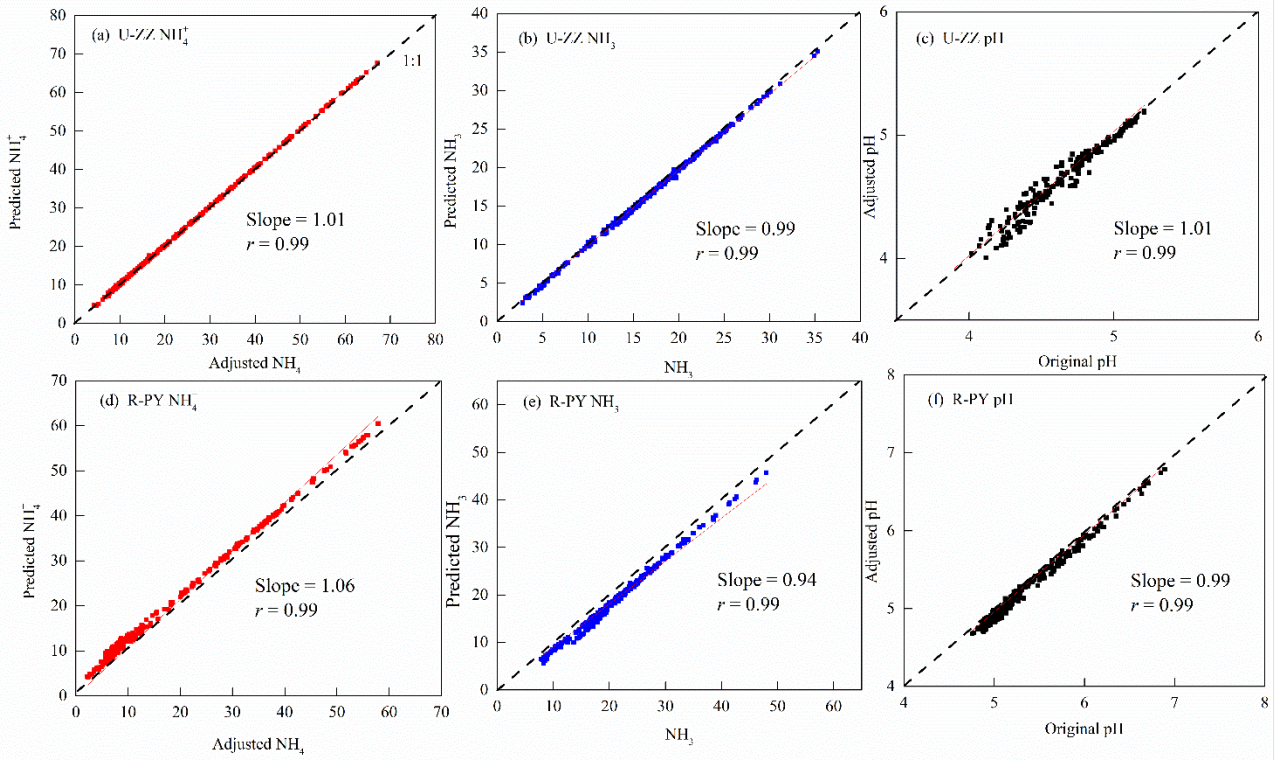

90

91 Fig. S4 Comparison between the predicted and input  $\text{NH}_4^+$  (a, d) and  $\text{NH}_3$  (b, c) concentrations, the

92 original and adjusted pH (c, f) of U-ZZ and R-PY sites after adjusting the measured  $\text{NH}_4^+$

93 concentrations to fit the ion balance.

94

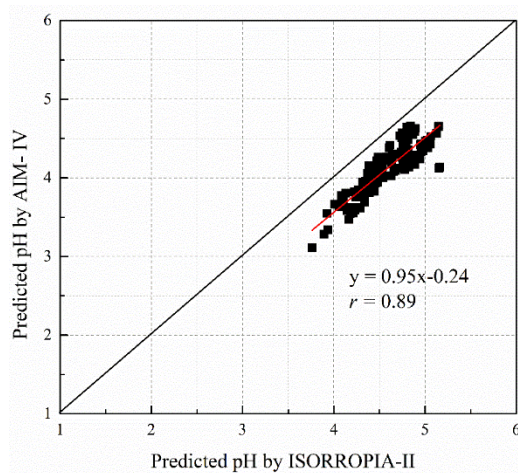

95

96 Fig. S5 Comparison of predicted pH by ISORROPIA-II with E-AIM IV at the U-ZZ site.

97

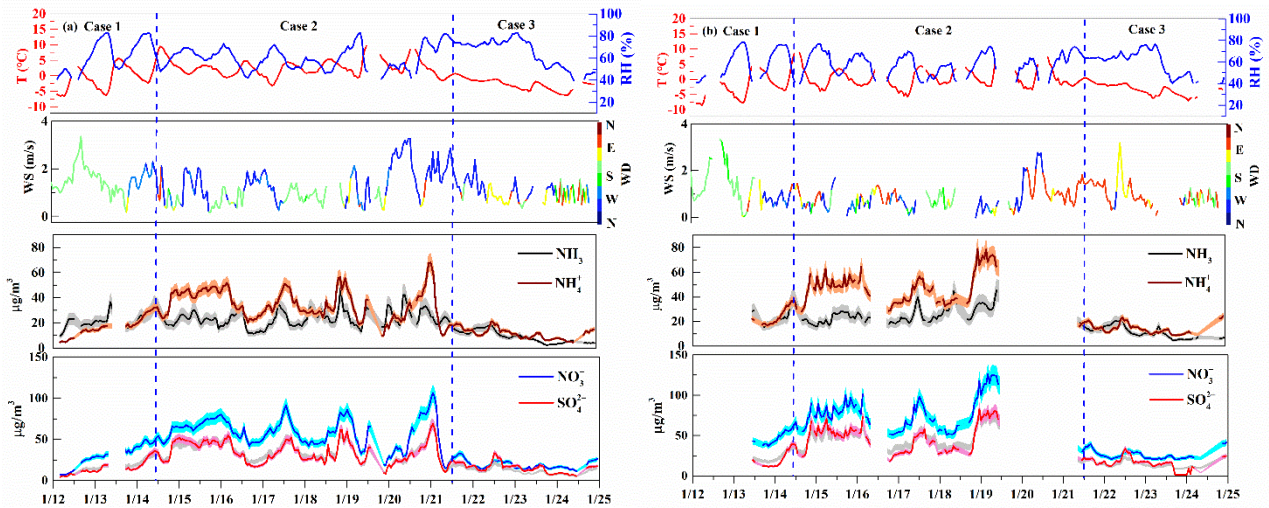

98

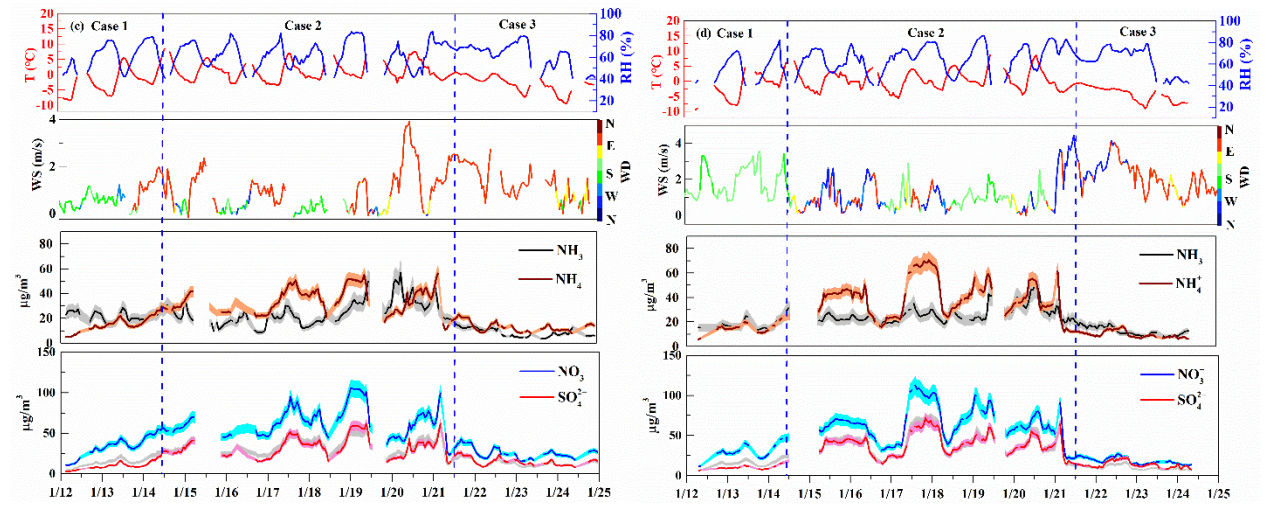

99

Fig. S6 Temporal variations of temperature (T), relative humidity (RH), wind speed (WS), wind

100

direction (WD), and concentrations of  $\text{NH}_3$ ,  $\text{NH}_4^+$ ,  $\text{SO}_4^{2-}$ , and  $\text{NO}_3^-$  during three cases at U-AY (a), R-

101

AY (b), R-XX (c), and R-PY (d) sites. The shaded areas represent the measurement uncertainties.



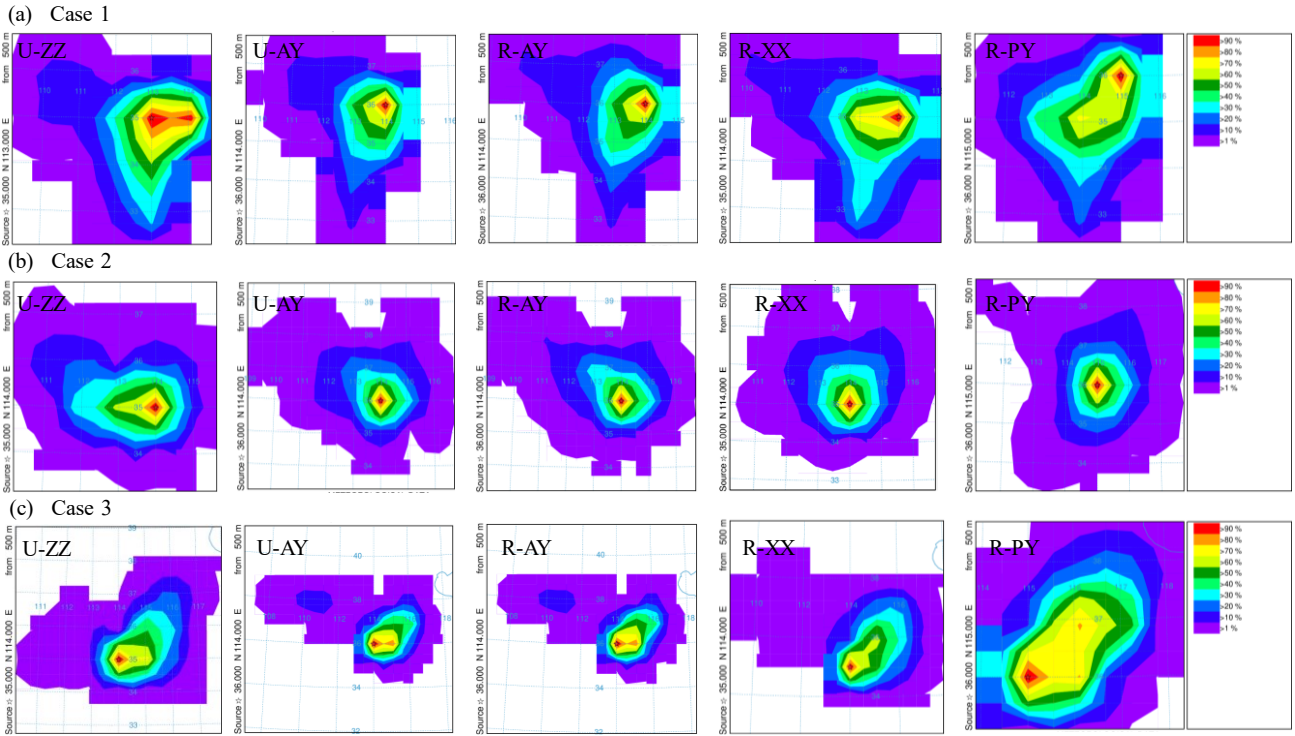

102

103 Fig. S7 Trajectory frequencies of typical periods at the five sites during Cases 1(a), 2(b), and 3(c).

104 The color scale bar represents the percentage of trajectories passing through each grid to total

105 trajectories.

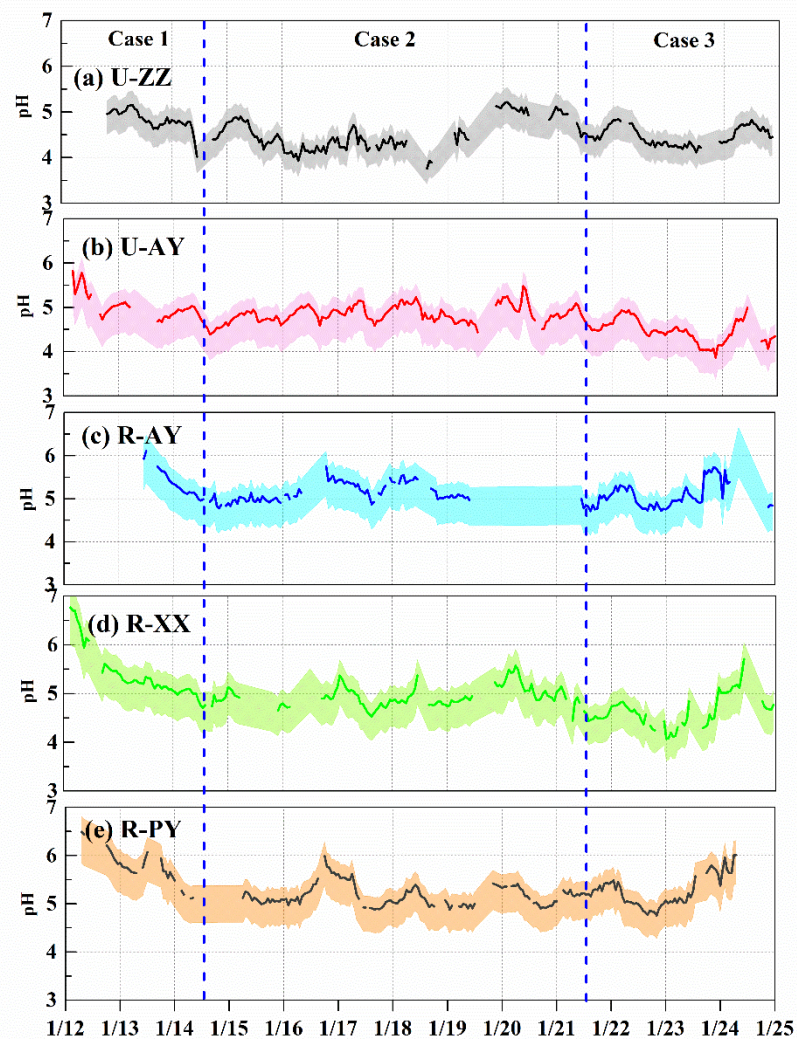

106

107 Fig. S8 Time series of predicted PM<sub>2.5</sub> pH at the five sites. The shaded areas show the range of

108 uncertainty in pH for the pH<sub>max</sub> and pH<sub>min</sub> calculations.

109

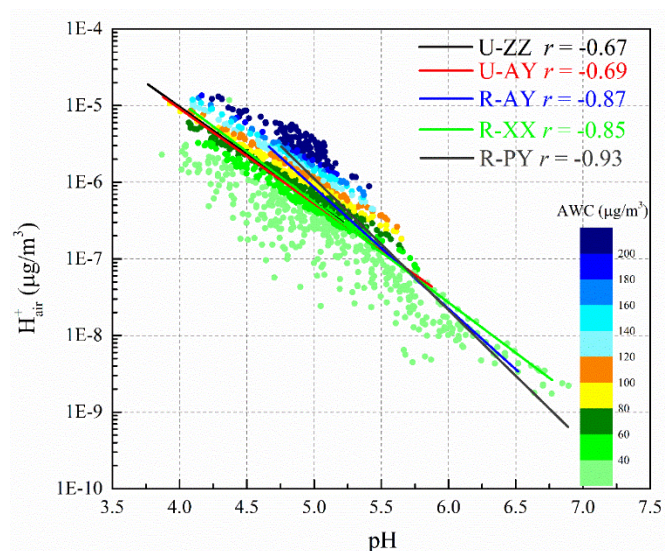

110

111 Fig. S9 Correlations between pH and  $H^+_{\text{air}}$  during sampling periods at the five sites. The color scale

112 bar represents the aerosol water content (AWC) concentration.

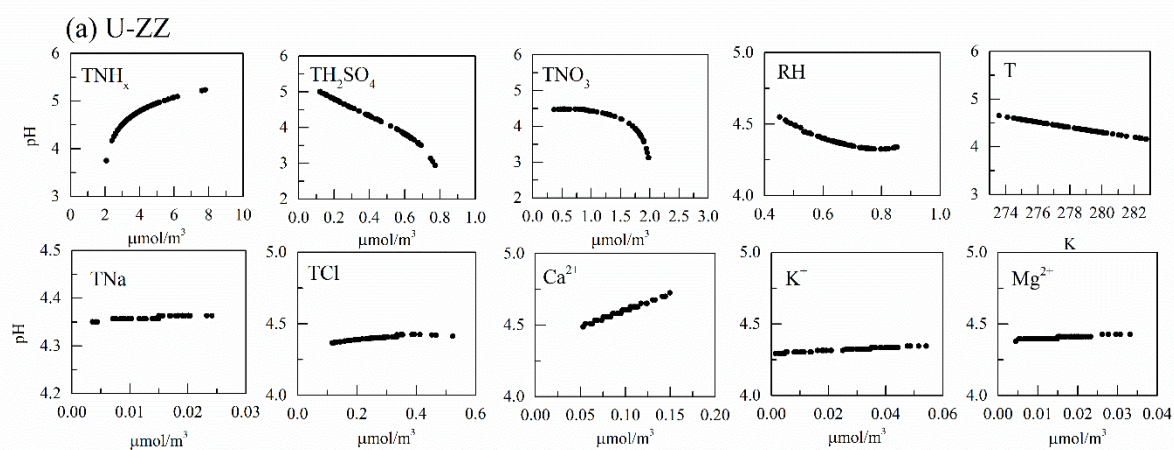

113

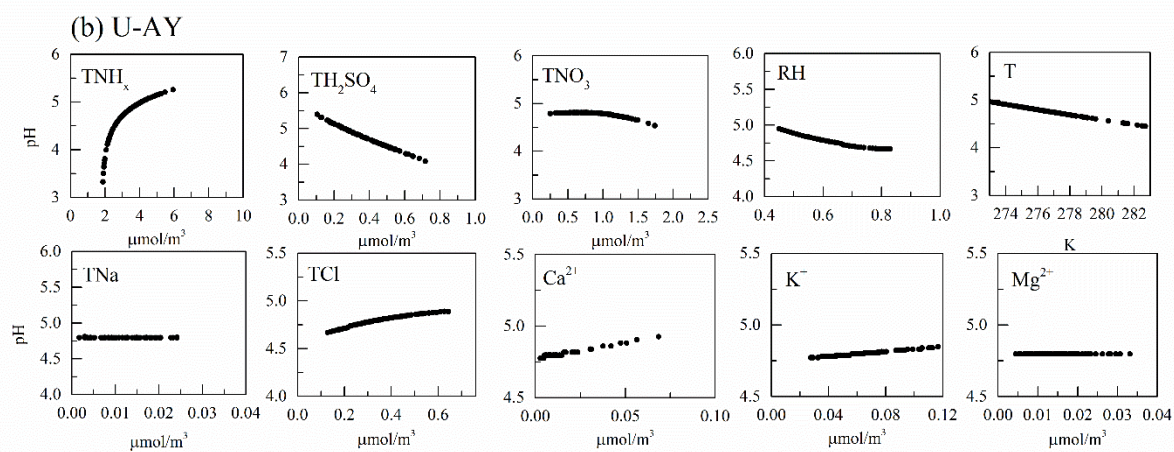

114



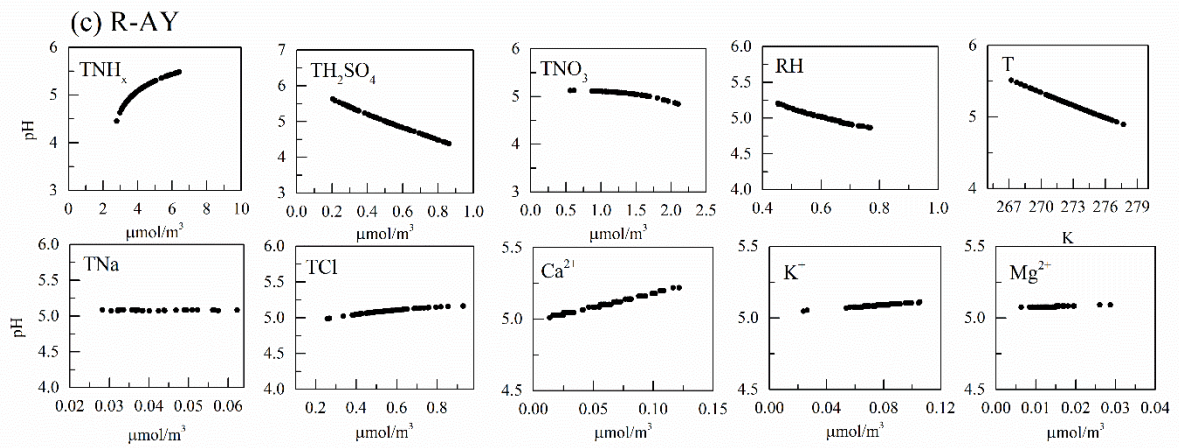

115

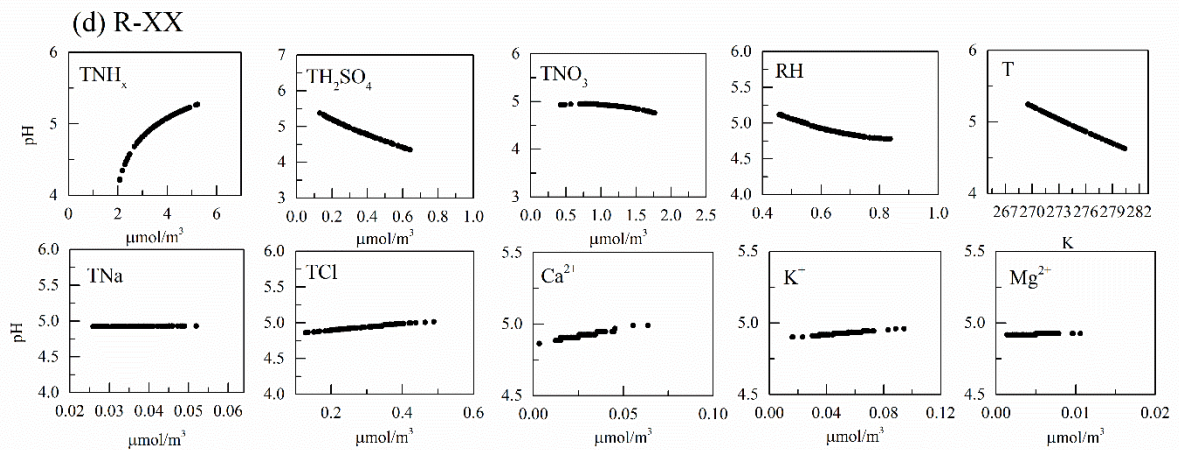

116

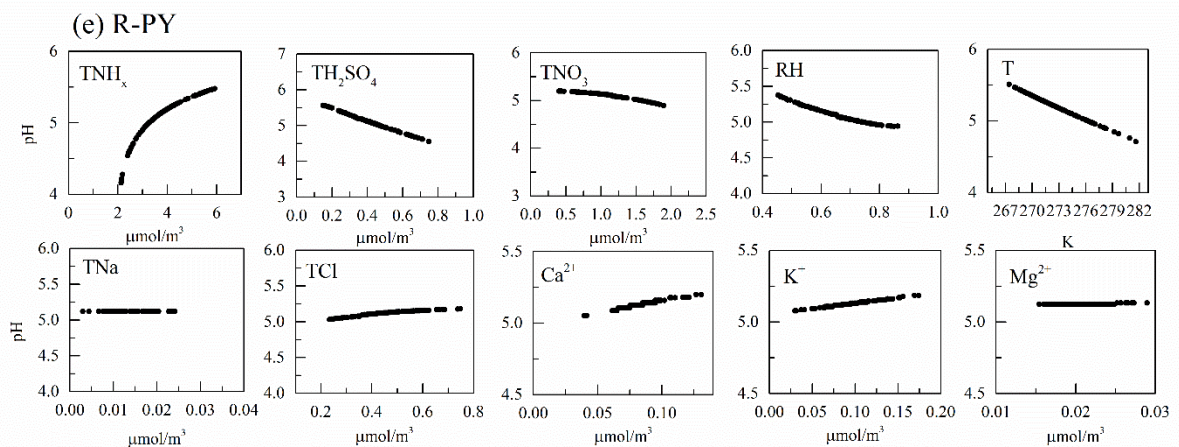

117

118 Fig. S10 Sensitivity tests of PM<sub>2.5</sub> pH to input data. The real-time measured values of a variable and  
 119 the average values of other parameters during Case 2 were input into the ISORROPIA II model.

120

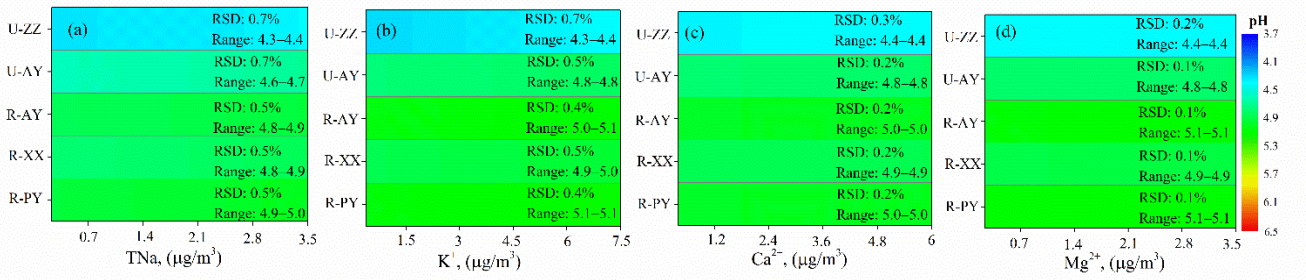

121

122 Fig. S11 Comparisons of the sensitivities of PM<sub>2.5</sub> pH to TNa (replaced by observed Na<sup>+</sup>), K<sup>+</sup>, Ca<sup>2+</sup>,  
 123 and Mg<sup>2+</sup> among the five sites. The color scale bar represents the pH values. The relative standard  
 124 deviation (RSD) and range (Range) represent the sensitivity degree of pH to this variable and range  
 125 (min–max) of the re-predicted pH value in the test, respectively.

126

127

128

129

130

131

132 **Table lists:**

133 Table S1 Summarized NH<sub>3</sub> concentrations (µg/m<sup>3</sup>) in this study and other sites.

134 Table S2 Statistical values of pH during three cases.

135 Table S3 Pearson’s correlation coefficients (*r*) between H<sup>+</sup><sub>air</sub> with observed data at the five sites.

136 Table S4 Variation ranges of each variable for assessing the different effects of this variable among  
 137 five sites and their observed minimum and maximum values.

138

139

140

141

142 Table S1 Summarized NH<sub>3</sub> concentrations (μg/m<sup>3</sup>) in this study and other sites.

| Cities                   | Period          | NH <sub>3</sub> | References             | 143 |
|--------------------------|-----------------|-----------------|------------------------|-----|
| Zhengzhou, China         | 2018.01         | 22.0 ± 8.9      | This study             |     |
| Anyang, China            | 2018.01         | 25.3 ± 10.5     | This study             |     |
| Anyang, China            | 2018.01         | 25.8 ± 12.0     | This study             |     |
| Xinxiang, China          | 2018.01         | 26.1 ± 14.0     | This study             |     |
| Puyang, China            | 2018.01         | 27.1 ± 17.3     | This study             |     |
| Zhengzhou, China         | 2017.03–2018.04 | 11.7            | Wang et al., 2018      |     |
| Beijing, China           | 2015.01–03      | 7.3             | Zhang et al., 2018     |     |
| Beijing, China           | 2008.02–2010.07 | 22.8 ± 16.3     | Wang et al., 2018      |     |
| Beijing, China           | 2007.01–2010.07 | 10.2 ± 10.8     | Wang et al., 2018      |     |
| Beijing, China           | 2001.07–2001.08 | 16.8–42.2       | Wang et al., 2018      |     |
| North China Plain, China | 2006.08–2009.09 | 11.7–31.9       | Shen et al., 2011      |     |
| Xi'an, China             | 2006.04–2007.04 | 18.6            | Wang et al., 2018      |     |
| Xi'an, China             | 2006.04–2007.04 | 20.3            | Wang et al., 2018      |     |
| Chengdu, China           | 2014.07–2015.04 | 10.5 ± 4.8      | Wang et al., 2016      |     |
| Wanzhou, China           | 2014.07–2015.04 | 8.3 ± 4.7       | Wang et al., 2016      |     |
| shanghai, China          | 2014.05–2015.06 | 7.8             | Chang et al., 2019     |     |
| Hangzhou, China          | 2012.04–05      | 12.8            | Jansen et al., 2014    |     |
| Dalian, China            | 2010.09–2012.04 | 1.5             | Luo et al., 2014       |     |
| Fenghua, China           | 2010.08–2012.05 | 3.7             | Luo et al., 2014       |     |
| Fujian, China            | 2015.06–2016.05 | 21.0 ± 7.9      | Wang et al., 2018      |     |
| Fujian, China            | 2015.06–2017.03 | 10.5–13.5       | Wu et al., 2018        |     |
| Hong Kong, China         | 2003.10–2006.05 | 10.2            | Tanner, 2009           |     |
| Carolina, USA            | 2000.01–12      | 0.4–3.4         | Walker et al., 2004    |     |
| Delhi, India             | 2013.01–2015.12 | 25.3 ± 4.6      | Saraswati et al., 2019 |     |

145

Table S2 Statistical values of pH during three cases.

|      | Case 1          |        |                 |         | Case 2          |        |                 |         | Case 3          |        |                 |         |
|------|-----------------|--------|-----------------|---------|-----------------|--------|-----------------|---------|-----------------|--------|-----------------|---------|
|      | 25th percentile | Median | 75th percentile | Average | 25th percentile | Median | 75th percentile | Average | 25th percentile | Median | 75th percentile | Average |
| U-ZZ | 4.7             | 4.8    | 5.0             | 4.8     | 4.3             | 4.5    | 4.8             | 4.5     | 4.3             | 4.5    | 4.7             | 4.5     |
| U-AY | 4.8             | 5.0    | 5.2             | 5.1     | 4.7             | 4.8    | 5.0             | 4.8     | 4.4             | 4.5    | 4.8             | 4.5     |
| R-AY | 5.1             | 5.4    | 5.8             | 5.5     | 5.0             | 5.1    | 5.4             | 5.2     | 4.9             | 5.0    | 5.3             | 5.1     |
| R-XX | 5.1             | 5.3    | 5.6             | 5.4     | 4.8             | 4.9    | 5.1             | 4.9     | 4.5             | 4.7    | 5.0             | 4.7     |
| R-PY | 5.7             | 6.0    | 6.3             | 6.0     | 5.0             | 5.1    | 5.4             | 5.2     | 5.0             | 5.2    | 5.4             | 5.3     |

146

Table S3 Pearson's correlation coefficients ( $r$ ) between  $H^+_{air}$  with observed data at the five sites.

|                                 | U-ZZ    | U-AY     | R-AY    | R-XX     | R-PY    |
|---------------------------------|---------|----------|---------|----------|---------|
| TWSIIs                          | 0.834** | 0.521**  | 0.676** | 0.530**  | 0.774** |
| TNH <sub>x</sub>                | 0.650** | 0.368**  | 0.544** | 0.301**  | 0.703** |
| TH <sub>2</sub> SO <sub>4</sub> | 0.867** | 0.625**  | 0.765** | 0.638**  | 0.811** |
| TNO <sub>3</sub>                | 0.828** | 0.458**  | 0.607** | 0.502**  | 0.767** |
| TCl                             | 0.430** | 0.406**  | 0.602** | 0.223**  | 0.419** |
| K <sup>+</sup>                  | 0.757** | 0.388**  | 0.551** | 0.138*   | 0.485** |
| Ca <sup>2+</sup>                | -0.161* | -0.234** | -0.137* | -0.248** | 0.06    |
| TNa                             | 0.306** | -0.095   | 0.098   | 0.103    | -0.138* |
| Mg <sup>2+</sup>                | -0.009  | -0.027   | -0.018  | -0.050   | 0.026   |
| AWC                             | 0.63**  | 0.739**  | 0.903** | 0.755**  | 0.938** |
| T                               | 0.012   | 0.045    | -0.138* | -0.023   | 0.146*  |
| RH                              | 0.337** | 0.610**  | 0.631** | 0.637**  | 0.658** |

\* Correlation is significant at the 0.05 level (two-tailed).

\*\* Correlation is significant at the 0.01 level (two-tailed).

Table S4 Variation ranges of each variable for assessing the different effects of this variable among five sites and their observed minimum and maximum values.

| Species                                              | Observation |       | Setting |     | Gradient                 |
|------------------------------------------------------|-------------|-------|---------|-----|--------------------------|
|                                                      | Min         | Max   | Min     | Max |                          |
| T (°C)                                               | -5.8        | 14.3  | -6      | 15  | 0.1                      |
| RH (%)                                               | 26.8        | 92.3  | 30      | 95  | 0.1                      |
| TNH <sub>x</sub> (µg/m <sup>3</sup> )                | 21.2        | 96.7  | 25      | 95  | 0.01 µmol/m <sup>3</sup> |
| TNO <sub>3</sub> (µg/m <sup>3</sup> )                | 5.8         | 132.6 | 1       | 125 | 0.01 µmol/m <sup>3</sup> |
| TH <sub>2</sub> SO <sub>4</sub> (µg/m <sup>3</sup> ) | 6.9         | 82.7  | 10      | 80  | 0.01 µmol/m <sup>3</sup> |
| TCl (µg/m <sup>3</sup> )                             | 0.54        | 39.5  | 0.35    | 35  | 0.01 µmol/m <sup>3</sup> |
| TNa (µg/m <sup>3</sup> )                             | 0.29        | 3.33  | 0.25    | 3.5 | 0.01 µmol/m <sup>3</sup> |
| K <sup>+</sup> (µg/m <sup>3</sup> )                  | 0.27        | 7.8   | 0.1     | 7.5 | 0.01 µmol/m <sup>3</sup> |
| Ca <sup>2+</sup> (µg/m <sup>3</sup> )                | 0.2         | 5.2   | 0.4     | 6   | 0.01 µmol/m <sup>3</sup> |
| Mg <sup>2+</sup> (µg/m <sup>3</sup> )                | 0.11        | 3.1   | 0.25    | 3.5 | 0.01 µmol/m <sup>3</sup> |



## References:

- Blanchard, C. L., P. M. Roth, S. J. Tanenbaum, S. D. Ziman, and J. H. Seinfeld: The use of ambient measurements to identify which precursor species limit aerosol nitrate formation, *J. Air Waste Manage. Assoc.*, 50, 2073–2084, 2000.
- Chang, Y., Zou, Z., Zhang, Y., Deng, C., Hu, J., Shi, Z., Dore, A. J., Collett, J. L.: Assessing contributions of agricultural and nonagricultural emissions to atmospheric ammonia in a Chinese megacity. *Environ. Sci. Technol.*, 53, 1822–1833, 2019.
- Jansen, R. C., Shi, Y., Chen, J., Hu, Y., Xu, C., Hong, S., Li, J., Zhang, M.: Using hourly measurements to explore the role of secondary inorganic aerosol in PM<sub>2.5</sub> during haze and fog in Hangzhou, China. *Adv. Atmos. Sci.*, 31, 1427–1434, 2014.
- Liu, M., Song, Y., Zhou, T., Xu, Z., Yan, C., Zheng, M., Wu, Z., Hu, M., Wu, Y., Zhu, T.: Fine particle pH during severe haze episodes in northern China. *Geophys. Res. Lett.*, 44, 5213–5221, 2017.
- Luo, X. S., Tang, A. H., Shi, K., Wu, L. H., Li, W. Q., Shi, W. Q., Shi, X. K., Erisman, J. W., Zhang, F., Liu, X. J.: Chinese coastal seas are facing heavy atmospheric nitrogen deposition. *Environ. Res. Lett.*, 9, 095007, 2014.
- Meng, C. C., Wang, L. T., Zhang, F. F., Wei, Z., Ma, S. M., Ma, J., Yang, J.: Characteristics of concentrations and water-soluble inorganic ions in PM<sub>2.5</sub> in Handan City, Hebei province, China. *Atmos. Res.*, 171, 133–146, 2016.
- Saraswati, Sharma, S. K., Saxena, M., Mandal, T. K.: Characteristics of gaseous and particulate ammonia and their role in the formation of secondary inorganic particulate matter at Delhi, India. *Atmos. Res.*, 218, 34–49, 2019.
- Shen, J., Liu, X., Ying, Z., Fangmeier, A., Goulding, K., Zhang, F.: Atmospheric ammonia and particulate ammonium from agricultural sources in the North China Plain. *Atmos. Environ.*, 45, 5033–5041, 2011.

- Song, S., Gao, M., Xu, W., Shao, J., Shi, G., Wang, S., Wang, Y., Sun, Y., Mcelroy, M. B.: Fine particle pH for Beijing winter haze as inferred from different thermodynamic equilibrium models. *Atmos. Chem. Phys.*, 18, 7423–7438, 2018.
- Stein, A.F., Draxler, R.R., Rolph, G.D., Stunder, B.J.B., Cohen, M.D. and Ngan, F.: NOAA's HYSPLIT atmospheric transport and dispersion modeling system. *Bull. Am. Meteorol. Soc.* 96: 2059–2077, 2015.
- Tanner, P.A.: Vehicle-related ammonia emissions in Hong Kong. *Environ. Chem. Lett.*, 7, 37–40, 2009.
- Tian, S., Pan, Y., and Wang, Y.: Ion balance and acidity of size-segregated particles during haze episodes in urban Beijing. *Atmospheric Research* 201, 159–167, 2018.
- Walker, J. T., Whitall, D. R., Robarge, W. P., Paerl, H. W.: Ambient ammonia and ammonium aerosol across a region of variable ammonia emission density. *Atmos. Environ.*, 38, 1235–1246, 2004.
- Wang, C., Yin, S., Bai, L., Zhang, X., Gu, X., Zhang, H., Lu, Q., Zhang, R.: High-resolution ammonia emission inventories with comprehensive analysis and evaluation in Henan, China, 2006–2016. *Atmos. Environ.*, 193, 11–23, 2018.
- Wang, H., Yang, F., Shi, G., Tian, M., Zhang, L., Zhang, L., Fu, C.: Ambient concentration and dry deposition of major inorganic nitrogen species at two urban sites in Sichuan Basin, China. *Environ. Pollut.*, 219, 235–244, 2016.
- Wu, S., Dai, L., Wei, Y., Zhu, H., Zhang, Y., Schwab, J. J., Yuan, C.: Atmospheric ammonia measurements along the coastal lines of Southeastern China: Implications for inorganic nitrogen deposition to coastal waters. *Atmos. Environ.*, 177, 1–11, 2018.
- Zhang, R., Sun, X., Huang, Y., Shi, A., Yan, J., Nie, T., Yan, X., Li, X.: Secondary inorganic aerosols formation during haze episodes at an urban site in Beijing, China. *Atmos. Environ.*, 177, 275–282, 2018.
